# Supplementary material for: Elite Chaotic Manta Ray Algorithm Integrated with Chaotic Initialization and Opposition-Based Learning
Source: MDPI journal article supplement (doi:10.3390/math10162960), 2022-08-16
Supplement: s1 [file s1]

## Aquila Optimizer: A novel meta-heuristic optimization Algorithm

Laith Abualigah, Dalia Yousri, Mohamed Abd Elaziz, Ahmed A. Ewees,  
Mohammed A. A. Al-qaness, Amir H. Gandomi

PII: S0360-8352(21)00154-6  
DOI: <https://doi.org/10.1016/j.cie.2021.107250>  
Reference: CAIE 107250

To appear in: *Computers & Industrial Engineering*

Received Date: 16 October 2020  
Accepted Date: 16 March 2021

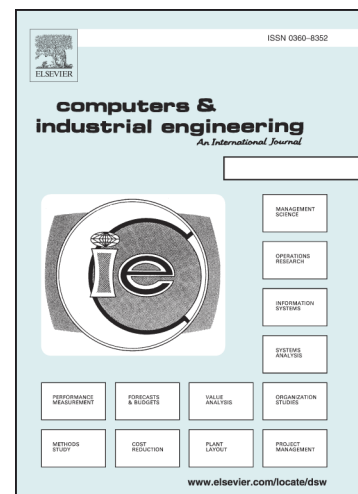

Please cite this article as: Abualigah, L., Yousri, D., Elaziz, M.A., Ewees, A.A., A. Al-qaness, M.A., Gandomi, A.H., Aquila Optimizer: A novel meta-heuristic optimization Algorithm, *Computers & Industrial Engineering* (2021), doi: <https://doi.org/10.1016/j.cie.2021.107250>

This is a PDF file of an article that has undergone enhancements after acceptance, such as the addition of a cover page and metadata, and formatting for readability, but it is not yet the definitive version of record. This version will undergo additional copyediting, typesetting and review before it is published in its final form, but we are providing this version to give early visibility of the article. Please note that, during the production process, errors may be discovered which could affect the content, and all legal disclaimers that apply to the journal pertain.

# Aquila Optimizer: A novel meta-heuristic optimization Algorithm

Laith Abualigah<sup>a</sup>, Dalia Yousri<sup>b</sup>, Mohamed Abd Elaziz<sup>c</sup>, Ahmed A. Ewees<sup>d</sup>, Mohammed A. A. Al-qaness<sup>e</sup>,  
Amir H. Gandomi<sup>f</sup>

<sup>a</sup>Faculty of Computer Sciences and Informatics, Amman Arab University, Amman 11953, Jordan

<sup>b</sup>Department of Electrical Engineering, Faculty of Engineering, Fayoum University, Fayoum, Egypt.

<sup>c</sup>Department of Mathematics, Faculty of Science, Zagazig University, Egypt.

<sup>d</sup>Department of Computer, Damietta University, Damietta 34517, Egypt.

<sup>e</sup>State Key Laboratory for Information Engineering in Surveying, Mapping and Remote Sensing, Wuhan University, Wuhan 430079, China

<sup>f</sup>Faculty of Engineering and Information Technology, University of Technology Sydney, Ultimo, NSW 2007, Australia

---

\*Corresponding author

Email addresses: Aligah.2020@gmail.com (Laith Abualigah), day01@fayoum.edu.eg (Dalia Yousri),  
abd\_el\_aziz\_m@yahoo.com (Mohamed Abd Elaziz), ewees@du.edu.eg (Ahmed A. Ewees), alqaness@whu.edu.cn (Mohammed  
A. A. Al-qaness), Amirhossein.Gandomi@uts.edu.au (Amir H. Gandomi)

**Highlights:**

- Developed a novel optimizer inspired by the behavior of Aquila (AO).
- Tested AO against classical, CEC2017, CEC2019 test functions and engineering problems.
- Compared the AO to other similar optimization algorithms.
- Demonstrated effectiveness and superiority of the proposed algorithm.

## CRedit author statement

**Laith Abualigah:** Supervision, Conceptualization, Methodology, Software, Investigation, Validation, Writing- Original draft preparation. **Dalia Yousri:** Writing- Original draft preparation, Visualization, Investigation. **Mohamed Abd Elaziz:** Writing- Original draft preparation, Visualization, Investigation. **Ahmed A. Ewees:** Writing- Original draft preparation, Visualization, Investigation. **Mohammed A. A. Al-qaness:** Writing- Original draft preparation, Visualization, Investigation. **Amir H. Gandomi:** Writing- Reviewing and Editing

# Aquila Optimizer: A novel meta-heuristic optimization Algorithm

---

## Abstract

This paper proposes a novel population-based optimization method, called Aquila Optimizer (AO), which is inspired by the Aquila's behaviors in nature during the process of catching the prey. Hence, the optimization procedures of the proposed AO algorithm are represented in four methods; selecting the search space by high soar with the vertical stoop, exploring within a diverge search space by contour flight with short glide attack, exploiting within a converge search space by low flight with slow descent attack, and swooping by walk and grab prey. To validate the new optimizer's ability to find the optimal solution for different optimization problems, a set of experimental series is conducted. For example, during the first experiment, AO is applied to find the solution of well-known 23 functions. The second and third experimental series aims to evaluate the AO's performance to find solutions for more complex problems such as thirty CEC2017 test functions and ten CEC2019 test functions, respectively. Finally, a set of seven real-world engineering problems are used. From the experimental results of AO that compared with well-known meta-heuristic methods, the superiority of the developed AO algorithm is observed.

*Keywords:* Aquila Optimizer (AO); Optimization Algorithms; Meta-heuristics; Real-word Problems; Optimization Problems.

---

## 1. Introduction

An optimization process refers to find the optimal values for specific parameters of a system to fulfill the system design at the lowest cost [1]. Generally, real-world applications and problems in artificial intelligence and machine learning have a discrete, unconstrained, or discrete nature [2]. Accordingly, employing traditional mathematical based programming methods is hard to find the optimal solutions [3]. Therefore, in all science fields, we can find optimization problems. In recent decades we witnessed various optimization algorithms have been proposed to improve different systems performance and reduce computation cost. The traditional optimization methods suffer from certain shortcomings and limitations, for example, converging to local optima and unknown search space. Besides, they have only a single-based solution [4]. To solve these shortcomings, in recent years, many new optimization methods have been proposed. They have been applied to solve various problems.

Meta-heuristic (MH) algorithms have received wide attention and have been employed to solve various optimization problems. In general, we can categorize MH into four categories, swarm intelligence (SI) algorithms, Evolutionary Algorithms (EA), and Physics-based algorithms (PhA), and Human-based algorithms. SI algorithms include a group of algorithms inspired by swarms and animals' social behaviors, such as [5, 6, 7]. The EA algorithms are proposed by simulating biological evolutionary behaviors, for example, mutation, crossover, and selections, such as [8]. PhA algorithms are inspired by physical laws, such as [9, 10]. Human-based methods are inspired by some human behavior, such as [11].

Generally, all of these MH algorithms have standard features, such as the searching process, which in general has two phases, the first one called diversification (exploration), and the second phase called intensification (exploitation) [12, 13]. In the first phase, the MH algorithm generates random operators to explore different search space regions. In the second phase, the optimization method tries to find the optimal solution from the search space. Therefore, an efficient MH optimization algorithm has to balance the exploration and exploitation phase tendencies to avoid trapping at local optima.

We intend to introduce a more productive and effective algorithm; this paper introduces a novel natural-inspired based meta-heuristic optimization algorithm, called Aquila Optimizer (AO). The proposed AO algorithm simulates the Aquila's behavior during hunting in which showing the actions of each step of the hunt. A set of twenty-three classical, thirty CEC2017, and ten CEC2019 test functions is used to verify the robustness and effectiveness of the proposed AO rigorously. Moreover, seven engineering design problems are used to investigate the proposed AO's effectiveness further in solving real-world problems.

The rest of this study is as follows: Section 2 describes the introduced meta-heuristic optimization algorithms' backgrounds. Section 3 illustrates the structure of the proposed AO. In Section 4, we evaluate the proposed AO with different optimization problems. Also, the comparisons with state-of-art methods are presented. Finally, Section 5 concludes the study.

## 2. Related Work

This section presents a light review of some selected MH algorithms that belong to the four mentioned types and highlight some of their applications in recent years.

### 2.1. Swarm Intelligence (SI) algorithms

Swarms inspire (SI) methods and animal behaviors in nature [14]. Scholars and researchers have proposed different SI algorithms. Here we highlight some of these algorithms as follows. One of the most popular SI

algorithms is the Particle Swarm Optimization (PSO), which is inspired by swarm particles' natural behaviors, in which each particle represents a candidate solution. Then each particle can be updated according to the global best position and its local position[5]. In the previous decades, the PSO has been employed to solve different problems, for example, to solve global optimization problems, document classification, image segmentation, feature selection [15], data clustering, and also other industrial and engineering problems and applications [16]. Some ant species foraging behaviors inspire the Ant Colony Optimization (ACO) [6]. In nature, ants deposit pheromone on the ground to mark the optimal path that needs to be followed by the colony members [17]. It has received wide attention, and it has been applied in different optimization tasks. For example, data mining, vehicle routing problems, classification, feature selection, time series prediction, and others [18].

Artificial Bee Colony (ABC) is inspired by the behaviors of the honey bee colony. It has three collections, employed bees to search for food resources, onlooker bees to choose the food sources, and scout bees to randomly search for food sources[7]. The ABC has been used in many optimization applications, such as image segmentation, global optimization, wireless sensor network, job shop scheduling problems, and others. Firefly Algorithm (FA) is inspired by flashing light of fireflies in oceans [19]. It also received wide attentions and has been adopted in different applications, such as image processing, feature selection, and other optimization problems. In addition, there are many SI algorithms that proposed in literature, and they showed good performances in various optimization tasks, such as Cuckoo Search (CS) Algorithm [20], Whale Optimization Algorithm WOA [21], Salp Swarm Algorithm (SSA) [22], Moth Flame Optimization (MFO) [23], Marine Predators Algorithm (MPA) [24], Lion Optimization Algorithm (LOA) [25], Grasshopper Optimization Algorithm [26], Emperor Penguin Optimizer [27], and Squirrel Search Algorithm [28].

## 2.2. Evolutionary Algorithms (EA)

Several EA algorithms have been proposed in the literature to solve optimization problems based on biological evolution's natural behaviors. Here we present several examples of the EA algorithms. The Genetic Algorithm (GA) is the most popular EA algorithm. It was developed by Holland [8], which inspired by the Darwinian theory of evolution. It has received wide attention and has been employed in many applications. For example, face recognition, feature selection, network anomaly detection, scheduling problems, and many other engineering applications and problems [29]. Differential evolution (DE) is presented by Storn and Price [30]. Also, it has been applied in various optimization tasks, such as, image classification, global optimization, text classification, parallel machine scheduling, and others. Other popular EA-based

MH algorithms confirmed their performance in various optimization tasks, including Biogeography-Based Optimizer (BBO) [31], and Invasive Tumor Growth [32].

### 2.3. Physics-based algorithms (PhA)

PhA algorithms depend on the physical law to propose solutions to optimization tasks. Among PhA algorithms, we list some efficient PhA based optimization algorithms as follows. Big Bang–Big Crunch (BBBC) is one of the popular MH algorithms inspired by the evolution of the universe [33]. It has been utilized by researchers in different fields, such as data clustering, global optimization, classification problems, different engineering designs, and others. Gravitational Search Algorithm (GSA) is inspired by the law of gravity and mass interactions [9]. Also, it received wide attention and has been used to improve and solve various applications and problems. For example, image segmentation, feature selection, global optimization, engineering designs, and others. Multi-verse Optimizer (MVO) [10] is inspired by the multi-verses theory in physics. In recent years, MVO has been employed to solve several problems, such as global optimization problems, time series forecasting, image segmentation, feature selection, and others. Also, there are other PhA based MH algorithms, such as Central Force Optimization (CFO) [34], and Henry gas solubility optimization (HGSO) [4].

### 2.4. Human-based Algorithms

By simulating some natural human behaviors, researchers proposed several MH algorithms for solving optimization problems. Here, we highlight some of these methods as follows. Teaching based learning algorithm (TBLA) [35] is inspired by the influence of a teacher on the output of learners in the class. It has been applied to solve various problems such as constrained optimization problems [36] and various problems such as [37]. Socio Evolution Learning Optimization Algorithm (SELOA) [11] is proposed by simulating the social learning behavior of humans organized as families in a societal setup. Furthermore, other popular MH algorithms, such as sine cosine algorithm [38], and volleyball Premier League Algorithm [39]. Table 1 summarizes several popular MH algorithms.

Generally, population-based optimization algorithms start the optimization processes (improvement processes) by selecting candidate solutions randomly. These created solutions are evolutionary improved by the optimization rules and evaluated by a specific objective function iteratively, the optimization techniques' nature. Since optimization algorithms endeavor to find the optimal or near-optimal solution for the given optimization problems stochastically, finding a solution in a single run is not guaranteed [46, 47]. However,



Table 1: A summary of popular MH algorithms

| Type        | Algorithm                                                 | Ref. | Inspired by                                                |
|-------------|-----------------------------------------------------------|------|------------------------------------------------------------|
| SI          | Particle Swarm Optimization (PSO)                         | [5]  | The natural behaviors of swarm particles                   |
|             | Ant Colony Optimization (ACO)                             | [6]  | Ants deposit pheromone on the ground                       |
|             | Artificial Bee Colony (ABC)                               | [7]  | The behaviors of the honey bees colony                     |
|             | Firefly Algorithm (FA)                                    | [19] | Flashing light of fireflies in oceans                      |
|             | Cuckoo Search (CS)                                        | [20] | The behavior of cuckoo breeding parasitism                 |
|             | Whale Optimization Algorithm (WOA)                        | [21] | The behavior of humpback whales                            |
|             | Salp Swarm Algorithm (SSA)                                | [22] | The behavior of salps navigating in oceans                 |
|             | Moth Flame Optimization (MFO)                             | [23] | The moths navigation method in nature                      |
|             | Lion Optimization Algorithm (LOA)                         | [25] | Lifestyle and cooperation of lions                         |
|             | Marine Predators Algorithm (MPA)                          | [24] | predators foraging strategy in oceans                      |
|             | Squirrel Search Algorithm (SSA)                           | [28] | The behavior of southern flying squirrels                  |
|             | Grasshopper Optimization Algorithm (GOA)                  | [26] | The behavior of grasshopper swarms                         |
| EA          | Golden Eagle Optimizer (GEO)                              | [40] | The behavior of golden eagles in tuning speed              |
|             | Genetic Algorithm (GA)                                    | [8]  | Darwinian theory of evolution                              |
|             | Differential evolution (DE)                               | [30] | the natural phenomenon of evolution                        |
|             | Biogeography-Based Optimizer (BBO)                        | [31] | Biogeography related to species migration                  |
|             | Invasive Tumor Growth (ITG)                               | [32] | Kidney process.                                            |
|             | Tree Growth Algorithm (TGA)                               | [41] | Competition of trees for acquiring foods and light         |
| PhA         | Arithmetic Optimization Algorithm (AOA)                   | [42] | The distribution behavior of the main arithmetic operators |
|             | Big Bang–Big Crunch (BBBC)                                | [33] | The evolution of the universe                              |
|             | Gravitational Search Algorithm (GSA)                      | [9]  | The law of gravity and mass interactions                   |
|             | Multi-verse Optimizer (MVO)                               | [10] | multi-verses theory                                        |
|             | Central Force Optimization (CFO)                          | [34] | The metaphor of gravitational kinematics                   |
|             | Henry Gas Solubility Optimization (HGSO)                  | [4]  | The behavior of Henry's law                                |
|             | Thermal Exchange Optimization (TEO)                       | [43] | Newton's law of cooling                                    |
| Human based | Electromagnetic Field Optimization (EFO)                  | [44] | The behavior of electromagnets                             |
|             | Teaching based learning algorithm (TBLA)                  | [35] | The influence of a teacher on the output of learners       |
|             | Collective Decision Optimization (CSO)                    | [45] | Human decision-making characteristics                      |
| Others      | Socio Evolution & Learning Optimization Algorithm (SELOA) | [11] | Social learning behavior of humans                         |
|             | Volleyball Premier League Algorithm (VPLA)                | [39] | Competitions of volleyball teams                           |
|             | Sine Cosine Algorithm (SCA)                               | [38] | Sine and cosine functions                                  |

the probability of obtaining the optimal global solution for the given problem is grown by a sufficient number of random solutions and evolutionary iterations.

Despite the variations between optimization algorithms in population-based meta-heuristic methods, the optimization process is divided into two main phases: exploration/diversification versus exploitation/intensification [48, 49]. This refers to the wide coverage of the search space by utilizing different search solutions of the used algorithm to avoid the searching problems.

### 3. Aquila Optimizer (AO)

In this section, the proposed nature-inspired algorithm, called Aquila Optimizer (AO), is presented as follows.

#### 3.1. Inspiration and behavior of Aquila during hunting

In the Northern Hemisphere, the Aquila is one of the most popular birds of prey. Aquila is the most common spread species of the Aquila. Similar to all birds, Aquila belongs to the group “Accipitridae”. Typically, Aquila is dark brown, with lighter Golden-brown plumage on their back of a neck. Young Aquila

of this group mainly has white color on the tail, and usually, their wings have minor white marks. Aquila uses its speed and agility united with sturdy feet and large, sharpened talons to grab various prey, mainly rabbits, hares, deers, marmots, squirrels, and other ground animals [50]. Aquila and their distinctive behaviors can be observed in nature.

Aquila keeps territories that may be as high as  $200 \text{ km}^2$ . They create large nests in mountains and other high positions. The breeding actions occur in the spring; they are monogamous and may survive together for many years or probably throughout life. Females produce up to 4 eggs and later incubate them for 6 weeks. Typically, one or two newborns live to fledge in about 12 weeks. These young Aquila usually achieve complete confidence in the fall, following which they move widely to building territory for themselves.

Due to its hunting bravery, Aquila is one of the most studied birds globally. Male Aquila got significantly more prey when solo-hunting. Aquila utilizes their speed and sharp talons to hunt squirrels, rabbits, and many other animals. They have even been recognized as an attacker for full-grown deer [51]. The next most notable animal in the diet of Aquila is the ground squirrels.

Mainly, four hunting methods are recognized to be used by the Aquila, with many distinct differences and most Aquila's ability to cleverly and quickly vary back and forth between hunting methods relying on the situations. The following points express the hunting methods of Aquila.

- The first method, high soar with a vertical stoop, is utilized for hunting birds in flight, where the Aquila rises at a high level over the ground. Once it explores prey, the Aquila enters a long, low-angled glide with speed rising as the wings close further. The Aquila needs a height feature over its prey for the success of this method. Just before the engagement, the wings and tail are unfolded, and feet are pushed ahead to grab the prey to look like a clap of thunder [52].
- The second method, contour flight with short glide attack, is recognized as the most usually used method by Aquila, where the Aquila rises at a low level over the ground. The prey is then hounded closely, whether the prey is running or flying. This method is beneficial for hunting ground squirrels, breeding grouse, or seabirds [53].
- The third method is a low flight with a slow descent attack. In this, the Aquila lows to the ground, and next onslaught progressively on the prey. The Aquila selects its victim and lands on the prey's neck and back, trying to penetrate. This hunting method is utilized for slow prey, such as rattlesnakes, hedgehogs, foxes, and tortoises, or any prey with an absence of escape response [54].
- The fourth method is walking and grab prey, in which the Aquila walks on the land and tries to pull

its prey. It is utilized for pulling the young of large prey (i.e., deer or sheep) out of the coverage area [55].

In conclusion, Aquila is one of the most intelligent and skillful hunters and probably next after humans. The main inspiration for the proposed AO algorithm is derived from the methods mentioned above. The following subsections describe how these processes are modeled in the AO.

### 3.2. Solutions initialization

In AO, it is a population-based method, the optimization rule begins with the population of candidate solutions ( $X$ ) as presented in Equation (1), which is generated stochastically between the upper bound ( $UB$ ) and lower bound ( $LB$ ) of the given problem. The best-obtained solution, so far, is determined as the optimal solution approximately in each iteration.

$$X = \begin{bmatrix} x_{1,1} & \cdots & x_{1,j} & x_{1,Dim-1} & x_{1,Dim} \\ x_{2,1} & \cdots & x_{2,j} & \cdots & x_{2,Dim} \\ \cdots & \cdots & x_{i,j} & \cdots & \cdots \\ \vdots & \vdots & \vdots & \vdots & \vdots \\ x_{N-1,1} & \cdots & x_{N-1,j} & \cdots & x_{N-1,Dim} \\ x_{N,1} & \cdots & x_{N,j} & x_{N,Dim-1} & x_{N,Dim} \end{bmatrix} \quad (1)$$

where  $X$  denotes a set of current candidate solutions, which are generated randomly by using Equation (2),  $X_i$  denotes to the decision values (positions) of the  $i^{th}$  solution,  $N$  is the total number of candidate solutions (population), and  $Dim$  denotes to the dimension size of the problem.

$$X_{ij} = rand \times (UB_j - LB_j) + LB_j, \quad i = 1, 2, \dots, N \quad j = 1, 2, \dots, Dim \quad (2)$$

where  $rand$  is a random number,  $LB_j$  denotes to the  $j^{th}$  lower bound, and  $UB_j$  denotes to the  $j^{th}$  upper bound of the given problem.

### 3.3. Mathematical model of AO

The proposed AO algorithm simulates Aquila's behavior during hunting in which showing the actions of each step of the hunt. Hence, the optimization procedures of the proposed AO algorithm are represented in four methods; selecting the search space by high soar with the vertical stoop, exploring within a diverge search space by contour flight with short glide attack, exploiting within a converge search space by low

flight with slow descent attack, and swooping by walk and grab prey. The AO algorithm can transfer from exploration steps to exploitation steps using different behaviors based on this condition if  $t \leq (\frac{2}{3}) * T$  the exploration steps will be excited; otherwise, the exploitation steps will be executed.

We modeled Aquila behaviors as a mathematical optimization paradigm, and it is determining the best solution subjected to specific constraints. The mathematical model of the AO is proposed as follows.

### 3.3.1. Step 1: Expanded exploration ( $X_1$ )

In the first method ( $X_1$ ), the Aquila recognizes the prey area and selects the best hunting area by high soar with the vertical stoop. Here, the AO widely explorers from high soar to determine the area of the search space, where the prey is. Figure 1 shows the behavior of the Aquila high soar with the vertical stoop. This behavior is mathematically presented as in Equation (3).

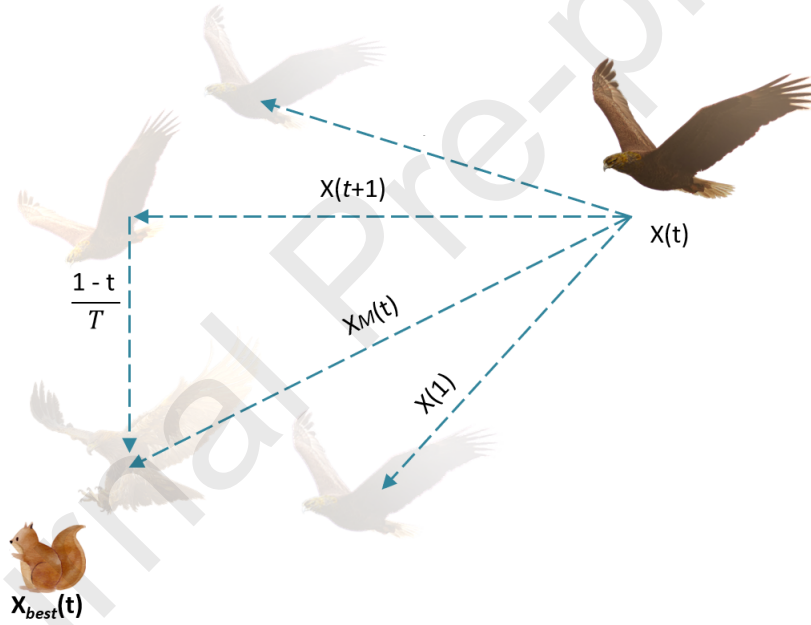

Figure 1: The behavior of the Aquila high soar with the vertical stoop.

$$X_1(t+1) = X_{best}(t) \times \left(1 - \frac{t}{T}\right) + (X_M(t) - X_{best}(t) * rand), \quad (3)$$

where,  $X_1(t+1)$  is the solution of the next iteration of  $t$ , which is generated by the first search method ( $X_1$ ).  $X_{best}(t)$  is the best-obtained solution until  $t^{th}$  iteration, this reflects the approximate place of the prey. This equation  $(\frac{1-t}{T})$  is used to control the expanded search (exploration) through the number of iterations.  $X_M(t)$  denotes to the locations mean value of the current solutions connected at  $t^{th}$  iteration,

which is calculated using Equation (4). *rand* is a random value between 0 and 1. *t* and *T* present the current iteration and the maximum number of iteration, respectively.

$$X_M(t) = \frac{1}{N} \sum_{i=1}^N X_i(t), \forall j = 1, 2, \dots, Dim \quad (4)$$

where, *Dim* is the dimension size of the problem and *N* is the number of candidate solution (population size).

### 3.3.2. Step 2: Narrowed exploration ( $X_2$ )

In the second method ( $X_2$ ), when the prey area is found from a high soar, the Aquila circles above the target prey, prepares the land, and then attacks. This method called contour flight with short glide attack. Here, AO narrowly explores the selected area of the target prey in preparation for the attack. Figure 2 shows the behavior of the Aquila contour flight with short glide attack. This behavior is mathematically presented as in Equation (5).

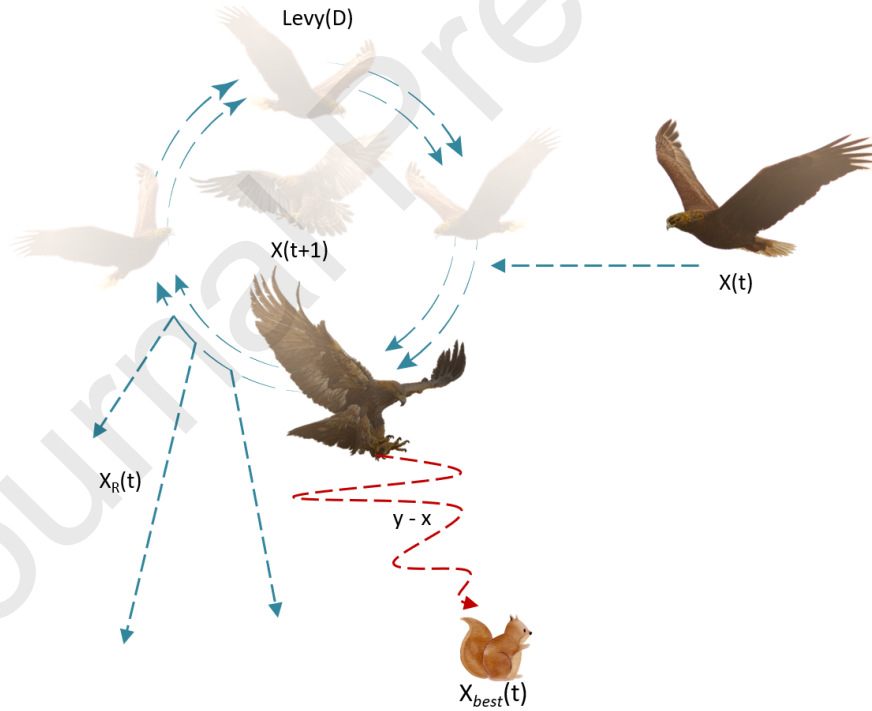

Figure 2: The behavior of the Aquila contour flight with short glide attack.

$$X_2(t+1) = X_{best}(t) \times Levy(D) + X_R(t) + (y - x) * rand, \quad (5)$$

where  $X_2(t+1)$  is the solution of the next iteration of  $t$ , which is generated by the second search method ( $X_2$ ).  $D$  is the dimension space, and  $Levy(D)$  is the levy flight distribution function, which is calculated using Equation (6).  $X_R(t)$  is a random solution taken in the range of  $[1 \ N]$  at the  $i^{th}$  iteration.

$$Levy(D) = s \times \frac{u \times \sigma}{|v|^{\frac{1}{\beta}}} \quad (6)$$

190 where  $s$  is a constant values fixed to 0.01,  $u$ , and  $v$  are random numbers between 0 and 1.  $\sigma$  is calculated using Equation (7).

$$\sigma = \left( \frac{\Gamma(1 + \beta) \times \sin(\frac{\pi\beta}{2})}{\Gamma(\frac{1+\beta}{2}) \times \beta \times 2^{(\frac{\beta-1}{2})}} \right) \quad (7)$$

where  $\beta$  is a constant value fixed to 1.5. In Equation (5),  $y$  and  $x$  are used to present the spiral shape in the search, which are calculated as follows.

$$y = r \times \cos(\theta) \quad (8)$$

$$x = r \times \sin(\theta) \quad (9)$$

where,

$$r = r_1 + U \times D_1 \quad (10)$$

$$\theta = -\omega \times D_1 + \theta_1 \quad (11)$$

$$\theta_1 = \frac{3 \times \pi}{2} \quad (12)$$

$r_1$  takes a value between 1 and 20 for fixed the number of search cycles, and  $U$  is a small value fixed to 0.00565.  $D_1$  is integer numbers from 1 to the length of the search space ( $Dim$ ), and  $\omega$  is a small value fixed to 0.005. Figure 3 shows the behavior of the AO in a spiral shape.

### 195 3.3.3. Step 3: Expanded exploitation ( $X_3$ )

In the third method ( $X_3$ ), when the prey area is specified accurately, and the Aquila is ready for landing and attack, the Aquila descends vertically with a preliminary attack to discover the prey reaction. This

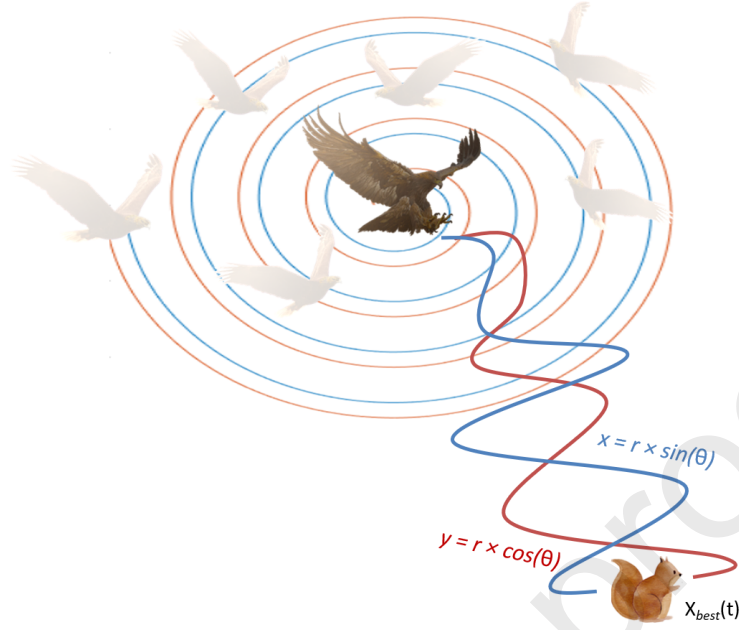

Figure 3: The behavior of the AO in a spiral shape.

method called low flight with slow descent attack. Here, AO exploits the selected area of the target to get close of prey and attack. Figure 4 shows the behavior of the Aquila low flight with a slow descent attack. This behavior is mathematically presented as in Equation (13).

$$X_3(t+1) = (X_{best}(t) - X_M(t)) \times \alpha - rand + ((UB - LB) \times rand + LB) \times \delta, \quad (13)$$

where  $X_3(t+1)$  is the solution of the next iteration of  $t$ , which is generated by the third search method ( $X_3$ ).  $X_{best}(t)$  refers to the approximate location of the prey until  $i^{th}$  iteration (the best-obtained solution), and  $X_M(t)$  denotes to the mean value of the current solution at  $t^{th}$  iteration, which is calculated using Equation (4).  $rand$  is a random value between 0 and 1.  $\alpha$  and  $\delta$  are the exploitation adjustment parameters fixed in this paper to a small value (0.1).  $LB$  denotes to the lower bound and  $UB$  denotes to the upper bound of the given problem.

#### 3.3.4. Step 4: Narrowed exploitation ( $X_4$ )

In the fourth method ( $X_4$ ), when the Aquila got close to the prey, the Aquila attacks the prey over the land according to their stochastic movements. This method called walk and grab prey. Here, and finally, AO attacks the prey in the last location. Figure 5 shows the behavior of the Aquila walk and grab prey. This behavior is mathematically presented as in Equation (14).

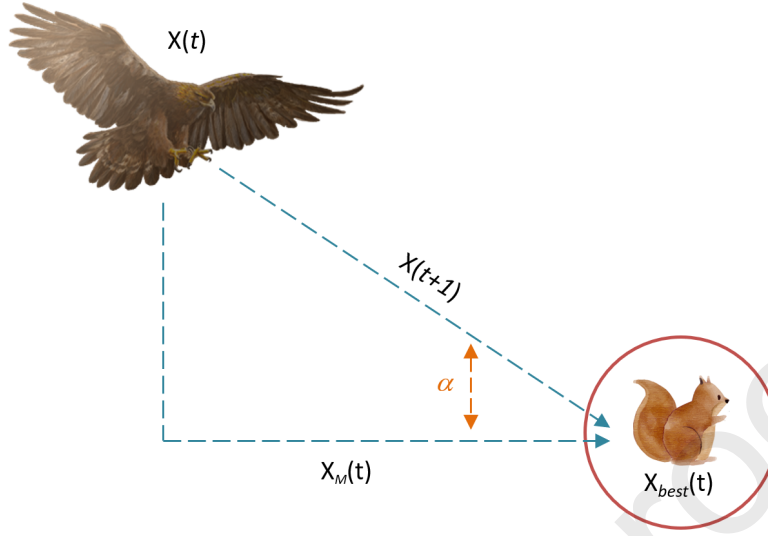

Figure 4: The behavior of the Aquila low flight with slow descent attack.

$$X_4(t+1) = QF \times X_{best}(t) - (G_1 \times X(t) \times rand) - G_2 \times Levy(D) + rand \times G_1, \quad (14)$$

where  $X_4(t+1)$  is the solution of the next iteration of  $t$ , which is generated by the fourth search method ( $X_3$ ).  $QF$  denotes to a quality function used to equilibrium the search strategies, which is calculated using Equation (15).  $G_1$  denotes various motions of the AO that are used to track the prey during the elope, which is generated using Equation (16).  $G_2$  presents decreasing values from 2 to 0, which denote the flight slope of the AO that is used to follow the prey during the elope from the first location (1) to the last location ( $t$ ), which is generated using Equation (17).  $X(t)$  is the current solution at the  $t$ -th iteration.

$$QF(t) = t^{\frac{2 \times rand() - 1}{(1-T)^2}} \quad (15)$$

$$G_1 = 2 \times rand() - 1 \quad (16)$$

$$G_2 = 2 \times (1 - \frac{t}{T}) \quad (17)$$

$QF(t)$  is the quality function value at the  $t^{th}$  iteration, and  $rand$  is a random value between 0 and 1.  $t$  and  $T$  present the current iteration and the maximum number of iteration, respectively.  $Levy(D)$  is the levy flight distribution function calculated using Equation (6). Figure 6 shows the effects of the quality function



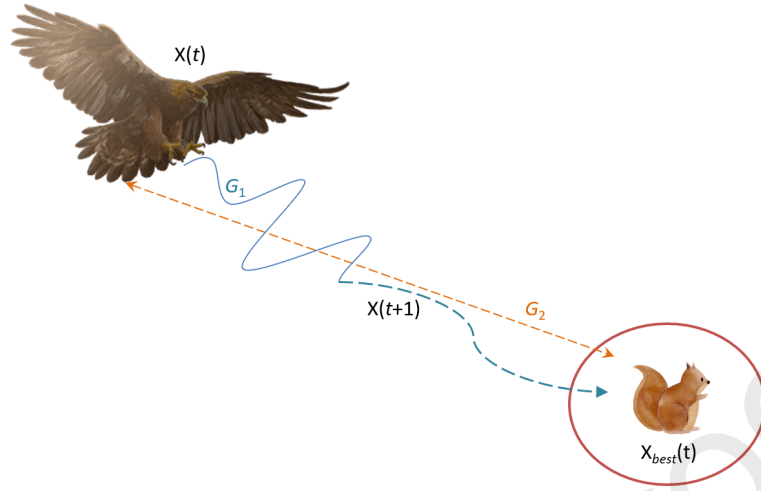

Figure 5: The behavior of the Aquila walk and grab prey.

(QF),  $G_1$ , and  $G_2$  on the behavior of the AO.

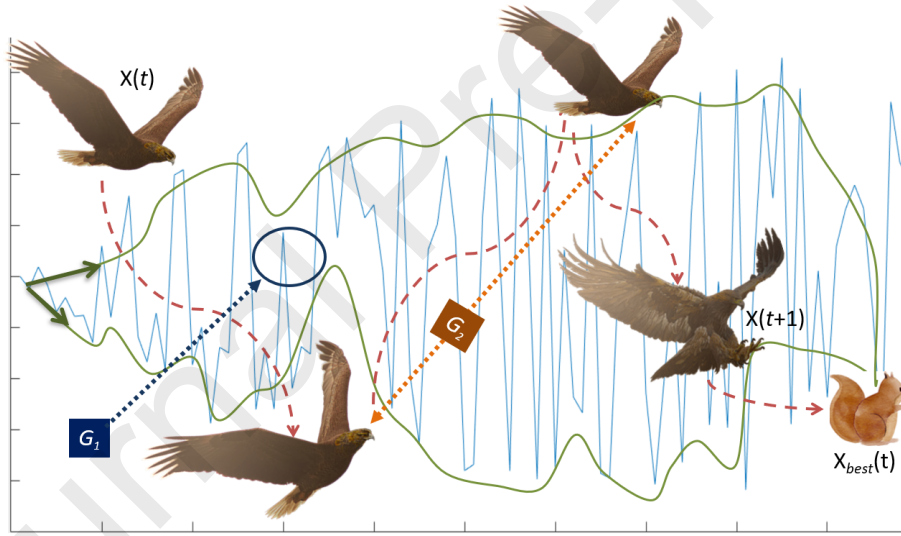

Figure 6: The effects of the quality function (QF),  $G_1$ , and  $G_2$  on the behavior of the AO.

#### 3.4. Pseudo-code of the Aquila Optimizer (AO)

To recap, in AO, the optimization start the improvement procedures by generating a random predefined set of candidate solutions, called population. Through the trajectory of repetition, the search strategies of the AO explore the reasonable positions of the near-optimal solution or the best-obtained solution. Each solution updates its positions according to the best-obtained solution by the optimization processes of the AO. To emphasize the equilibrium between the search strategies of the AO (i.e., exploration and exploitation), four

different search strategies for the exploration and exploitation are provided (i.e., expanded exploration, narrowed exploration, expanded exploitation, and narrowed exploitation). Finally, the search process of the

225

AO is terminated when the end criterion is met. The Pseudo-code of the AO is detailed in Algorithm 1.

---

**Algorithm 1** Aquila Optimizer

---

```

1: Initialization phase:
2: Initialize the population  $X$  of the GEO.
3: Initialize the parameters of the GEO (i.e.,  $\alpha$ ,  $\delta$ , etc).
4: while (The end condition is not met) do
5:   Calculate the fitness function values.
6:    $X_{best}(t)$  = Determine the best obtained solution according to the fitness values.
7:   for ( $i=1, 2, \dots, N$ ) do
8:     Update the mean value of the current solution  $X_M(t)$ .
9:     Update the  $x$ ,  $y$ ,  $G_1$ ,  $G_2$ , Levy(D), etc.
10:    if  $t \leq (\frac{2}{3}) * T$  then
11:      if  $rand \leq 0.5$  then
12:        {  $\triangleright$  Step 1: Expanded exploration ( $X_1$ ) }
13:        Update the current solution using Equation (3).
14:        if  $Fitness(X_1(t+1)) < Fitness(X(t))$  then
15:           $X(t) = (X_1(t+1))$ 
16:          if  $Fitness(X_1(t+1)) < Fitness(X_{best}(t))$  then
17:             $X_{best}(t) = X_1(t+1)$ 
18:          end if
19:        end if
20:      else
21:        {  $\triangleright$  Step 2: Narrowed exploration ( $X_2$ ) }
22:        Update the current solution using Equation (5).
23:        if  $Fitness(X_2(t+1)) < Fitness(X(t))$  then
24:           $X(t) = (X_2(t+1))$ 
25:          if  $Fitness(X_2(t+1)) < Fitness(X_{best}(t))$  then
26:             $X_{best}(t) = X_2(t+1)$ 
27:          end if
28:        end if
29:      end if
30:    else
31:      if  $rand \leq 0.5$  then
32:        {  $\triangleright$  Step 3: Expanded exploitation ( $X_3$ ) }
33:        Update the current solution using Equation (13).
34:        if  $Fitness(X_3(t+1)) < Fitness(X(t))$  then
35:           $X(t) = (X_3(t+1))$ 
36:          if  $Fitness(X_3(t+1)) < Fitness(X_{best}(t))$  then
37:             $X_{best}(t) = X_3(t+1)$ 
38:          end if
39:        end if
40:      else
41:        {  $\triangleright$  Step 4: Narrowed exploitation ( $X_4$ ) }
42:        Update the current solution using Equation (14).
43:        if  $Fitness(X_4(t+1)) < Fitness(X(t))$  then
44:           $X(t) = (X_4(t+1))$ 
45:          if  $Fitness(X_4(t+1)) < Fitness(X_{best}(t))$  then
46:             $X_{best}(t) = X_4(t+1)$ 
47:          end if
48:        end if
49:      end if
50:    end if
51:  end for
52: end while
53: return The best solution ( $X_{best}$ ).

```

---

### 3.5. Computational complexity of the Aquila Optimizer (AO)

In this section, the general computational complexity of the AO is presented. The computational complexity of the AO typically relies on three rules: solutions initialization, calculate the fitness functions, and updating of solutions. Assume that,  $N$  is the number of solutions,  $O(N)$  is the computational complexity

of the solutions' initialization processes. The computational complexity of the solutions' updating processes is  $O(T \times N) + O(T \times N \times Dim)$ , which consists of exploring for the best positions and updating the solutions' positions of all solutions, where the total number of iterations is called  $T$  and the dimension size of the given problem is called  $Dim$ . Accordingly, the total computational complexity of the proposed AO is  $O(N \times (T \times D + 1))$ .

#### 4. Experimental results and discussions

The current investigation appraises the performance of the AO using numerous test benchmark functions and real-world optimization problems. Three series of well-regarded functions suit including twenty-three classical functions, twenty-nine CEC2017 benchmarks, and ten CEC2019 benchmarks are utilized in the numerical validation stage; moreover, seven engineering optimization problems are employed as examples for the real-world applications. The AO has been implemented for 500 iterations with 30 search agents to solve the considered test benchmarks and engineering applications. In order to examine the consistency and reliability of the AO, it has been executed for 30 independent times at this the average of the results (Average), standard deviation (STD), worst-so-far solutions, and best-so-far ones have been reported. To confirm the AO quality, it has been compared with a wide range of meta-heuristic optimization algorithms by using Friedman's mean rank test to demonstrate the AO superiority described in the following sections. To achieve a fair comparison, the considered algorithms have implemented the same number of iterations and population size of AO 500, 30, respectively.

##### 4.1. Definition of twenty-three classical test functions

To assess the AO's in exploring the search space, exploiting the global solutions, and escaping from the local minima, twenty-three benchmark functions include unimodal, multimodal, and fixed dimension multimodal functions. The Unimodal test benchmarks (F1-F7), in Table 2, are applied to examine the AO's exploitation ability. While, the set of multimodal benchmarks (F8-F13), in Table 3, are designed to test the AO's exploration tendency. These two sets of benchmarks are employed in 10, 50, 100, and 500 dimensions. The fixed dimension multimodal test benchmarks (F14-F23) of Table 4 show the ability of AO in exploration the search space in the low dimensions. Numerous of well-established optimization algorithms including Grasshopper Optimization Algorithm (GOA) [56], Equilibrium Optimizer (EO) [57], Particle Swarm Optimization (PSO) [58], Dragonfly Algorithm (DA) [59], Ant Lion Optimizer (ALO) [48], Grey Wolf Optimizer (GWO) [60], Marine Predators Algorithm (MPA) [61], Salp Swarm Algorithm (SSA)

[47], Sine Cosine Algorithm (SCA) [38], Whale Optimization Algorithm (WOA) [21], and Slime Mould  
 Algorithm (SMA) [62] have been tested with the same benchmarks set to show the superiority of the  
 proposed AO. Table 5 summaries the parameter settings of the counterparts algorithms. The iterations  
 number and population size have been tuned as 500 and 50, respectively, for all the investigated methods  
 with 30 independent runs. The analysis has been performed on MATLAB 2018 platform using PC an Intel  
 Core i5, 2.2 GHz CPU and 16GB of RAM.

Table 2: Unimodal benchmark functions.

| Function | Description                                                      | Dimensions       | Range      | $f_{min}$ |
|----------|------------------------------------------------------------------|------------------|------------|-----------|
| F1       | $f(x) = \sum_{i=1}^n x_i^2$                                      | 10, 50, 100, 500 | [-100,100] | 0         |
| F2       | $f(x) = \sum_{i=0}^n  x_i  + \prod_{i=0}^n  x_i $                | 10, 50, 100, 500 | [-10,10]   | 0         |
| F3       | $f(x) = \sum_{i=1}^n (\sum_{j=1}^i x_j)^2$                       | 10, 50, 100, 500 | [-100,100] | 0         |
| F4       | $f(x) = \max_i \{ x_i , 1 \leq i \leq n\}$                       | 10, 50, 100, 500 | [-100,100] | 0         |
| F5       | $f(x) = \sum_{i=1}^{n-1} [100(x_i^2 - x_{i+1})^2 + (1 - x_i)^2]$ | 10, 50, 100, 500 | [-30,30]   | 0         |
| F6       | $f(x) = \sum_{i=1}^n ([x_i + 0.5])^2$                            | 10, 50, 100, 500 | [-100,100] | 0         |
| F7       | $f(x) = \sum_{i=0}^n ix_i^4 + \text{random}[0,1)$                | 10, 50, 100, 500 | [-128,128] | 0         |

Table 3: Multimodal benchmark functions.

| Function | Description                                                                                                                                                                                                                                                                                                             | Dimensions       | Range        | $f_{min}$     |
|----------|-------------------------------------------------------------------------------------------------------------------------------------------------------------------------------------------------------------------------------------------------------------------------------------------------------------------------|------------------|--------------|---------------|
| F8       | $f(x) = \sum_{i=1}^n (-x_i \sin(\sqrt{ x_i }))$                                                                                                                                                                                                                                                                         | 10, 50, 100, 500 | [-500,500]   | -418.9829 × n |
| F9       | $f(x) = \sum_{i=1}^n [x_i^2 - 10 \cos(2\pi x_i) + 10]$                                                                                                                                                                                                                                                                  | 10, 50, 100, 500 | [-5.12,5.12] | 0             |
| F10      | $f(x) = -20 \exp(-0.2 \sqrt{\frac{1}{n} \sum_{i=1}^n x_i^2}) - \exp(\frac{1}{n} \sum_{i=1}^n \cos(2\pi x_i)) + 20 + e$                                                                                                                                                                                                  | 10, 50, 100, 500 | [-32,32]     | 0             |
| F11      | $f(x) = 1 + \frac{1}{4000} \sum_{i=1}^n x_i^2 - \prod_{i=1}^n \cos(\frac{x_i}{\sqrt{i}})$                                                                                                                                                                                                                               | 10, 50, 100, 500 | [-600,600]   | 0             |
| F12      | $f(x) = \frac{\pi}{n} \{10 \sin(\pi y_1)\} + \sum_{i=1}^{n-1} (y_i - 1)^2 [1 + 10 \sin^2(\pi y_{i+1}) + \sum_{i=1}^n u(x_i, 10, 100, 4)]$ , where $y_i = 1 + \frac{x_i + 1}{4}, u(x_i, a, k, m) = \begin{cases} K(x_i - a)^m & \text{if } x_i > a \\ 0 & -a \leq x_i \leq a \\ K(-x_i - a)^m & -a \leq x_i \end{cases}$ | 10, 50, 100, 500 | [-50,50]     | 0             |
| F13      | $f(x) = 0.1(\sin^2(3\pi x_1) + \sum_{i=1}^n (x_i - 1)^2 [1 + \sin^2(3\pi x_i + 1)] + (x_n - 1)^2 1 + \sin^2(2\pi x_n)) + \sum_{i=1}^n u(x_i, 5, 100, 4)$                                                                                                                                                                | 10, 50, 100, 500 | [-50,50]     | 0             |

#### 4.1.1. Qualitative analysis for the convergence of AO

To validate the developed AO model's performance, the convergence and the trajectory are used as in  
 Figure 7. This figure depicts the qualitative measures, such as the 2D shape of the function (as in the first  
 column), to discuss the search space's topology—the search history of the solutions (second column). The  
 average fitness value, trajectory, and convergence curve in the third, fourth, and fifth columns.

In general, the search's history discusses the interaction between the glad and prey. It improves the  
 behavior of the AO to determine the modality of the collective search of glads. This modality represents  
 the movements of the glads around the optimal point in the case of unimodal functions. While in the case

Table 4: Fixed-dimension multimodal benchmark functions.

| Function | Description                                                                                                                                                                              | Dimensions | Range    | $f_{min}$ |
|----------|------------------------------------------------------------------------------------------------------------------------------------------------------------------------------------------|------------|----------|-----------|
| F14      | $f(x) = \left( \frac{1}{500} + \sum_{j=1}^{25} \frac{1}{j + \sum_{i=1}^j (x_i - a_{ij})} \right)^{-1}$                                                                                   | 2          | [-65,65] | 1         |
| F15      | $f(x) = \sum_{i=1}^{11} \left[ a_i - \frac{x_1(b_i^2 + b_i x_2)}{b_i^2 + b_i x_3 + x_4} \right]^2$                                                                                       | 4          | [-5,5]   | 0.00030   |
| F16      | $f(x) = 4x_1^2 - 2.1x_1^4 + \frac{1}{3}x_1^6 + x_1x_2 - 4x_2^2 + 4x_2^4$                                                                                                                 | 2          | [-5,5]   | -1.0316   |
| F17      | $f(x) = (x_2 - \frac{5.1}{4\pi^2}x_1^2 + \frac{5}{\pi}x_1 - 6)^2 + 10(1 - \frac{1}{8\pi})\cos x_1 + 10$                                                                                  | 2          | [-5,5]   | 0.398     |
| F18      | $f(x) = \frac{[1 + (x_1 + x_2 + 1)^2(19 - 14x_1 + 3x_1^2 - 14x_2 + 6x_1x_2 + 3x_2^2)] \times [30 + (2x_1 - 3x_2)^2 \times (18 - 32x_1 + 12x_1^2 + 48x_2 - 36x_1x_2 + 27x_2^2)]}{\times}$ | 2          | [-2,2]   | 3         |
| F19      | $f(x) = -\sum_{i=1}^4 c_i \exp \left( -\sum_{j=1}^3 a_{ij} (x_j - p_{ij})^2 \right)$                                                                                                     | 3          | [-1,2]   | -3.86     |
| F20      | $f(x) = -\sum_{i=1}^4 c_i \exp \left( -\sum_{j=1}^6 a_{ij} (x_j - p_{ij})^2 \right)$                                                                                                     | 6          | [0,1]    | -.32      |
| F21      | $f(x) = -\sum_{i=1}^5 [(X - a_i)(X - a_i)^T + c_i]^{-1}$                                                                                                                                 | 4          | [0,1]    | -10.1532  |
| F22      | $f(x) = -\sum_{i=1}^7 [(X - a_i)(X - a_i)^T + c_i]^{-1}$                                                                                                                                 | 4          | [0,1]    | -10.4028  |
| F23      | $f(x) = -\sum_{i=1}^{10} [(X - a_i)(X - a_i)^T + c_i]^{-1}$                                                                                                                              | 4          | [0,1]    | -10.5363  |

Table 5: Parameter values for the comparative algorithms.

| Algorithm | Parameter                     | Value                            |
|-----------|-------------------------------|----------------------------------|
| GOA       | $l$                           | 1.5                              |
|           | $f$                           | 0.5                              |
| EO        | $r$                           | 0.5                              |
|           | $a$                           | 4                                |
|           | $GP$                          | 0.5                              |
| PSO       | Topology                      | Fully connected                  |
|           | Cognitive and social constant | (C1, C2) 2, 2                    |
|           | Inertia weight                | Linear reduction from 0.9 to 0.1 |
|           | Velocity limit                | 10% of dimension range           |
| DA        | $w$                           | 0.2-0.9                          |
|           | $s$ , $a$ , and $c$           | 0.1                              |
|           | $f$ and $e$                   | 1                                |
| ALO       | $I$ ratio                     | $10^w$                           |
|           | $w$                           | 2-6                              |
| GWO       | Convergence parameter ( $a$ ) | Linear reduction from 2 to 0     |
| MPA       | $\gamma$                      | $\gamma_i 1$                     |
|           | $P$                           | 0.0                              |
| SSA       | $v_0$                         | 0                                |
| SCA       | -                             | -                                |
| WOA       | $\alpha$                      | Decreased from 2 to 0            |
|           | $b$                           | 2                                |
| SMA       | $vb$ and $vc$                 | Decreased from 2 to 0            |

of multimodal functions, the modality represents the scattering properties of glads. All of these modality characteristics enhance the exploration and exploitation abilities when AO is used to solve multimodal and unimodal functions, respectively.

Moreover, from the third column that represents the average fitness value overall the solutions among the number of iteration, it can be observed that the average fitness value at the beginning iterations is high. However, before the number of iterations reached 50, the average becomes small, which indicates that the AO requires a small number of iterations to convergence to the optimal solution. From the trajectory of the solution (as in the fourth column), it can be seen that the solution has a high magnitude and frequency at the early iterations. At the last iterations, they have nearly vanished. This illustrates AO's high exploration

ability at the early iterations and good exploitation at the last iterations. Based on this behavior, AO has a high chance of reaching the optimal solution.

It can be noticed from the convergence curve (last column in Figure 7) that there are variant types of patterns based on the tested functions. For example, for the unimodal functions, their convergence curves are smooth. It needs a small number of iterations to be enhanced. The convergence curve is similar to step-wise for the multimodal functions because this type is more complex than unimodal functions.

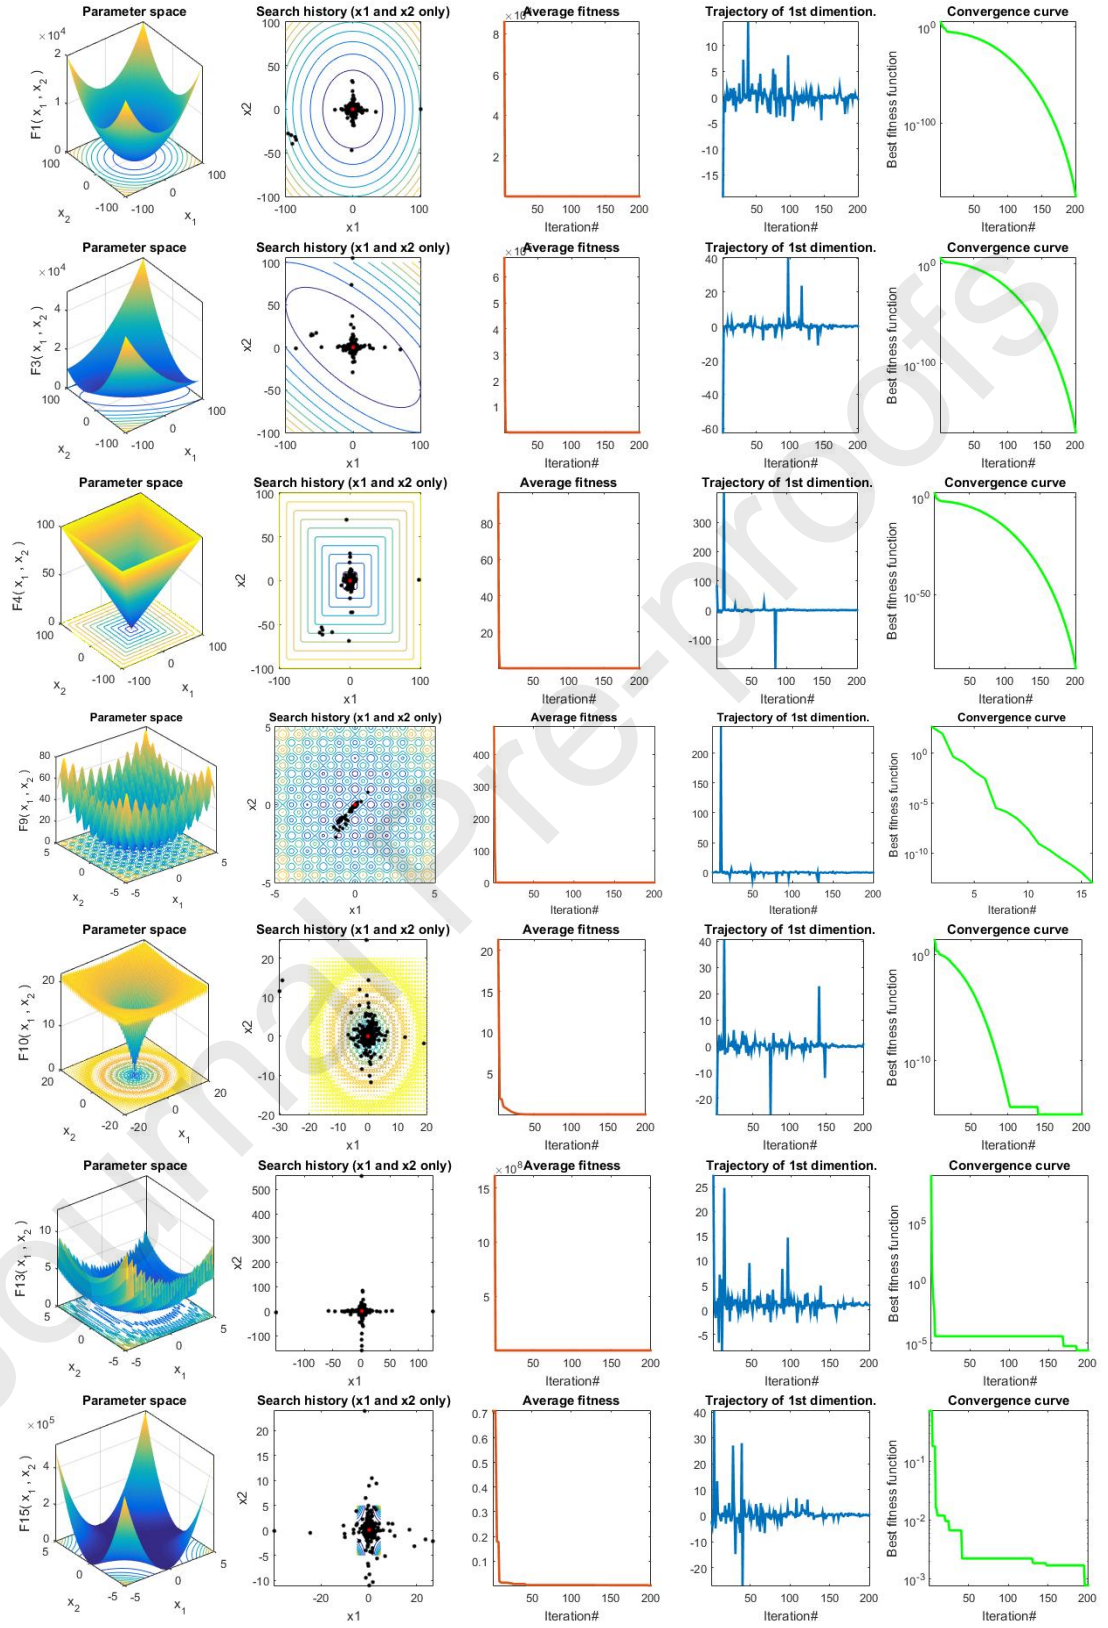



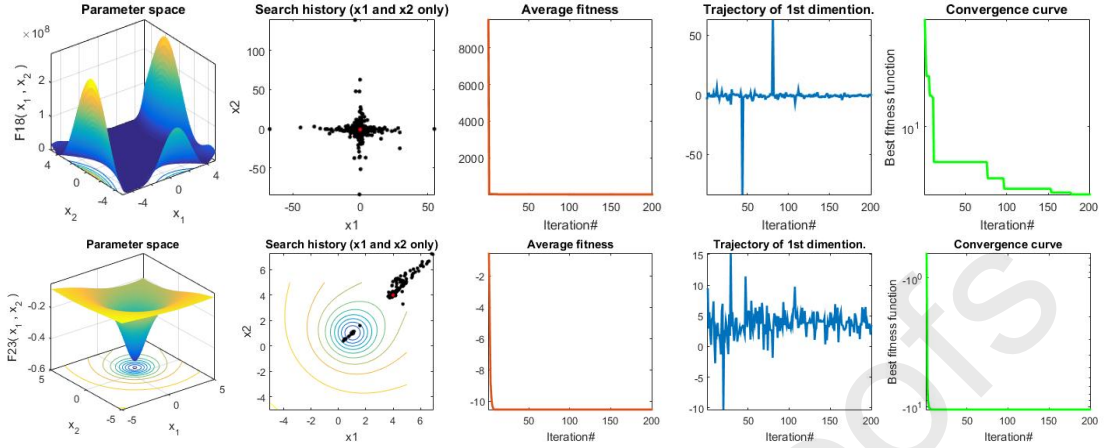

Figure 7: Qualitative results for the studied problems

#### 4.1.2. Parameters analysis of the AO

In this section, we test the effect of changing the value of AO's parameters on its performance. In general, there are two main parameters in AO, so we put different scenarios according to the value of these parameters. These parameters are evaluated at one value from 0.1, 0.5, and 0.9; therefore, we have nine scenarios (as in Table 6).

Table 7 depicts the statistical results obtained at each scenario among nine functions (i.e., F1, F3, F5, F6, F7, F9, F11, F12, and F13). From these results, it can be noticed that the first scenario (i.e.,  $\alpha = 0.1$  and  $\delta = 0.1$ ) among all the tested functions has better results overall in other scenarios. Followed by fourth and seventh scenarios that allocated the second and third rank, respectively. However, it can be observed that AO's performance at all of these scenarios is similar at F1, F3, F9, and F11. Also, by comparing the first scenario (at low value) with scenario 9 (at high value), it can be noticed that the AO at the first scenario wins two times while at another scenario not win. AO lost only three times in the first scenario, but AO using the ninth scenario, lost five times. The seventh scenario has the same analysis as the first scenario. However, it allocates the third rank with a small difference from the first scenario.

The impact of the number of solutions (i.e.,  $N$ ) is examined on several benchmark functions. To appropriately analyze the AO's parameter sensitivity, we tested several numbers of solutions (i.e., 10, 20, 30, 40, and 50) by comparing the changes in the number of solution parameters throughout 100 iterations. It can be seen from the obtained results in Figure 8 that when uses many population sizes, the proposed AO method keeps its advantages, which means that AO is more robust and less overwhelmed by the population size. As shown in this figure, it is also clear that the change in the number of solutions in the first example (F23) did not affect the algorithm's ability to solve this problem. For F12 and F13, it was clear that the



Table 6: Scenarios of the tuning parameters.

| Scenario No. | $\alpha$ value | $\delta$ value |
|--------------|----------------|----------------|
| 1            | 0.1            | 0.1            |
| 2            | 0.1            | 0.5            |
| 3            | 0.1            | 0.9            |
| 4            | 0.5            | 0.1            |
| 5            | 0.5            | 0.5            |
| 6            | 0.5            | 0.9            |
| 7            | 0.9            | 0.1            |
| 8            | 0.9            | 0.5            |
| 9            | 0.9            | 0.9            |

number of smaller solutions was less efficient than the rest at solving problems. Thus, we can say that the

310 best number of solutions is 30.

Table 7: The influence of the AO parameters (i.e.,  $\alpha$  and  $\delta$ ) tested on various classical test functions.

| Fun No. | Scenario No. |            |            |            |            |            |            |            |            |
|---------|--------------|------------|------------|------------|------------|------------|------------|------------|------------|
| Measure | Scenario 1   | Scenario 2 | Scenario 3 | Scenario 4 | Scenario 5 | Scenario 6 | Scenario 7 | Scenario 8 | Scenario 9 |
| F1      |              |            |            |            |            |            |            |            |            |
| Worst   | 0.0000E+00   | 0.0000E+00 | 0.0000E+00 | 0.0000E+00 | 0.0000E+00 | 0.0000E+00 | 0.0000E+00 | 0.0000E+00 | 0.0000E+00 |
| Average | 0.0000E+00   | 0.0000E+00 | 0.0000E+00 | 0.0000E+00 | 0.0000E+00 | 0.0000E+00 | 0.0000E+00 | 0.0000E+00 | 0.0000E+00 |
| Best    | 0.0000E+00   | 0.0000E+00 | 0.0000E+00 | 0.0000E+00 | 0.0000E+00 | 0.0000E+00 | 0.0000E+00 | 0.0000E+00 | 0.0000E+00 |
| STD     | 0.0000E+00   | 0.0000E+00 | 0.0000E+00 | 0.0000E+00 | 0.0000E+00 | 0.0000E+00 | 0.0000E+00 | 0.0000E+00 | 0.0000E+00 |
| F3      |              |            |            |            |            |            |            |            |            |
| Worst   | 0.0000E+00   | 0.0000E+00 | 0.0000E+00 | 0.0000E+00 | 0.0000E+00 | 0.0000E+00 | 0.0000E+00 | 0.0000E+00 | 0.0000E+00 |
| Average | 0.0000E+00   | 0.0000E+00 | 0.0000E+00 | 0.0000E+00 | 0.0000E+00 | 0.0000E+00 | 0.0000E+00 | 0.0000E+00 | 0.0000E+00 |
| Best    | 0.0000E+00   | 0.0000E+00 | 0.0000E+00 | 0.0000E+00 | 0.0000E+00 | 0.0000E+00 | 0.0000E+00 | 0.0000E+00 | 0.0000E+00 |
| STD     | 0.0000E+00   | 0.0000E+00 | 0.0000E+00 | 0.0000E+00 | 0.0000E+00 | 0.0000E+00 | 0.0000E+00 | 0.0000E+00 | 0.0000E+00 |
| F5      |              |            |            |            |            |            |            |            |            |
| Worst   | 3.5452E-03   | 1.2003E-02 | 1.0688E+00 | 2.4860E-03 | 7.7249E-02 | 1.5643E-01 | 9.2393E-03 | 8.7626E-02 | 1.9360E-01 |
| Average | 7.5563E-04   | 5.3272E-03 | 3.7669E-01 | 9.3808E-04 | 2.3046E-02 | 6.1452E-02 | 2.9616E-03 | 3.0283E-02 | 3.5318E-02 |
| Best    | 3.0716E-05   | 4.9156E-05 | 2.5972E-03 | 2.1377E-05 | 2.6727E-04 | 3.3591E-03 | 4.8392E-05 | 2.5782E-04 | 2.3909E-04 |
| STD     | 1.2825E-03   | 4.6059E-03 | 4.3612E-01 | 8.1676E-04 | 2.4598E-02 | 6.8500E-02 | 2.9794E-03 | 3.6559E-02 | 6.6042E-02 |
| F6      |              |            |            |            |            |            |            |            |            |
| Worst   | 9.3433E-04   | 1.4871E-03 | 1.6305E-03 | 4.5867E-04 | 1.6101E-03 | 1.8361E-03 | 2.5836E-04 | 5.0271E-04 | 1.2255E-02 |
| Average | 1.2866E-04   | 3.2509E-04 | 2.6693E-04 | 8.3540E-05 | 5.7930E-04 | 7.1889E-04 | 6.4938E-05 | 1.3677E-04 | 3.2565E-03 |
| Best    | 8.9132E-08   | 1.2406E-05 | 1.8149E-07 | 4.0921E-09 | 9.8538E-07 | 2.0150E-05 | 9.8426E-08 | 2.4579E-06 | 1.9958E-05 |
| STD     | 3.2581E-04   | 4.8124E-04 | 5.5469E-04 | 1.5817E-04 | 5.6937E-04 | 6.5062E-04 | 9.6101E-05 | 2.0381E-04 | 4.2484E-03 |
| F7      |              |            |            |            |            |            |            |            |            |
| Worst   | 2.4857E-03   | 6.0771E-04 | 9.8470E-04 | 1.8054E-03 | 7.5880E-04 | 1.5938E-03 | 2.5689E-03 | 2.2417E-03 | 1.5480E-03 |
| Average | 6.7149E-04   | 3.4123E-04 | 3.8074E-04 | 6.1805E-04 | 3.0839E-04 | 9.4638E-04 | 8.1345E-04 | 5.7466E-04 | 5.3287E-04 |
| Best    | 7.4363E-05   | 9.3075E-05 | 7.2355E-05 | 1.6019E-05 | 2.6660E-06 | 3.0243E-04 | 5.4588E-05 | 7.3517E-05 | 2.0936E-05 |
| STD     | 8.1515E-04   | 1.8032E-04 | 3.1235E-04 | 5.8056E-04 | 2.8467E-04 | 4.2589E-04 | 7.7100E-04 | 7.0843E-04 | 4.7333E-04 |
| F9      |              |            |            |            |            |            |            |            |            |
| Worst   | 0.0000E+00   | 0.0000E+00 | 0.0000E+00 | 0.0000E+00 | 0.0000E+00 | 0.0000E+00 | 0.0000E+00 | 0.0000E+00 | 0.0000E+00 |
| Average | 0.0000E+00   | 0.0000E+00 | 0.0000E+00 | 0.0000E+00 | 0.0000E+00 | 0.0000E+00 | 0.0000E+00 | 0.0000E+00 | 0.0000E+00 |
| Best    | 0.0000E+00   | 0.0000E+00 | 0.0000E+00 | 0.0000E+00 | 0.0000E+00 | 0.0000E+00 | 0.0000E+00 | 0.0000E+00 | 0.0000E+00 |
| STD     | 0.0000E+00   | 0.0000E+00 | 0.0000E+00 | 0.0000E+00 | 0.0000E+00 | 0.0000E+00 | 0.0000E+00 | 0.0000E+00 | 0.0000E+00 |
| F11     |              |            |            |            |            |            |            |            |            |
| Worst   | 0.0000E+00   | 0.0000E+00 | 0.0000E+00 | 0.0000E+00 | 0.0000E+00 | 0.0000E+00 | 0.0000E+00 | 0.0000E+00 | 0.0000E+00 |
| Average | 0.0000E+00   | 0.0000E+00 | 0.0000E+00 | 0.0000E+00 | 0.0000E+00 | 0.0000E+00 | 0.0000E+00 | 0.0000E+00 | 0.0000E+00 |
| Best    | 0.0000E+00   | 0.0000E+00 | 0.0000E+00 | 0.0000E+00 | 0.0000E+00 | 0.0000E+00 | 0.0000E+00 | 0.0000E+00 | 0.0000E+00 |
| STD     | 0.0000E+00   | 0.0000E+00 | 0.0000E+00 | 0.0000E+00 | 0.0000E+00 | 0.0000E+00 | 0.0000E+00 | 0.0000E+00 | 0.0000E+00 |
| F12     |              |            |            |            |            |            |            |            |            |
| Worst   | 2.5953E-06   | 2.4913E-04 | 6.0485E-04 | 1.4918E-05 | 6.8346E-03 | 3.9597E-04 | 8.0765E-05 | 2.5108E-04 | 1.8653E-03 |
| Average | 1.0423E-06   | 7.3327E-05 | 1.4308E-04 | 6.6588E-06 | 8.7494E-04 | 1.3414E-04 | 2.4816E-05 | 4.3581E-05 | 2.9459E-04 |
| Best    | 2.2313E-08   | 7.3942E-07 | 6.3818E-07 | 3.1857E-07 | 4.2849E-08 | 6.2585E-06 | 2.2365E-07 | 3.7318E-08 | 3.2924E-07 |
| STD     | 9.3764E-07   | 9.8852E-05 | 2.2879E-04 | 5.9844E-06 | 2.4083E-03 | 1.3325E-04 | 3.3871E-05 | 8.5033E-05 | 6.4205E-04 |
| F13     |              |            |            |            |            |            |            |            |            |
| Worst   | 4.4032E-04   | 2.1265E-03 | 4.8500E-03 | 2.0505E-04 | 5.4268E-04 | 1.9890E-03 | 3.1063E-04 | 9.6081E-04 | 2.4658E-03 |
| Average | 7.2669E-05   | 3.8436E-04 | 6.7492E-04 | 8.4223E-05 | 1.2665E-04 | 5.3678E-04 | 4.8247E-05 | 4.0248E-04 | 8.1892E-04 |
| Best    | 9.3142E-08   | 5.7119E-06 | 7.0224E-06 | 7.4176E-07 | 2.6086E-06 | 2.8230E-06 | 2.9500E-07 | 1.8673E-05 | 4.4407E-05 |
| STD     | 1.4966E-04   | 7.2191E-04 | 1.6890E-03 | 8.3966E-05 | 1.8606E-04 | 7.5516E-04 | 1.0756E-04 | 4.5882E-04 | 8.4563E-04 |
| (W/L/T) | (2 3 4)      | (0 5 4)    | (0 5 4)    | (0 5 4)    | (1 4 4)    | (0 5 4)    | (2 3 4)    | (0 5 4)    | (0 5 4)    |
| Mean    | 2.0000E+00   | 2.8889E+00 | 4.0000E+00 | 2.1111E+00 | 3.3333E+00 | 4.6667E+00 | 2.2222E+00 | 3.2222E+00 | 4.5556E+00 |
| Ranking | 1            | 4          | 7          | 2          | 6          | 9          | 3          | 5          | 8          |

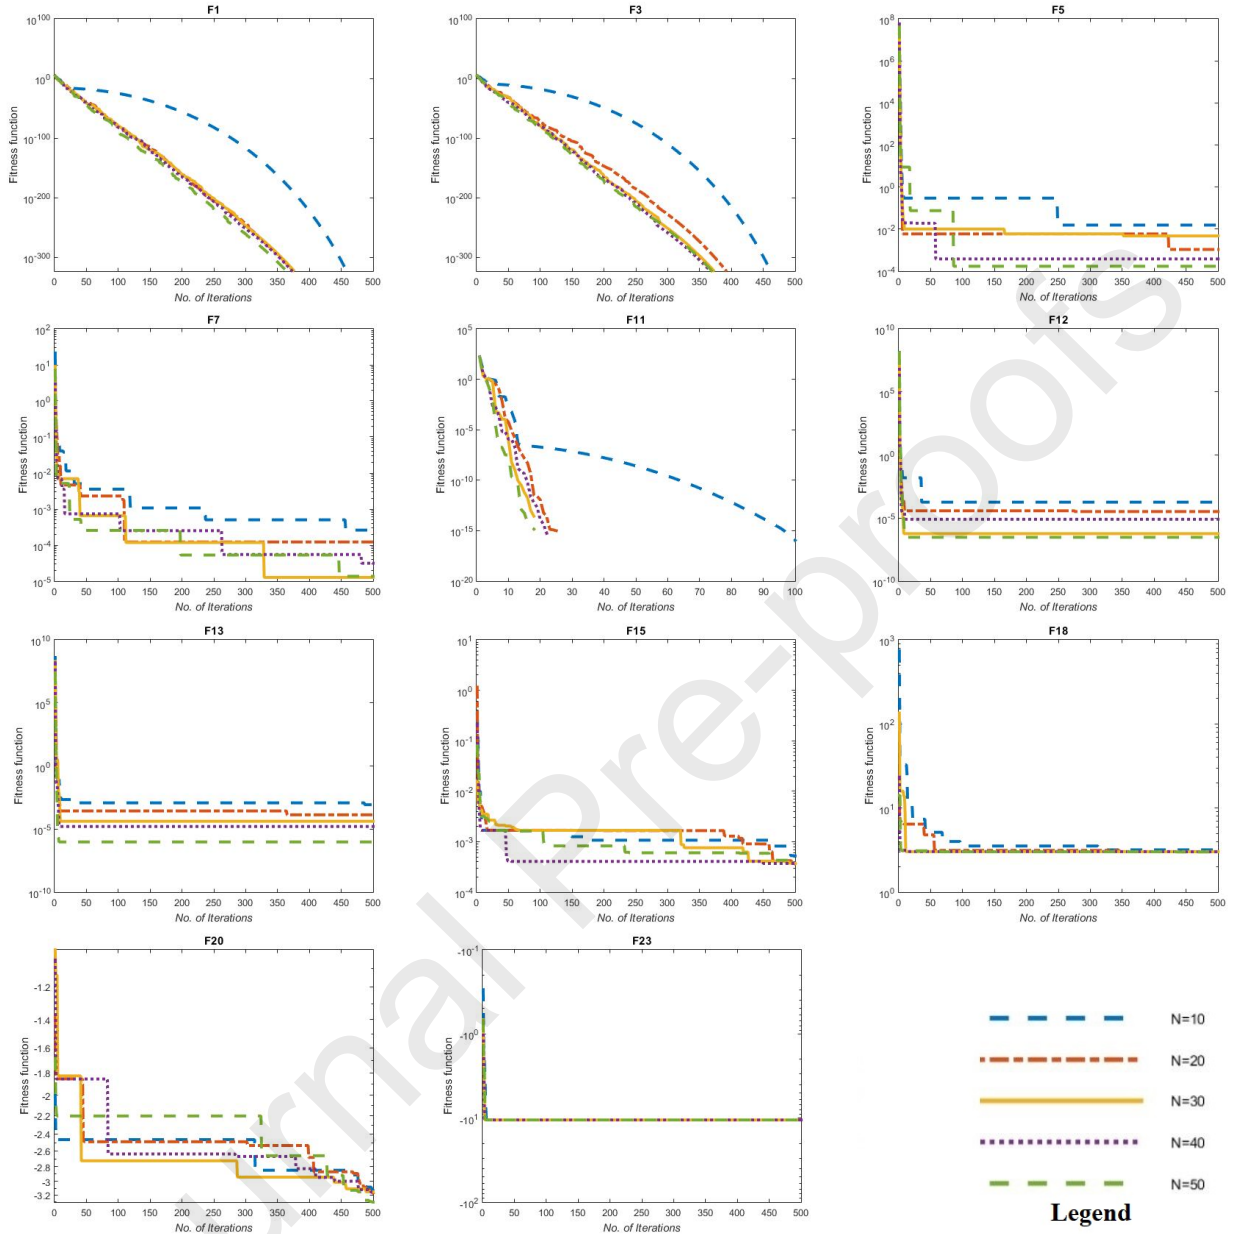

Figure 8: The influence of the AO population size (i.e., number of solutions ( $N$ )) tested on various classical test functions.

#### 4.1.3. Intensification capability of the AO

The set of unimodal functions of (F1-F7) have been employed to examine AO's ability in exploiting the global solutions as this suite of functions has only one global optimum. Table 8 displays AO and other recent competitors' results on the studied unimodal benchmarks (F1-F7). The results include the worst-so-far solutions, the Average and STD values across the number of independent runs, and the best-so-far solutions that have been involved. The attained values confirm the superiority of the AO as it prevails over

the other peers in achieving the minimal values of the best-so-far solutions and the worst-so-far solutions and the Average values with high reliability and consistency (minimum STD) for six functions of this set. The SMA achieves the least mean value for F7 while the GWO and AO occupy the second and third positions for this function's mean value.

Nonetheless, the AO offers the least best value for F7. Through this observation, one can see the AO's high ability in the intensification (exploitation) of the optimal solutions. This feature proceeds from its main procedures; the proposed AO has two exploitation strategies to focus on the local search area mainly (i.e., expanded exploitation and narrowed exploitation). This encourages the optimization process during the search to focus on the local area widely and narrowly.

#### 4.1.4. Diversification capability of AO

The multiple local optima of the multimodal benchmarks are the recommended gate to examine the MHs' exploration (diversification) capacity. Two multimodal test functions are applied while testing the AO, multidimensional (F8-F13) and fixed-dimensional test functions (F14-F23). The worst, average, best, and STD values of the studied functions set are illustrated in Tables 8-9 for multidimensional (F8-F13), and fixed-dimensional (F14-F23) functions, respectively. The results of the tables reveal that the AO outperforms the other peers in the majority of the high dimensional multimodal benchmarks (see Table 8) as it provides the minimum statistical metrics values (worst, average, best, and STD) in five functions out of six from this set. The SMA is the best competitor for F8, as shown in Table 8. For low (fixed) dimensional multimodal benchmarks (F14-F23) (see Table 9), the AO attains the best performance for half of this set. In order to have meaningful statistical results, three lines of Tables 8 and 9 have been reported to display statistical analysis for the implemented algorithms across the course of the studied functions to demonstrate the superiority of AO. The first line shows three symbols (W|L|T) that denote the number of the functions in which the performance of the algorithm is the best (win) | indistinguishable (tie) | inferior to the others (loss). The second line refers to the Friedman mean rank. The third line illustrates the final rank values of the implemented algorithms. As per those lines, one can see that the AO exhibits the best performance in the majority of the multimodal benchmarks; that is why it occupied the first position as a final rank in comparison with the other peers. The reason behind this performance is that the proposed AO has two exploration strategies to focus on the global search area mainly (i.e., expanded exploration and narrowed exploitation). This helps the algorithm discover the search-land space efficiently and with high quality compared to the other recently proved algorithms. These strategies lead the optimization process in two ways during the search on a wide search area (i.e., widely and narrowly).

Table 8: Results of the comparative methods on classical test functions (F1-F13), the dimension is fixed to 10.

| Fun No. | Comparative methods |             |             |             |             |             |             |             |             |             |             |             |
|---------|---------------------|-------------|-------------|-------------|-------------|-------------|-------------|-------------|-------------|-------------|-------------|-------------|
| Measure | AO                  | GOA         | EO          | PSO         | DA          | ALO         | GWO         | MPA         | SSA         | SCA         | WOA         | SMA         |
| F1      |                     |             |             |             |             |             |             |             |             |             |             |             |
| Worst   | 0.0000E+00          | 3.6969E-04  | 7.7535E-55  | 6.2268E-19  | 2.3600E+01  | 1.4323E-07  | 1.4594E-48  | 1.0861E-29  | 1.4896E-09  | 8.0970E-10  | 2.9973E-69  | 1.6487E-209 |
| Average | 0.0000E+00          | 9.2301E-05  | 1.9446E-55  | 1.6757E-19  | 1.3050E+01  | 4.3784E-08  | 7.0295E-49  | 5.1571E-30  | 8.8917E-10  | 2.0351E-10  | 1.0157E-69  | 2.3553E-210 |
| Best    | 0.0000E+00          | 4.5311E-06  | 4.3340E-58  | 2.8877E-21  | 9.4062E-01  | 1.3931E-08  | 3.3951E-51  | 4.8287E-31  | 4.5257E-10  | 2.2968E-15  | 1.2964E-74  | 0.0000E+00  |
| STD     | 0.0000E+00          | 1.5720E-04  | 3.3159E-55  | 2.5923E-19  | 8.5620E+00  | 5.6212E-08  | 5.5804E-49  | 3.9049E-30  | 4.0621E-10  | 3.4922E-10  | 1.4278E-69  | 0.0000E+00  |
| F2      |                     |             |             |             |             |             |             |             |             |             |             |             |
| Worst   | 3.2140E-217         | 8.0714E+00  | 1.7385E-32  | 5.6805E-09  | 5.0004E+00  | 1.8234E+00  | 5.0478E-27  | 2.6606E-16  | 1.6008E-01  | 1.9284E-08  | 7.0476E-49  | 3.3909E-102 |
| Average | 9.4973E-218         | 1.9913E+00  | 4.7530E-33  | 1.8197E-09  | 2.6815E+00  | 6.5730E-01  | 1.8314E-27  | 1.1119E-16  | 3.2973E-02  | 7.1625E-09  | 1.4120E-49  | 4.8441E-103 |
| Best    | 6.5477E-225         | 4.2831E-02  | 4.4565E-34  | 1.8509E-10  | 1.1170E+00  | 2.0566E-05  | 5.2330E-29  | 1.5592E-17  | 7.8584E-06  | 2.2667E-11  | 2.3267E-54  | 4.0840E-185 |
| STD     | 0.0000E+00          | 3.4564E+00  | 7.1132E-33  | 2.3197E-09  | 1.4933E+00  | 9.0885E-01  | 2.2740E-27  | 1.2968E-16  | 7.1078E-02  | 9.7874E-09  | 3.1504E-49  | 1.2816E-102 |
| F3      |                     |             |             |             |             |             |             |             |             |             |             |             |
| Worst   | 0.0000E+00          | 7.9216E+00  | 1.3672E-26  | 8.9441E-05  | 2.2990E+02  | 3.5658E+01  | 5.9319E-19  | 8.8997E-13  | 1.6144E-02  | 1.5833E+00  | 9.1052E+02  | 5.9474E-170 |
| Average | 0.0000E+00          | 2.3721E+00  | 2.7965E-27  | 2.4370E-05  | 1.5135E+02  | 9.7732E+00  | 1.4430E-19  | 2.9489E-13  | 3.2460E-03  | 3.1907E-01  | 4.1977E+02  | 8.4963E-171 |
| Best    | 0.0000E+00          | 7.6675E-01  | 3.2828E-30  | 3.0206E-07  | 4.9375E+01  | 7.7055E-01  | 5.8410E-22  | 4.3286E-15  | 5.5017E-06  | 8.7897E-06  | 1.8044E+01  | 0.0000E+00  |
| STD     | 0.0000E+00          | 3.1152E+00  | 6.0803E-27  | 3.7242E-05  | 6.6986E+01  | 1.4868E+01  | 2.5214E-19  | 4.1003E-13  | 7.2100E-03  | 7.0675E-01  | 3.7377E+02  | 0.0000E+00  |
| F4      |                     |             |             |             |             |             |             |             |             |             |             |             |
| Worst   | 3.4546E-217         | 3.6825E-01  | 4.5050E-18  | 9.0690E-04  | 5.4895E+00  | 1.4412E-01  | 5.9612E-15  | 8.9567E-13  | 6.6264E-04  | 4.2456E-03  | 1.0180E+01  | 4.1196E-106 |
| Average | 9.9112E-218         | 1.6042E-01  | 9.0972E-19  | 2.4924E-04  | 3.1205E+00  | 3.4159E-02  | 2.1428E-15  | 4.8253E-13  | 1.7262E-04  | 1.3333E-03  | 3.1560E+00  | 6.2423E-107 |
| Best    | 2.3220E-221         | 8.7472E-02  | 7.2504E-22  | 2.0935E-05  | 1.5899E+00  | 1.0461E-03  | 2.3617E-16  | 2.3066E-13  | 1.6171E-05  | 4.3787E-06  | 2.1035E-03  | 4.1535E-184 |
| STD     | 0.0000E+00          | 1.1778E-01  | 2.0099E-18  | 3.7336E-04  | 1.6164E+00  | 6.1690E-02  | 2.2515E-15  | 2.7060E-13  | 2.7860E-04  | 1.8792E-03  | 4.0482E+00  | 1.5416E-106 |
| F5      |                     |             |             |             |             |             |             |             |             |             |             |             |
| Worst   | 7.2509E-03          | 4.7288E+02  | 5.8178E+00  | 7.6530E+00  | 1.2150E+04  | 2.1338E+02  | 8.0599E+00  | 8.8155E+00  | 6.4316E+02  | 8.2314E+00  | 8.9311E+00  | 8.2833E+00  |
| Average | 1.8851E-03          | 1.3186E+02  | 5.5290E+00  | 4.9164E+00  | 2.7086E+03  | 1.1610E+02  | 6.9905E+00  | 8.7760E+00  | 1.8700E+02  | 7.6830E+00  | 7.6503E+00  | 6.6668E+00  |
| Best    | 5.8588E-05          | 3.5924E+00  | 5.3001E+00  | 1.0189E-01  | 1.3482E+02  | 5.9959E+00  | 6.2379E+00  | 8.7560E+00  | 7.8930E+00  | 7.2782E+00  | 6.8245E+00  | 1.3987E-01  |
| STD     | 2.5151E-03          | 1.9815E-02  | 2.4395E-02  | 2.8429E+00  | 5.2795E+03  | 1.0654E+02  | 7.6379E-01  | 2.3773E-02  | 2.5958E+02  | 4.4474E-01  | 8.2650E-01  | 2.9165E+00  |
| F6      |                     |             |             |             |             |             |             |             |             |             |             |             |
| Worst   | 1.9689E-04          | 7.2259E-04  | 8.5541E-14  | 2.0342E-16  | 4.5832E+01  | 1.1796E-07  | 5.3267E-06  | 8.6068E-11  | 9.3625E-01  | 5.1611E-01  | 2.3389E-01  | 1.1110E-03  |
| Average | 6.3114E-05          | 2.2305E-04  | 4.1139E-14  | 4.3574E-17  | 1.6905E+01  | 3.2933E-08  | 3.5900E-06  | 2.8785E-11  | 6.1533E-01  | 4.1137E-01  | 5.0174E-02  | 4.7827E-04  |
| Best    | 7.2800E-08          | 3.7020E-07  | 4.8416E-16  | 2.8863E-21  | 1.0348E+00  | 7.9036E-09  | 2.5332E-06  | 3.7619E-12  | 3.1269E-01  | 2.9111E-01  | 1.1980E-03  | 2.0744E-04  |
| STD     | 8.9617E-05          | 2.9549E-04  | 3.2871E-14  | 8.9572E-17  | 1.8622E+01  | 4.7742E-08  | 1.1089E-06  | 3.2764E-11  | 2.3594E-01  | 9.6704E-02  | 1.0272E-01  | 3.9987E-04  |
| F7      |                     |             |             |             |             |             |             |             |             |             |             |             |
| Worst   | 1.5929E-03          | 1.5150E-01  | 1.8674E-03  | 1.6135E-02  | 4.2162E-02  | 6.1820E-02  | 1.3368E-03  | 2.1653E-03  | 3.6384E-02  | 3.8409E-03  | 8.9085E-03  | 9.9489E-04  |
| Average | 8.2851E-04          | 1.0781E-01  | 1.3129E-03  | 9.4087E-03  | 2.4046E-02  | 3.4906E-02  | 6.4406E-04  | 1.0836E-03  | 2.1775E-02  | 2.4214E-03  | 5.2117E-03  | 4.9240E-04  |
| Best    | 3.6048E-05          | 5.4523E-02  | 7.1835E-04  | 3.9634E-03  | 7.3884E-03  | 1.6443E-02  | 3.9526E-04  | 3.9490E-04  | 1.3986E-02  | 1.4779E-03  | 1.9935E-03  | 6.3985E-05  |
| STD     | 4.8479E-04          | 4.8920E-04  | 4.3669E-04  | 4.3669E-03  | 1.6416E-02  | 1.9059E-02  | 3.8935E-04  | 7.1962E-04  | 8.7354E-03  | 6.9575E-04  | 3.3316E-03  | 3.9987E+00  |
| F8      |                     |             |             |             |             |             |             |             |             |             |             |             |
| Worst   | -1.4073E+03         | -2.4131E+03 | -2.6410E+03 | -1.5161E+03 | -2.5770E+03 | -2.0333E+03 | -2.2885E+03 | -3.2378E+03 | -2.4891E+03 | -1.9022E+03 | -2.5990E+03 | -4.1892E+03 |
| Average | -2.2694E+03         | -2.7474E+03 | -3.1952E+03 | -2.1103E+03 | -2.7496E+03 | -2.4552E+03 | -2.7077E+03 | -3.5326E+03 | -2.9844E+03 | -2.0030E+03 | -3.0851E+03 | -4.1895E+03 |
| Best    | -2.6958E+03         | -3.3212E+03 | -3.5946E+03 | -2.5933E+03 | -2.9985E+03 | -3.2226E+03 | -3.1415E+03 | -3.9514E+03 | -3.2590E+03 | -2.1001E+03 | -3.8213E+03 | -4.1898E+03 |
| STD     | 4.6187E+02          | 3.4712E+02  | 3.9090E+02  | 4.4304E+02  | 1.6458E+02  | 4.9743E+02  | 3.4845E+02  | 2.7177E+02  | 3.0091E+02  | 7.7952E+01  | 4.4698E+02  | 1.8346E-01  |
| F9      |                     |             |             |             |             |             |             |             |             |             |             |             |
| Worst   | 0.0000E+00          | 6.2682E+01  | 0.0000E+00  | 1.2934E+01  | 4.7290E+01  | 4.2783E+01  | 1.5144E+01  | 5.0275E-07  | 2.5869E+01  | 6.3709E+00  | 1.4211E-14  | 0.0000E+00  |
| Average | 0.0000E+00          | 4.3380E+01  | 0.0000E+00  | 5.6148E+00  | 3.1340E+01  | 3.1441E+01  | 4.3101E+00  | 1.0055E-07  | 1.4327E+01  | 1.2742E+00  | 2.8422E-15  | 0.0000E+00  |
| Best    | 0.0000E+00          | 2.8854E+01  | 0.0000E+00  | 1.9899E+00  | 1.0558E+01  | 1.5919E+01  | 0.0000E+00  | 0.0000E+00  | 5.9697E+00  | 2.7143E-12  | 0.0000E+00  | 0.0000E+00  |
| STD     | 0.0000E+00          | 1.4099E+01  | 0.0000E+00  | 4.3077E+00  | 1.5146E+01  | 1.1401E+01  | 6.6614E+00  | 2.2484E-07  | 8.7477E+00  | 2.8492E+00  | 6.3553E-15  | 0.0000E+00  |
| F10     |                     |             |             |             |             |             |             |             |             |             |             |             |
| Worst   | 8.8818E-16          | 3.5742E+00  | 4.4409E-15  | 1.1957E-09  | 1.2660E+01  | 2.0133E+00  | 1.5099E-14  | 7.9936E-15  | 2.8136E+00  | 6.9120E-06  | 7.9936E-15  | 8.8818E-16  |
| Average | 8.8818E-16          | 1.6781E+00  | 4.4409E-15  | 7.0605E-10  | 4.9842E+00  | 4.0282E-01  | 1.1546E-14  | 5.1514E-15  | 1.4882E+00  | 1.7246E-06  | 4.4409E-15  | 8.8818E-16  |
| Best    | 8.8818E-16          | 1.0370E-03  | 4.4409E-15  | 3.2066E-10  | 1.4270E+00  | 8.1753E-05  | 7.9936E-15  | 4.4409E-15  | 9.2279E-06  | 5.6642E-08  | 8.8818E-16  | 8.8818E-16  |
| STD     | 0.0000E+00          | 1.3033E+00  | 0.0000E+00  | 3.7348E-10  | 4.4356E+00  | 9.0030E-01  | 3.5527E-15  | 1.5888E-15  | 1.1045E+00  | 2.9457E-06  | 3.5527E-15  | 0.0000E+00  |
| F11     |                     |             |             |             |             |             |             |             |             |             |             |             |
| Worst   | 0.0000E+00          | 2.9456E-01  | 2.9518E-02  | 5.3434E-01  | 1.0454E+00  | 3.7635E-01  | 5.9217E-02  | 0.0000E+00  | 2.6543E-01  | 4.7349E-02  | 2.4588E-01  | 0.0000E+00  |
| Average | 0.0000E+00          | 2.5765E-01  | 5.9036E-03  | 2.4519E-01  | 5.8851E-01  | 2.3516E-01  | 1.3919E-02  | 0.0000E+00  | 1.9428E-01  | 1.2173E-02  | 9.7462E-02  | 0.0000E+00  |
| Best    | 0.0000E+00          | 1.9581E-01  | 0.0000E+00  | 1.0083E-01  | 6.5156E-02  | 1.2060E-01  | 0.0000E+00  | 0.0000E+00  | 1.3262E-01  | 6.6321E-12  | 0.0000E+00  | 0.0000E+00  |
| STD     | 0.0000E+00          | 4.1907E-02  | 1.3201E-02  | 1.7935E-01  | 3.7515E-01  | 1.1319E-01  | 2.5718E-02  | 0.0000E+00  | 5.8327E-02  | 2.0376E-02  | 1.3346E-01  | 0.0000E+00  |
| F12     |                     |             |             |             |             |             |             |             |             |             |             |             |
| Worst   | 1.0421E-04          | 3.5311E+00  | 6.8465E-14  | 2.8069E-19  | 4.6366E+00  | 5.6267E+00  | 2.0267E-02  | 4.3457E-11  | 5.1834E-01  | 2.1882E-01  | 2.3163E-02  | 2.9263E-02  |
| Average | 2.9262E-05          | 1.2733E+00  | 1.7762E-14  | 5.8169E-20  | 1.6329E+00  | 2.9035E+00  | 1.0206E-02  | 2.5447E-11  | 1.9305E-01  | 1.3370E-01  | 1.1534E-02  | 1.1291E-02  |
| Best    | 1.1309E-07          | 8.3499E-04  | 5.9790E-17  | 2.0418E-21  | 7.5827E-02  | 2.6276E-01  | 2.7411E-06  | 1.1688E-11  | 5.1467E-11  | 6.6012E-02  | 1.4821E-03  | 8.9676E-05  |
| STD     | 3.5700E-05          | 1.4307E+00  | 2.8777E-14  | 1.2439E-19  | 1.7959E+00  | 1.9525E+00  | 9.9777E-03  | 1.3247E-11  | 2.1431E-01  | 6.0210E-02  | 9.0233E-03  | 1.2002E-02  |
| F13     |                     |             |             |             |             |             |             |             |             |             |             |             |
| Worst   | 2.7104E-04          | 5.5560E-02  | 4.3949E-02  | 1.0987E-02  | 1.5863E+00  | 1.0991E-02  | 1.9995E-01  | 9.4975E-11  | 1.0987E-02  | 4.7545E-01  | 1.5739E-01  | 5.1401E-01  |
| Average | 9.5026E-05          | 2.2263E-02  | 8.7898E-03  | 2.1975E-03  | 9.3911E-01  | 4.3965E-03  | 4.0000E-02  | 5.6741E-11  | 2.1975E-03  | 3.9263E-01  | 7.2692E-02  | 1.1294E-01  |
| Best    | 2.7176E-06          | 8.2498E-04  | 4.0278E-16  | 8.6127E-22  | 2.8877E-01  | 2.2534E-07  | 6.5501E-06  | 3.5877E-11  | 5.7806E-10  | 3.3532E-01  | 2.4993E-03  | 6.6998E-03  |
| STD     | 1.0312E-04          | 2.2905E-02  | 1.9655E-02  | 4.9137E-03  | 4.6888E-01  | 6.0192E-03  | 8.9412E-03  | 2.3790E-11  | 4.9137E-03  | 5.0910E-02  | 6.4705E-02  | 1.8368E-01  |
| (W/L/T) | (6/5/2)             | (0/13/0)    | (0/12/1)    | (2/10/0)    | (0/13/0)    | (0/13/0)    | (0/13/0)    | (1/12/0)    | (0/13/0)    | (1/12/0)    | (0/13/0)    | (1/10/2)    |
| Mean    | 2.0000E+00          | 8.8667E+00  | 4.1333E+00  | 5.9333E+00  | 9.8667E+00  | 8.4667E+00  | 5.0000E+00  | 4.8667E+00  | 8.8000E+00  | 7.3333E+00  | 6.2000E+00  | 4.7333E+00  |
| Ranking | 1                   | 11          | 2           | 6           | 12          | 9           | 5           | 4           | 10          | 8           | 7           | 3           |

Table 9: Results of the comparative methods on classical test functions (F14-F23)

| Fun No. | Comparative methods |             |             |             |             |             |             |             |             |             |             |             |
|---------|---------------------|-------------|-------------|-------------|-------------|-------------|-------------|-------------|-------------|-------------|-------------|-------------|
| Measure | AO                  | GOA         | EO          | PSO         | DA          | ALO         | GWO         | MPA         | SSA         | SCA         | WOA         | SMA         |
| F14     |                     |             |             |             |             |             |             |             |             |             |             |             |
| Worst   | 2.9821E+00          | 1.4600E+01  | 9.9800E-01  | 3.9700E+00  | 1.9900E+00  | 5.9300E+00  | 1.0800E+01  | 9.9800E-01  | 2.9800E+00  | 2.9800E+00  | 1.0800E+01  | 4.6705E+00  |
| Average | 2.3207E+00          | 1.2300E+01  | 9.9800E-01  | 2.7800E+00  | 1.4000E+00  | 3.5700E+00  | 6.2900E+00  | 9.9800E-01  | 1.5900E+00  | 1.4900E+00  | 4.1400E+00  | 2.4741E+00  |
| Best    | 9.9800E-01          | 9.8000E+00  | 9.9800E-01  | 1.9900E+00  | 9.9800E-01  | 9.9800E-01  | 2.9800E+00  | 9.9800E-01  | 9.9800E-01  | 9.9800E-01  | 9.9800E-01  | 9.9800E-01  |
| STD     | 1.0246E+00          | 1.8600E+00  | 1.5700E-16  | 1.0800E+00  | 5.4400E-01  | 2.2700E+00  | 4.1000E+00  | 0.0000E+00  | 8.8800E-01  | 8.5900E-01  | 4.2300E+00  | 4.6712E+00  |
| F15     |                     |             |             |             |             |             |             |             |             |             |             |             |
| Worst   | 8.4575E-04          | 2.1800E-02  | 3.5300E-04  | 9.9300E-04  | 2.0400E-02  | 2.0400E-02  | 2.0400E-02  | 3.0700E-04  | 2.0800E-02  | 1.9100E-03  | 1.5200E-03  | 1.4362E-03  |
| Average | 5.5089E-04          | 9.7900E-03  | 3.2100E-04  | 9.2000E-04  | 5.7200E-03  | 4.9500E-03  | 8.4500E-03  | 3.0700E-04  | 4.8000E-03  | 1.2800E-03  | 7.7400E-04  | 8.3936E-04  |
| Best    | 4.0581E-04          | 7.8500E-04  | 3.0800E-04  | 8.6600E-04  | 1.5000E-03  | 7.7800E-04  | 3.0800E-04  | 3.0700E-04  | 7.4300E-04  | 6.9200E-04  | 3.1300E-04  | 5.1901E-04  |
| STD     | 1.9027E-04          | 1.0500E-02  | 1.9800E-05  | 6.6400E-05  | 8.1900E-03  | 8.6500E-03  | 1.0900E-02  | 2.9000E-15  | 8.9500E-03  | 4.9000E-04  | 4.5600E-04  | 3.6588E-04  |
| F16     |                     |             |             |             |             |             |             |             |             |             |             |             |
| Worst   | -1.0316E+00         | -1.0300E+00 | -1.0290E+00 |
| Average | -1.0316E+00         | -1.0300E+00 | -1.0306E+00 |
| Best    | -1.0316E+00         | -1.0300E+00 | -1.0313E+00 |
| STD     | 6.5206E-08          | 2.1400E-13  | 1.9200E-16  | 1.9200E-16  | 4.2300E-07  | 2.9300E-13  | 2.8000E-08  | 0.0000E+00  | 1.5200E-14  | 2.1700E-05  | 1.1800E-09  | 8.5115E-04  |
| F17     |                     |             |             |             |             |             |             |             |             |             |             |             |
| Worst   | 3.9789E-01          | 0.0000E+00  | 3.9800E-01  | 3.9800E-01  | 3.9800E-01  | 3.9800E-01  | 3.9800E-01  | 3.9800E-01  | 0.0000E+00  | 4.0200E-01  | 3.9800E-01  | 3.9933E-01  |
| Average | 3.9789E-01          | 0.0000E+00  | 3.9800E-01  | 3.9800E-01  | 3.9800E-01  | 3.9800E-01  | 3.9800E-01  | 3.9800E-01  | 0.0000E+00  | 4.0000E-01  | 3.9800E-01  | 3.9829E-01  |
| Best    | 3.9789E-01          | 0.0000E+00  | 3.9800E-01  | 3.9800E-01  | 3.9800E-01  | 3.9800E-01  | 3.9800E-01  | 3.9800E-01  | 0.0000E+00  | 3.9900E-01  | 3.9800E-01  | 3.9798E-01  |
| STD     | 4.7081E-07          | 0.0000E+00  | 0.0000E+00  | 0.0000E+00  | 1.1900E-06  | 1.8000E-13  | 1.0500E-05  | 4.3700E-14  | 0.0000E+00  | 1.3700E-03  | 1.9800E-04  | 5.2390E-04  |
| F18     |                     |             |             |             |             |             |             |             |             |             |             |             |
| Worst   | 3.0000E+00          | 3.0000E+00  | 3.0000E+00  | 3.0000E+00  | 3.0000E+00  | 3.0000E+00  | 8.4000E+01  | 3.0000E+00  | 3.0000E+00  | 3.0000E+00  | 3.0000E+00  | 3.0000E+00  |
| Average | 3.0000E+00          | 3.0000E+00  | 3.0000E+00  | 3.0000E+00  | 3.0000E+00  | 3.0000E+00  | 1.9200E+01  | 3.0000E+00  | 3.0000E+00  | 3.0000E+00  | 3.0000E+00  | 3.0000E+00  |
| Best    | 3.0000E+00          | 3.0000E+00  | 3.0000E+00  | 3.0000E+00  | 3.0000E+00  | 3.0000E+00  | 3.0000E+00  | 3.0000E+00  | 3.0000E+00  | 3.0000E+00  | 3.0000E+00  | 3.0000E+00  |
| STD     | 3.0000E+00          | 1.7500E-12  | 1.1300E-15  | 1.2600E-15  | 4.6300E-13  | 1.5400E-12  | 3.6200E+01  | 1.1300E-15  | 5.9500E-13  | 1.1300E-03  | 1.5500E-04  | 4.6300E-13  |
| F19     |                     |             |             |             |             |             |             |             |             |             |             |             |
| Worst   | -3.8607E+00         | -3.0800E+00 | -3.8600E+00 | -3.8500E+00 | -3.8500E+00 | -3.8336E+00 |
| Average | -3.8624E+00         | -3.5400E+00 | -3.8600E+00 | -3.8500E+00 | -3.8500E+00 | -3.8499E+00 |
| Best    | -3.8628E+00         | -3.8600E+00 | -3.8500E+00 | -3.8600E+00 | -3.8601E+00 |
| STD     | 8.4657E-04          | 3.2900E-01  | 6.2800E-16  | 3.1400E-16  | 1.4800E-03  | 4.6500E-11  | 1.8200E-03  | 3.1400E-16  | 2.8100E-10  | 1.3200E-03  | 4.4600E-03  | 1.0229E-02  |
| F20     |                     |             |             |             |             |             |             |             |             |             |             |             |
| Worst   | -3.1994E+00         | -3.2000E+00 | -3.2000E+00 | -3.2000E+00 | -3.1800E+00 | -3.1900E+00 | -3.0800E+00 | -3.2000E+00 | -3.1600E+00 | -2.6000E+00 | -3.0900E+00 | -2.8432E+00 |
| Average | -3.3014E+00         | -3.3000E+00 | -3.3000E+00 | -3.2500E+00 | -3.2100E+00 | -3.2700E+00 | -3.2000E+00 | -3.3000E+00 | -3.2400E+00 | -2.9300E+00 | -3.2600E+00 | -3.3011E+00 |
| Best    | -3.3220E+00         | -3.3200E+00 | -3.0700E+00 | -3.3200E+00 | -3.2223E+00 |
| STD     | 4.9969E-02          | 5.5600E-02  | 5.3200E-02  | 6.5100E-02  | 6.0500E-02  | 6.9000E-02  | 8.5900E-02  | 5.3200E-02  | 7.7000E-02  | 1.8900E-01  | 9.9200E-02  | 1.3453E-01  |
| F21     |                     |             |             |             |             |             |             |             |             |             |             |             |
| Worst   | -1.0140E+01         | -2.6800E+00 | -2.9400E-01 | -2.6300E+00 | -2.6300E+00 | -2.6800E+00 | -1.0100E+01 | -1.0002E+01 | -5.0600E+00 | -4.9600E-01 | -5.0500E+00 | -5.0240E+00 |
| Average | -1.0149E+01         | -6.1500E+00 | -4.6600E-01 | -7.1500E+00 | -6.6300E+00 | -4.6100E+00 | -1.0100E+01 | -1.0013E+01 | -6.0800E+00 | -8.9400E-01 | -8.0700E+00 | -7.5258E+00 |
| Best    | -1.0153E+01         | -1.0200E+01 | -7.1100E-01 | -1.0200E+01 | -1.0200E+01 | -5.1000E+00 | -1.0200E+01 | -1.0200E+01 | -1.0200E+01 | -2.1000E+00 | -1.0100E+01 | -1.0152E+01 |
| STD     | 4.9281E-03          | 3.7800E+00  | 1.5900E-01  | 4.1100E+00  | 3.3700E+00  | 1.0800E+00  | 2.9900E-03  | 1.7800E-11  | 2.2700E+00  | 6.9300E-01  | 2.7500E+00  | 2.7307E+00  |
| F22     |                     |             |             |             |             |             |             |             |             |             |             |             |
| Worst   | -1.0395E+01         | -2.7500E+00 | -5.0900E+00 | -2.7500E+00 | -2.7500E+00 | -3.7200E+00 | -1.0400E+01 | -1.0400E+01 | -3.7200E+00 | -9.0600E-01 | -2.9400E-01 | -5.0840E+00 |
| Average | -1.0401E+01         | -7.3400E+00 | -9.3400E+00 | -6.4700E+00 | -6.3800E+00 | -7.7300E+00 | -1.0400E+01 | -1.0400E+01 | -8.0100E+00 | -1.9000E+00 | -5.5600E-01 | -1.0304E+01 |
| Best    | -1.0403E+01         | -1.0400E+01 | -1.0400E+01 | -1.0400E+01 | -1.0300E+01 | -1.0400E+01 | -1.0400E+01 | -1.0400E+01 | -1.0400E+01 | -4.0200E+00 | -8.5800E-01 | -1.0401E+01 |
| STD     | 2.9768E-03          | 4.1900E+00  | 2.3800E+00  | 3.6800E+00  | 3.5400E+00  | 3.6600E+00  | 1.3400E-03  | 1.0400E-11  | 3.3100E+00  | 1.4300E+00  | 2.7200E-01  | 2.7263E+00  |
| F23     |                     |             |             |             |             |             |             |             |             |             |             |             |
| Worst   | -1.0535E+01         | -1.6800E+00 | -3.8400E+00 | -1.0500E+01 | -1.6800E+00 | -3.8400E+00 | -1.0500E+01 | -7.8900E-01 | -1.0500E+01 | -2.4600E+00 | -5.1000E+00 | -5.1209E+00 |
| Average | -1.0536E+01         | -4.2600E+00 | -9.2000E+00 | -1.0500E+01 | -6.5200E+00 | -9.2000E+00 | -1.0500E+01 | -2.0900E+00 | -1.0500E+01 | -4.1400E+00 | -9.4200E+00 | -7.6143E+00 |
| Best    | -1.0536E+01         | -1.0500E+01 | -1.0500E+01 | -1.0500E+01 | -1.0500E+01 | -1.0500E+01 | -1.0500E+01 | -5.1300E+00 | -1.0500E+01 | -7.2700E+00 | -1.0500E+01 | -1.0485E+01 |
| STD     | 2.7562E-04          | 3.6000E+00  | 3.0000E+00  | 1.5400E-15  | 3.7400E+00  | 3.0000E+00  | 1.9800E-03  | 1.9000E+00  | 2.1000E-11  | 1.9000E+00  | 2.4200E+00  | 2.7558E+00  |
| (W L/T) | (6 6 1)             | (1 11 1)    | (0 11 2)    | (0 12 1)    | (0 12 1)    | (0 12 1)    | (0 12 1)    | (2 9 2)     | (1 11 1)    | (0 12 1)    | (0 12 1)    | (0 12 1)    |
| Mean    | 2.0000E+00          | 7.0000E+00  | 3.9000E+00  | 4.9000E+00  | 5.9000E+00  | 5.7000E+00  | 6.1000E+00  | 3.0000E+00  | 4.6000E+00  | 8.1000E+00  | 5.9000E+00  | 5.6000E+00  |
| Ranking | 1                   | 11          | 3           | 5           | 8           | 7           | 10          | 2           | 4           | 12          | 8           | 6           |

#### 4.1.5. Acceleration convergence analysis of AO

The convergence of the AO for the optimal solutions across the iteration numbers is an essential factor that should be investigated, therefore Figure 9 depicts the best solutions attained so far across the iterations number. The acceleration convergence curves of the proposed AO show a detectable decaying rate in the cases of the unimodal functions (F1-F7). Meanwhile, other algorithms suffer from an intense stagnation to the local solutions that confirm the AO's exploitation stage is high capacity with a reliable exploration. The AO's convergence curves of the multimodal functions show the smooth transition between its exploration and exploitation phases. It convergences for optimal solutions with an observable speed compared with the other peers in F10, F11, F12, F13, F14, F16, F17. F21, F22, and F23. For these functions, it can be seen that the AO has a high balance between exploration and exploitation stages as it catches the nearest values for the optimal solutions with the fastest response in comparison with the other peers then these solutions have been exploited efficiently across the number of iterations to provide the optimal solutions. For F18, F19, and F20, the AO gradually recognizes the optimal solutions and updates the solutions across the iteration numbers that confirm the preceding observation.

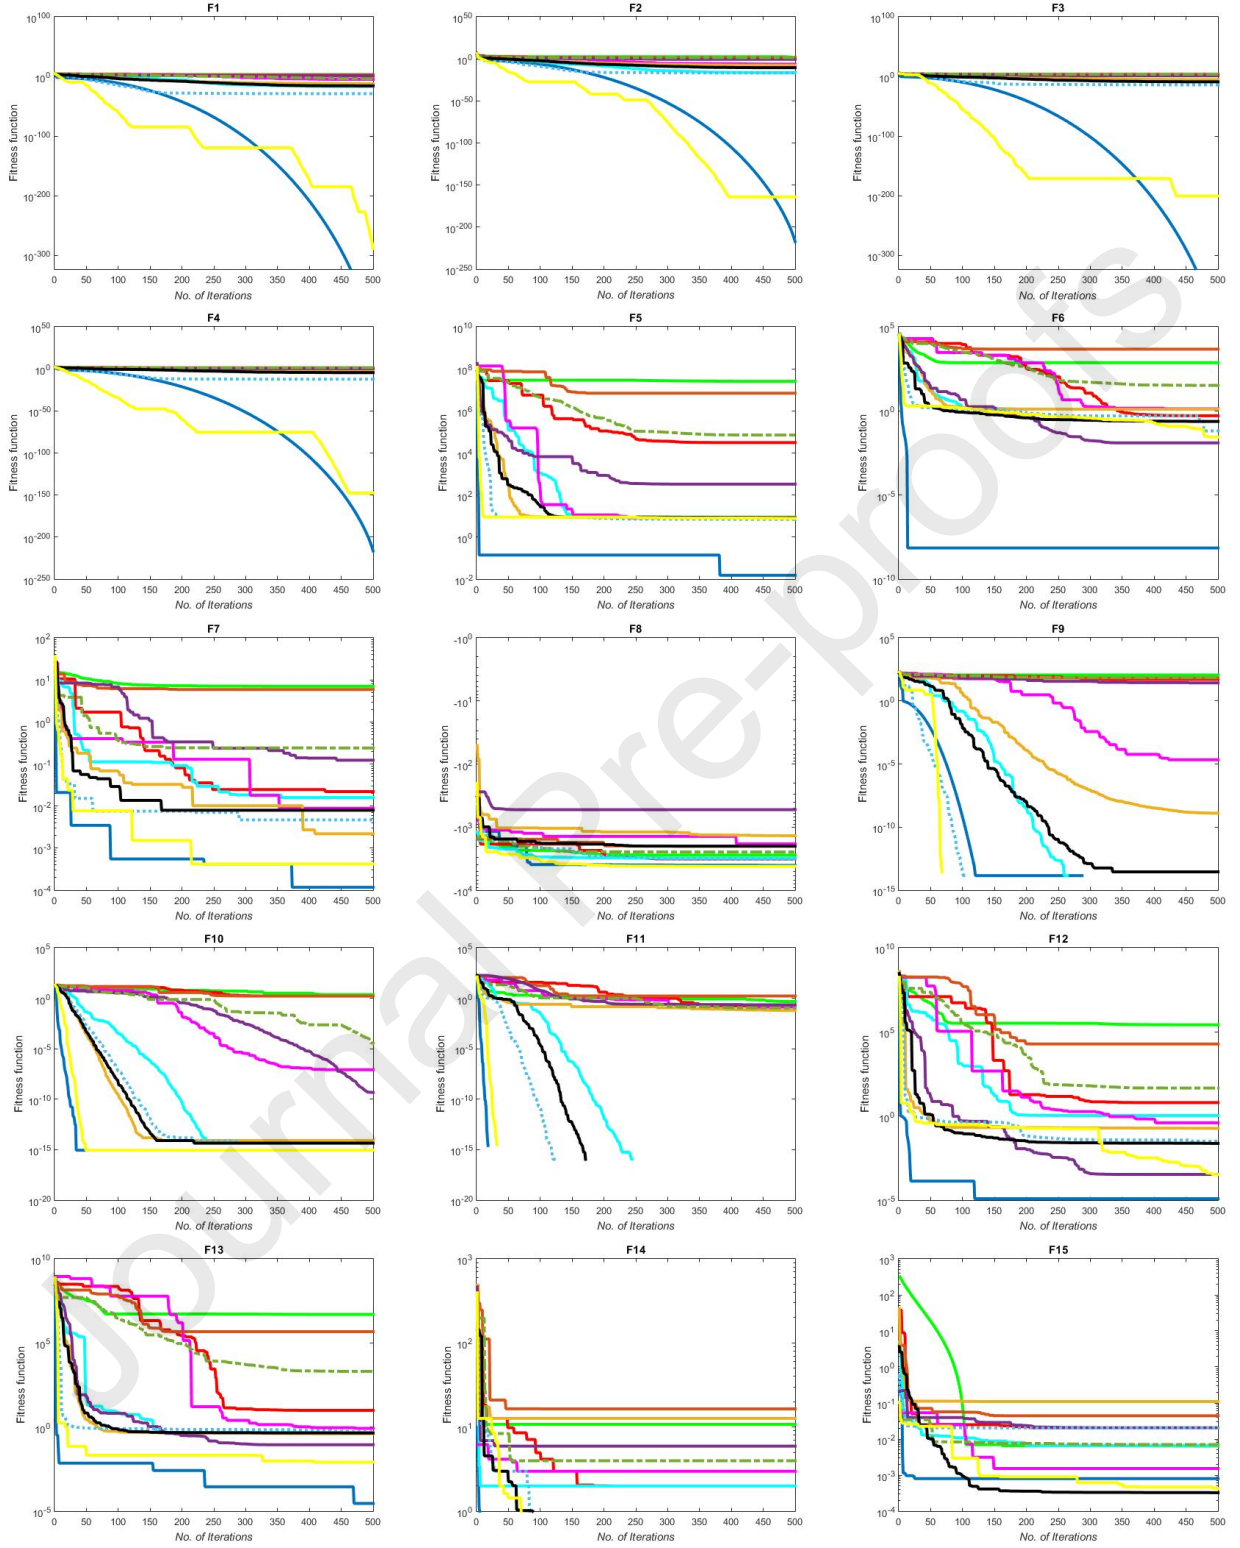



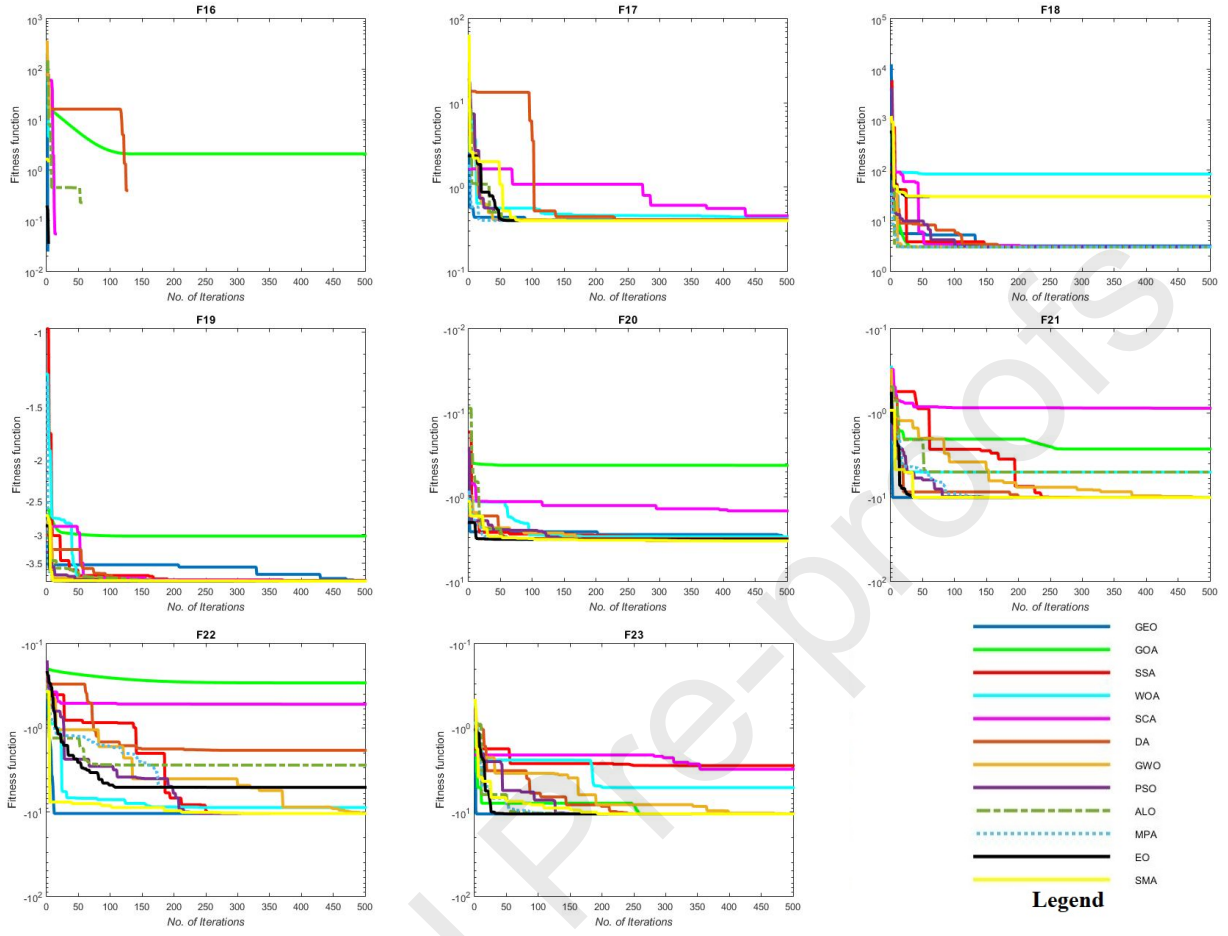

Figure 9: Convergence behavior of the comparative algorithms on classical test functions (F1-F23).

#### 4.1.6. Stability analysis of AO

To evaluate the stability and quality of the proposed AO's performance while dealing with high dimensional optimization problems, thirteen functions of Tables 2-3 have been employed with three dimensions levels of 50, 100, and 500. The AO and the other counterparts (GOA, EO, PSO, DA, ALO, GWO, MPA, SSA, SCA, WOA, and SMA) have been implemented for 30 independent runs with 500 iteration and 50 search agents. The worst, average, best, and STD values of the considered benchmarks' test-bed by the executed algorithms have been computed as in Tables 10-11 and 12 for the three studied dimensions of 50, 100, and 500, respectively. Furthermore, the number of the functions in which the algorithm can be classified as winning | tie | loss (W | L | T), as well as the total rank values of the algorithms, have been reported in the last lines of the Tables 10-11 and 12 to have a detailed statistical analysis. The obtained results confirm that the AO shows its reliability, stability, and robustness by increasing the optimized functions' dimension where it has the best performance for seven 50 dimensional functions.

Moreover, it is the best for nine functions for the cases of 100 and 500-dimensional test functions. This observation approves the AO's efficient exploration and exploitation capabilities in discovering the search domain while dealing with the many local optima of high dimensional multimodal functions and exploit the optimal solutions accurately. For the other counterparts, the SMA occupied the second rank after AO with success performance for only one function in 100 and 500-dimensional benchmarks. In contrast, the GOA, EO, PSO, DA, ALO, GWO, MPA, SSA, and SCA failed to show the best performance for these high dimensional functions. Sequentially, the AO outperforms the other counterparts and occupies the first rank for the three cases of high dimensional functions.

#### 4.2. Results comparisons using CEC2017 test functions

To further investigate the quality of the proposed AO and examine its capabilities of the exploration, exploitation, and local optimum avoidance, one of the most challenging benchmarks has been employed is the CEC2017 suite. Four classes have been covered in the twenty-nigh CEC2017 functions that are unimodal(F1-F3), multimodal (F4-F11), hybrid (F12-F20), and finally, composition functions (F21-F30). The specifications of the CEC2017 has been reported in Table 13. We examined the AO with these benchmarks and compared it with well-regarded algorithms such as GA, PSO, CS, GWO, SSA, EO, GSA, and Covariance Matrix Adaptation Evolution Strategy (CMA-ES). All the algorithms have been executed for 30 independent runs with 500 iterations and 50 search agents. The average and STD values of the studied benchmarks set, moreover, the number of functions in which the algorithms can be accounted as the best | indistinguishable | inferior to the others, and the Friedman mean rank value, as well as the final ranks of the algorithms, are listed in Table 14.

The results divulge that the AO has a comparable performance concerning the SI techniques (PSO, CS, GWO, SSA, and EO), the EA algorithms (GA, CMA-ES), as well as the PhA one (GSA). The AO reaches for the optimal solutions of F9. It shows the nearest average values for the optimal solutions for other eight functions ( F5, F14, F16, F20, F21, F24, F25, F30) meanwhile the GA, PSO, CS, GWO, EO, and GSA failed to classified as the best algorithms for any function. The CMA-ES is considered the stronger competitor for AO with achieving the best response for eight functions. Most of the functions in which the AO has the best response from the hybrid and composition functions affirm the high quality of the exploration and exploitation phases of the AO and its ability to deal with the high local optimal of the composition functions. The AO has no significant difference from the other algorithms in 13 functions and has a minimum Friedman mean rank across the studied test-bed suit course. Therefore it has the first rank as a final score over these studied functions. The best convergence curves of the implemented algorithms have been depicted in Figure

Table 10: Results of the comparative methods on classical test functions (F1-F13), the dimension is fixed to 50.

| Fun No. | Comparative methods |             |             |             |             |             |             |             |             |             |             |             |
|---------|---------------------|-------------|-------------|-------------|-------------|-------------|-------------|-------------|-------------|-------------|-------------|-------------|
| Measure | AO                  | GOA         | EO          | PSO         | DA          | ALO         | GWO         | MPA         | SSA         | SCA         | WOA         | SMA         |
| F1      |                     |             |             |             |             |             |             |             |             |             |             |             |
| Worst   | 0.0000E+00          | 7.8000E+03  | 4.0700E-21  | 6.9700E+00  | 3.6400E+03  | 1.1100E+04  | 3.7000E-11  | 1.5500E-21  | 1.0200E+03  | 7.0200E+03  | 5.5800E-42  | 1.9744E-220 |
| Average | 0.0000E+00          | 6.7200E+03  | 1.0800E-21  | 3.9900E+00  | 3.0200E+03  | 6.7300E+03  | 1.2100E-11  | 4.2500E-22  | 6.1400E+02  | 3.2800E+03  | 1.4000E-42  | 2.8206E-221 |
| Best    | 0.0000E+00          | 4.7800E+03  | 3.2000E-23  | 2.3600E+00  | 2.4800E+03  | 3.7400E+03  | 3.0100E-12  | 3.6600E-24  | 2.8000E+02  | 5.7400E+02  | 4.5600E-58  | 0.0000E+00  |
| STD     | 0.0000E+00          | 1.3600E+03  | 1.9900E-21  | 2.0300E+00  | 5.5200E+02  | 3.1100E+03  | 1.6600E-11  | 7.4800E-22  | 3.0500E+02  | 2.7000E+03  | 2.7900E-42  | 0.0000E+00  |
| F2      |                     |             |             |             |             |             |             |             |             |             |             |             |
| Worst   | 3.3730E-216         | 4.1325E+24  | 1.2911E-11  | 1.0885E+02  | 1.2331E+02  | 3.8276E+02  | 7.1711E-05  | 7.9169E-12  | 1.7569E+06  | 1.5811E+01  | 9.3673E-36  | 3.4565E-107 |
| Average | 1.2823E-216         | 1.0331E+24  | 9.3615E-12  | 9.3889E+01  | 7.9961E+01  | 2.1559E+02  | 6.7175E-05  | 3.4440E-12  | 4.4487E+05  | 7.9742E+00  | 3.6638E-36  | 4.9380E-108 |
| Best    | 4.2658E-220         | 5.7983E+02  | 5.3561E-12  | 7.5642E+01  | 5.4524E+01  | 1.4414E+02  | 6.3534E-05  | 5.3007E-13  | 2.3050E+02  | 1.4311E+00  | 2.9744E-43  | 1.0290E-239 |
| STD     | 0.0000E+00          | 2.0662E+24  | 3.3725E-12  | 1.3906E+01  | 3.0258E+01  | 1.1203E+02  | 3.5184E-06  | 3.5477E-12  | 8.7472E+05  | 7.0079E+00  | 4.0658E-36  | 1.3064E-107 |
| F3      |                     |             |             |             |             |             |             |             |             |             |             |             |
| Worst   | 0.0000E+00          | 8.1600E+04  | 2.1600E+02  | 1.6500E+04  | 1.6400E+05  | 1.6700E+05  | 3.3700E+03  | 1.2200E+01  | 6.1400E+04  | 1.5200E+05  | 5.5300E+05  | 6.7725E-202 |
| Average | 0.0000E+00          | 7.1900E+04  | 6.0200E+01  | 1.3900E+04  | 1.2800E+05  | 1.2000E+05  | 1.6200E+03  | 3.2800E+00  | 5.6400E+00  | 8.9000E+04  | 3.8900E+05  | 9.6750E-203 |
| Best    | 0.0000E+00          | 5.7400E+04  | 1.8300E+00  | 9.0400E+03  | 8.9100E+04  | 8.7600E+04  | 2.7700E+02  | 8.4100E-02  | 5.2100E+04  | 3.3500E+04  | 3.1100E+05  | 0.0000E+00  |
| STD     | 0.0000E+00          | 1.0300E+04  | 1.0400E+02  | 3.4400E+03  | 3.8900E+04  | 3.7200E+04  | 1.5800E+03  | 5.9400E+00  | 4.6600E+03  | 5.6500E+04  | 1.1100E+05  | 0.0000E+00  |
| F4      |                     |             |             |             |             |             |             |             |             |             |             |             |
| Worst   | 3.8171E-217         | 7.0400E+08  | 6.8700E+08  | 7.5600E+08  | 6.8000E+08  | 8.8900E+08  | 8.5300E+08  | 5.9300E+08  | 8.0000E+08  | 7.3000E+08  | 7.9800E+08  | 2.1946E-103 |
| Average | 1.1726E-217         | 6.5100E+08  | 6.1800E+08  | 6.5100E+08  | 5.5900E+08  | 7.6100E+08  | 6.4500E+08  | 5.3700E+08  | 6.7700E+08  | 6.3100E+08  | 6.9800E+08  | 3.1352E-104 |
| Best    | 1.7827E-220         | 5.5800E+08  | 4.4000E+08  | 5.5300E+08  | 4.4700E+08  | 6.7300E+08  | 4.8300E+08  | 4.9100E+08  | 4.5800E+08  | 4.5000E+08  | 6.4900E+08  | 2.6621E-187 |
| STD     | 0.0000E+00          | 6.4000E+07  | 1.1900E+08  | 8.3200E+07  | 9.5400E+07  | 9.2300E+07  | 1.5600E+08  | 4.2300E+07  | 1.5100E+08  | 1.2400E+08  | 6.7800E+07  | 8.2950E-104 |
| F5      |                     |             |             |             |             |             |             |             |             |             |             |             |
| Worst   | 1.6754E-02          | 7.2100E+07  | 4.8600E+01  | 1.4500E+05  | 9.1000E+07  | 2.5400E+07  | 4.8800E+01  | 4.8700E+01  | 3.2100E+07  | 5.6800E+07  | 4.8800E+01  | 4.8890E+01  |
| Average | 7.2723E-03          | 5.0400E+07  | 4.7900E+01  | 6.0800E+04  | 4.2900E+07  | 1.6500E+07  | 4.8700E+01  | 4.8700E+01  | 2.4000E+07  | 2.5200E+07  | 4.8800E+01  | 3.3403E+01  |
| Best    | 3.5200E-05          | 3.8000E+07  | 4.7200E+01  | 1.6800E+04  | 7.7700E+06  | 5.5200E+06  | 4.8600E+01  | 4.8500E+01  | 1.7800E+07  | 1.9700E+06  | 4.8800E+01  | 6.3248E+00  |
| STD     | 7.1591E-04          | 1.5000E+07  | 7.6000E-01  | 6.0300E+04  | 3.7000E+07  | 8.2200E+06  | 1.0600E-01  | 1.0900E-01  | 6.5700E+06  | 2.7600E+07  | 2.8700E-02  | 1.1283E+01  |
| F6      |                     |             |             |             |             |             |             |             |             |             |             |             |
| Worst   | 3.9756E-03          | 2.8600E+04  | 6.7700E+00  | 8.9100E+01  | 3.5200E+04  | 2.9000E+04  | 7.9100E+00  | 5.2600E+00  | 1.6600E+04  | 8.9800E+03  | 8.3900E+00  | 4.4631E+00  |
| Average | 1.0981E-03          | 2.0300E+04  | 6.3700E+00  | 6.9000E+01  | 2.3700E+04  | 2.4100E+04  | 7.1100E+00  | 4.3300E+00  | 1.0700E+04  | 4.0200E+03  | 6.5500E+00  | 3.0079E+00  |
| Best    | 9.1128E-07          | 1.4200E+04  | 5.6700E+00  | 4.9100E+01  | 1.3600E+04  | 2.1700E+04  | 6.2300E+00  | 3.6900E+00  | 5.7800E+03  | 4.0400E+02  | 5.4400E+00  | 2.3585E-01  |
| STD     | 1.6565E-03          | 6.0600E+03  | 4.7900E-01  | 1.7900E+01  | 9.3400E+03  | 3.3400E+03  | 6.9100E-01  | 7.1400E-01  | 4.4800E+03  | 3.7600E+03  | 1.3500E+00  | 1.6904E+00  |
| F7      |                     |             |             |             |             |             |             |             |             |             |             |             |
| Worst   | 1.2267E-03          | 4.0400E+02  | 1.7000E-02  | 3.2000E+02  | 3.0500E+01  | 3.1500E+01  | 5.0400E-02  | 8.1400E-03  | 1.2200E+01  | 2.0200E+01  | 3.0800E-02  | 3.0226E-03  |
| Average | 5.3134E-04          | 3.0000E+02  | 6.7800E-03  | 2.0100E+02  | 1.5200E+01  | 1.8800E+01  | 2.6900E-02  | 4.8000E-03  | 1.0500E+01  | 1.5200E+01  | 1.6200E-02  | 1.0741E-03  |
| Best    | 1.5038E-05          | 2.4800E+02  | 1.0800E-03  | 1.2200E-02  | 1.9000E+00  | 9.0300E+00  | 1.2100E-02  | 2.4700E-03  | 8.5100E+00  | 4.5600E+00  | 7.2900E-03  | 1.4281E-04  |
| STD     | 5.1254E-04          | 7.0200E+01  | 7.1200E-03  | 9.0000E+01  | 1.1800E+01  | 1.2300E+01  | 1.7400E-02  | 2.4900E-03  | 1.6900E+00  | 7.2200E+00  | 1.0900E-02  | 1.1286E-03  |
| F8      |                     |             |             |             |             |             |             |             |             |             |             |             |
| Worst   | -6.9100E+03         | -8.2500E+03 | -7.9100E+03 | -2.8200E+03 | -4.2000E+03 | -9.0300E+03 | -6.8400E+03 | -1.0400E+04 | -8.6400E+03 | -3.6700E+03 | -8.6000E+03 | -2.0822E+04 |
| Average | -1.0100E+04         | -9.3000E+03 | -1.0700E+04 | -3.9000E+03 | -5.6700E+03 | -9.0300E+03 | -7.7000E+03 | -1.1400E+04 | -9.0800E+03 | -4.0200E+03 | -1.2400E+04 | -2.0887E+04 |
| Best    | -1.2800E+04         | -9.8500E+03 | -1.2800E+04 | -5.2700E+03 | -6.6100E+03 | -9.0300E+03 | -8.8800E+03 | -1.2600E+04 | -9.6100E+03 | -4.2500E+03 | -1.5000E+04 | -2.0947E+04 |
| STD     | 2.0800E+03          | 2.0800E+02  | 2.0800E+03  | 1.0200E+03  | 1.1200E+03  | 0.0000E+00  | 9.6400E+02  | 9.6400E+02  | 4.3000E+02  | 2.4800E+02  | 2.9900E+03  | 5.2103E+01  |
| F9      |                     |             |             |             |             |             |             |             |             |             |             |             |
| Worst   | 0.0000E+00          | 6.9200E+02  | 9.9800E-01  | 4.7400E+02  | 5.3200E+02  | 4.3700E+02  | 3.0600E+01  | 0.0000E+00  | 4.3600E+02  | 3.5600E+02  | 0.0000E+00  | 0.0000E+00  |
| Average | 0.0000E+00          | 6.0200E+02  | 4.9900E-01  | 3.5900E+02  | 4.5100E+02  | 3.8000E+02  | 2.0800E+01  | 0.0000E+00  | 3.8300E+02  | 2.0300E+02  | 0.0000E+00  | 0.0000E+00  |
| Best    | 0.0000E+00          | 5.2200E+02  | 1.1400E-13  | 3.0200E+02  | 3.0900E+02  | 2.9500E+02  | 8.9400E+00  | 0.0000E+00  | 3.1100E+02  | 1.0700E+02  | 0.0000E+00  | 0.0000E+00  |
| STD     | 0.0000E+00          | 7.0000E+01  | 5.7600E-01  | 8.0700E+01  | 9.8900E+01  | 6.7400E+01  | 1.0800E+01  | 0.0000E+00  | 5.8400E+01  | 1.1000E+02  | 0.0000E+00  | 0.0000E+00  |
| F10     |                     |             |             |             |             |             |             |             |             |             |             |             |
| Worst   | 8.8818E-16          | 2.0600E+01  | 3.5200E-08  | 6.3800E+00  | 1.8900E+01  | 1.7900E+01  | 2.1800E-04  | 2.3100E-12  | 1.9000E+01  | 2.0600E+01  | 1.4700E-13  | 8.8818E-16  |
| Average | 8.8818E-16          | 2.0000E+01  | 1.7600E-08  | 4.9700E+00  | 1.5500E+01  | 1.2700E+01  | 1.4400E-04  | 1.6000E-12  | 1.8300E+01  | 1.9500E+01  | 5.0600E-14  | 8.8818E-16  |
| Best    | 8.8818E-16          | 1.9300E+01  | 8.2300E-09  | 4.3700E+00  | 1.2700E+01  | 1.7300E+00  | 9.6100E-05  | 2.9200E-13  | 1.7200E+01  | 1.6200E+01  | 4.4400E-15  | 8.8818E-16  |
| STD     | 0.0000E+00          | 5.4300E-01  | 1.2000E-08  | 9.4200E-01  | 2.5600E+00  | 7.4200E+00  | 5.2200E-05  | 8.9500E-13  | 7.7600E-01  | 2.1900E+00  | 6.5800E-14  | 0.0000E+00  |
| F11     |                     |             |             |             |             |             |             |             |             |             |             |             |
| Worst   | 0.0000E+00          | 2.1700E+02  | 7.9900E-15  | 1.3300E+02  | 1.2800E+02  | 2.5700E+02  | 7.6800E-02  | 1.0500E-02  | 1.6300E+02  | 2.2100E+01  | 0.0000E+00  | 0.0000E+00  |
| Average | 0.0000E+00          | 1.5300E+02  | 2.4700E-15  | 1.1700E+02  | 9.0500E+01  | 2.2600E+02  | 4.7100E-02  | 2.6300E-03  | 1.0300E+02  | 1.4600E+01  | 0.0000E+00  | 0.0000E+00  |
| Best    | 0.0000E+00          | 1.1300E+02  | 0.0000E+00  | 8.9700E+01  | 4.3000E+01  | 2.0500E+02  | 5.2200E-06  | 0.0000E+00  | 7.0300E+01  | 2.5800E+00  | 0.0000E+00  | 0.0000E+00  |
| STD     | 0.0000E+00          | 4.4500E+01  | 3.7400E-15  | 1.9400E+01  | 3.7900E+01  | 2.4700E+01  | 3.3000E-02  | 5.2600E-03  | 4.1600E+01  | 8.8100E+00  | 0.0000E+00  | 0.0000E+00  |
| F12     |                     |             |             |             |             |             |             |             |             |             |             |             |
| Worst   | 3.4745E-06          | 7.2887E+07  | 3.5673E-01  | 2.2947E+01  | 7.4787E+05  | 4.7065E+07  | 7.4009E-01  | 2.0077E-01  | 1.9431E+07  | 9.2098E+07  | 7.0376E-01  | 5.7213E-01  |
| Average | 1.0767E-06          | 3.6137E+07  | 3.0089E-01  | 1.4439E+01  | 4.7637E+05  | 1.5716E+07  | 6.1270E-01  | 1.3741E-01  | 1.0097E+07  | 6.4479E+07  | 4.7881E-01  | 1.5052E-01  |
| Best    | 6.2530E-08          | 1.6941E+07  | 2.5770E-01  | 9.8132E+00  | 1.6807E+01  | 2.1230E+06  | 4.2030E-01  | 7.6591E-02  | 2.1004E+06  | 1.3318E+07  | 2.2526E-01  | 1.9706E-03  |
| STD     | 1.4585E-06          | 2.5708E+07  | 4.6545E-02  | 5.8116E+00  | 3.3844E+05  | 2.1337E+07  | 1.5289E-01  | 5.5152E-02  | 7.4632E+06  | 3.5021E+07  | 2.3845E-01  | 2.4430E-01  |
| F13     |                     |             |             |             |             |             |             |             |             |             |             |             |
| Worst   | 1.4249E-04          | 1.7700E+08  | 4.3400E+00  | 1.2400E+03  | 5.5200E+07  | 1.7800E+08  | 4.6200E+00  | 4.7000E+00  | 4.0000E+07  | 2.1200E+08  | 4.4500E+00  | 4.9432E+00  |
| Average | 6.4589E-05          | 1.2900E+08  | 4.1100E+00  | 3.3800E+02  | 1.9100E+07  | 9.6700E+07  | 4.0500E+00  | 4.2200E+00  | 2.5500E+07  | 9.3600E+07  | 3.7500E+00  | 2.0861E+00  |
| Best    | 1.2283E-05          | 7.4000E+07  | 3.8200E+00  | 3.2200E+01  | 4.1300E+06  | 2.6500E+07  | 3.5900E+00  | 3.7100E+00  | 7.5900E+06  | 1.9100E+07  | 3.2100E+00  | 4.2197E-04  |
| STD     | 6.6508E-05          | 4.4100E+07  | 2.2000E-01  | 5.9900E+02  | 2.4300E+07  | 7.7100E+07  | 4.9100E-01  | 4.0800E-01  | 1.3400E+07  | 8.2600E+07  | 5.4500E-01  | 2.5937E+00  |
| (W/L/T) | (7/3/3)             | (0/13/0)    | (0/13/0)    | (0/13/0)    | (0/13/0)    | (0/13/0)    | (0/13/0)    | (0/12/1)    | (0/12/1)    | (0/13/0)    | (0/11/2)    | (2/9/2)     |
| Mean    | 1.3077E+00          | 1.0538E+01  | 4.3846E+00  | 8.1538E+00  | 8.9231E+00  | 1.0154E+01  | 5.9231E+00  | 3.4615E+00  | 8.8462E+00  | 8.9231E+00  | 4.6154E+00  | 1.7692E+00  |
| Ranking | 1                   | 12          | 4           | 7           | 9           | 11          | 6           | 3           | 8           | 9           | 5           | 2           |

Table 11: Results of the comparative methods on classical test functions (F1-F13), the dimension is fixed to 100.

| Fun No. | Comparative methods |             |             |             |             |             |             |             |             |             |             |             |
|---------|---------------------|-------------|-------------|-------------|-------------|-------------|-------------|-------------|-------------|-------------|-------------|-------------|
| Measure | AO                  | GOA         | EO          | PSO         | DA          | ALO         | GWO         | MPA         | SSA         | SCA         | WOA         | SMA         |
| F1      |                     |             |             |             |             |             |             |             |             |             |             |             |
| Worst   | 0.0000E+00          | 3.9700E+04  | 2.3000E-17  | 1.3900E+02  | 1.7200E+04  | 5.7700E+04  | 1.0400E-06  | 2.5900E-21  | 2.0400E+04  | 1.5700E+04  | 9.7200E-41  | 2.6189E-160 |
| Average | 0.0000E+00          | 3.5100E+04  | 6.2100E-18  | 1.0300E+02  | 1.1800E+04  | 3.4800E+04  | 5.1900E-07  | 1.5600E-21  | 1.8900E+04  | 9.4400E+03  | 2.4300E-41  | 5.2392E-161 |
| Best    | 0.0000E+00          | 3.1200E+04  | 2.0900E-19  | 7.6100E+01  | 7.0700E+03  | 1.7900E+04  | 2.1300E-07  | 3.7200E-22  | 1.7500E+04  | 4.8200E+03  | 2.7400E-47  | 0.0000E+00  |
| STD     | 0.0000E+00          | 3.6500E+03  | 1.1200E-17  | 2.9100E+01  | 5.2900E+03  | 2.0100E+04  | 3.6400E-07  | 1.0300E-21  | 1.1900E+03  | 4.9700E+03  | 4.8600E-41  | 1.1711E-160 |
| F2      |                     |             |             |             |             |             |             |             |             |             |             |             |
| Worst   | 9.2889E-217         | 1.1452E+21  | 5.2919E-09  | 7.7670E+01  | 2.0112E+02  | 2.1207E+02  | 1.6321E-04  | 4.2119E-13  | 2.9650E+06  | 3.7443E+00  | 1.0113E-20  | 2.2415E-108 |
| Average | 5.0995E-217         | 2.8631E+20  | 3.3539E-09  | 6.0455E+01  | 1.4725E+02  | 2.0087E+02  | 9.6421E-05  | 1.5599E-13  | 7.4137E+05  | 2.1442E+00  | 2.5286E-21  | 4.4830E-109 |
| Best    | 2.1750E-218         | 2.2804E+07  | 1.0910E-09  | 4.1852E+01  | 7.4817E+01  | 1.8230E+02  | 4.5429E-05  | 5.0701E-14  | 1.4328E+02  | 6.7898E-01  | 6.1115E-30  | 1.1235E-256 |
| STD     | 0.0000E+00          | 5.7262E+20  | 1.8478E-09  | 1.8648E+01  | 5.8095E+01  | 1.3305E+01  | 5.3157E-05  | 1.7731E-13  | 1.4824E+06  | 1.6112E+00  | 5.0564E-21  | 1.0024E-108 |
| F3      |                     |             |             |             |             |             |             |             |             |             |             |             |
| Worst   | 0.0000E+00          | 8.7200E+04  | 5.9900E+01  | 1.5700E+04  | 1.9800E+05  | 1.7800E+05  | 6.8400E+02  | 1.8400E+00  | 6.5900E+04  | 9.5600E+04  | 4.7900E+05  | 4.9870E-188 |
| Average | 0.0000E+00          | 6.7100E+04  | 1.7900E+01  | 1.2400E+04  | 1.2800E+05  | 1.3000E+05  | 4.6100E+02  | 4.9400E-01  | 5.6000E+04  | 6.7800E+04  | 3.8200E+05  | 9.9741E-189 |
| Best    | 0.0000E+00          | 5.4200E+04  | 4.4000E-02  | 1.0700E+04  | 5.5900E+04  | 9.1100E+04  | 1.4000E+02  | 5.1200E-07  | 4.6300E+04  | 4.0300E+04  | 3.0400E+05  | 0.0000E+00  |
| STD     | 0.0000E+00          | 1.4500E+04  | 2.8500E+01  | 2.3400E+03  | 5.7900E+04  | 3.9000E+04  | 2.2900E+02  | 8.9900E-01  | 8.6300E+03  | 2.8100E+04  | 7.6700E+04  | 0.0000E+00  |
| F4      |                     |             |             |             |             |             |             |             |             |             |             |             |
| Worst   | 8.1471E-219         | 6.6000E+01  | 7.8600E-03  | 2.8400E+01  | 5.5300E+01  | 7.0900E+01  | 1.4800E+00  | 1.0900E-08  | 6.9600E+01  | 8.9700E+01  | 9.8200E+01  | 1.3547E-98  |
| Average | 2.5154E-219         | 6.2700E+01  | 4.2000E-03  | 2.4800E+01  | 4.3900E+01  | 5.5400E+01  | 1.1700E+00  | 5.9700E-09  | 6.5100E+01  | 7.9500E+01  | 8.5400E+01  | 2.7108E-99  |
| Best    | 1.2027E-221         | 5.5400E+01  | 4.2300E-04  | 2.1900E+01  | 3.2900E+01  | 3.5100E+01  | 8.8100E-01  | 2.8900E-09  | 5.2700E+01  | 6.9000E+01  | 5.4600E+01  | 2.9552E-153 |
| STD     | 0.0000E+00          | 4.9500E+00  | 3.1900E-03  | 3.2900E+00  | 9.3700E+00  | 1.4900E+00  | 3.1200E-01  | 3.7100E-09  | 8.2800E+00  | 8.6500E+00  | 2.0600E+01  | 6.0578E-99  |
| F5      |                     |             |             |             |             |             |             |             |             |             |             |             |
| Worst   | 1.0092E-01          | 1.3800E+08  | 4.8000E+01  | 3.6600E+04  | 1.6900E+07  | 3.1200E+07  | 4.8800E+01  | 4.8700E+01  | 3.3300E+07  | 3.1200E+07  | 4.8900E+01  | 9.8885E+01  |
| Average | 2.4782E-02          | 9.1100E+07  | 4.7900E+01  | 2.8000E+04  | 9.5300E+06  | 1.9400E+07  | 4.8700E+01  | 4.8400E+01  | 1.2300E+07  | 1.6600E+07  | 4.8800E+01  | 6.0627E+01  |
| Best    | 6.5611E-04          | 4.4100E+07  | 4.7500E+01  | 1.9200E+04  | 2.2100E+05  | 8.8800E+06  | 4.8600E+01  | 4.7900E+01  | 3.8100E+06  | 7.6500E+05  | 4.8700E+01  | 4.9378E-01  |
| STD     | 4.2755E-02          | 4.4500E+07  | 2.6000E-01  | 9.6200E+03  | 8.6800E+06  | 9.2700E+06  | 1.1200E-01  | 3.7400E-01  | 1.4100E+07  | 1.6700E+07  | 6.8400E-02  | 5.2351E+01  |
| F6      |                     |             |             |             |             |             |             |             |             |             |             |             |
| Worst   | 2.1929E-03          | 2.5744E+04  | 6.2188E+00  | 1.3322E+02  | 3.3508E+04  | 4.2545E+04  | 7.3563E+00  | 5.1809E+00  | 1.4103E+04  | 5.2709E+03  | 7.3056E+00  | 1.4490E+01  |
| Average | 5.4323E-04          | 1.9595E+04  | 5.9007E+00  | 6.3916E+01  | 1.6152E+04  | 2.7833E+04  | 6.9873E+00  | 4.0499E+00  | 1.0800E+04  | 3.0192E+03  | 6.9144E+00  | 1.0255E+01  |
| Best    | 1.2605E-05          | 1.2858E+04  | 5.4759E+00  | 3.0782E+01  | 5.2722E+03  | 1.9855E+04  | 5.9623E+00  | 2.7927E+00  | 7.1065E+03  | 4.9268E+02  | 6.3303E+00  | 8.7579E-01  |
| STD     | 9.2961E-04          | 5.2781E+03  | 3.5111E-01  | 4.7639E+01  | 1.3542E+04  | 1.0379E+04  | 6.8377E-01  | 1.1065E+00  | 3.3932E+03  | 1.9831E+03  | 4.1399E-01  | 5.5614E+00  |
| F7      |                     |             |             |             |             |             |             |             |             |             |             |             |
| Worst   | 1.5608E-03          | 4.8350E+02  | 9.1935E-03  | 2.6149E+02  | 4.3638E+01  | 3.0933E+01  | 2.7556E-02  | 4.5624E-03  | 1.6360E+01  | 2.2357E+01  | 1.7910E-02  | 2.6144E-03  |
| Average | 8.9547E-04          | 3.6677E+02  | 6.4348E-03  | 9.5848E+01  | 1.9206E+01  | 1.7896E+01  | 1.9682E-02  | 2.1244E-03  | 1.1079E+01  | 1.3982E+01  | 9.3010E-03  | 1.4817E-03  |
| Best    | 1.1121E-04          | 2.4063E+02  | 5.1110E-03  | 3.1747E+01  | 8.1894E+00  | 7.1799E+00  | 1.2770E-02  | 3.0150E-04  | 8.7359E+00  | 5.7753E+00  | 4.0999E-03  | 2.8307E-04  |
| STD     | 7.0387E-04          | 1.1768E+02  | 1.8724E-03  | 1.1103E+02  | 1.6431E+01  | 1.0755E+01  | 7.0929E-03  | 1.7809E-03  | 3.5159E+00  | 7.4866E+00  | 6.2593E-03  | 1.0250E-03  |
| F8      |                     |             |             |             |             |             |             |             |             |             |             |             |
| Worst   | -6.4064E+03         | -8.9826E+03 | -8.4348E+03 | -2.7692E+03 | -3.6225E+03 | -9.0295E+03 | -6.6831E+03 | -1.0349E+04 | -8.1524E+03 | -3.4601E+03 | -9.5209E+03 | -4.0264E+04 |
| Average | -9.9172E+03         | -9.8724E+03 | -1.0147E+04 | -3.9191E+03 | -5.0974E+03 | -9.0536E+03 | -7.8497E+03 | -1.1362E+04 | -8.5828E+03 | -3.8878E+03 | -1.0332E+04 | -4.1488E+04 |
| Best    | -1.2910E+04         | -1.0458E+04 | -1.0847E+04 | -5.8528E+03 | -6.3641E+03 | -9.1259E+03 | -8.8646E+03 | -1.3138E+04 | -9.0583E+03 | -4.0823E+03 | -1.2162E+04 | -4.1895E+04 |
| STD     | 2.4531E+03          | 6.5467E+02  | 1.1508E+03  | 1.3438E+03  | 1.2780E+03  | 4.8210E+01  | 1.1649E+03  | 1.2581E+03  | 4.0865E+02  | 2.8768E+02  | 1.2436E+03  | 6.9282E+02  |
| F9      |                     |             |             |             |             |             |             |             |             |             |             |             |
| Worst   | 0.0000E+00          | 7.0663E+02  | 2.0900E+00  | 3.3931E+02  | 5.6783E+02  | 3.7412E+02  | 1.7930E+01  | 0.0000E+00  | 4.0301E+02  | 1.7052E+02  | 0.0000E+00  | 0.0000E+00  |
| Average | 0.0000E+00          | 6.6341E+02  | 5.2251E-01  | 2.9352E+02  | 4.5123E+02  | 3.3656E+02  | 1.4038E+01  | 0.0000E+00  | 3.5050E+02  | 7.2797E+01  | 0.0000E+00  | 0.0000E+00  |
| Best    | 0.0000E+00          | 6.2961E+02  | 5.6843E-14  | 2.4692E+02  | 3.8412E+02  | 2.9418E+02  | 8.7782E+00  | 0.0000E+00  | 3.2658E+02  | 2.6505E+01  | 0.0000E+00  | 0.0000E+00  |
| STD     | 0.0000E+00          | 3.1910E+01  | 1.0450E+00  | 3.7772E+01  | 8.2045E+01  | 4.0240E+01  | 4.1669E+00  | 0.0000E+00  | 3.6131E+01  | 6.6103E+01  | 0.0000E+00  | 0.0000E+00  |
| F10     |                     |             |             |             |             |             |             |             |             |             |             |             |
| Worst   | 8.8818E-16          | 1.9924E+01  | 1.6431E-13  | 1.9307E-02  | 8.4589E+00  | 1.6272E+01  | 7.8494E-10  | 2.5757E-14  | 3.4042E+00  | 4.3402E-01  | 2.9310E-14  | 8.8818E-16  |
| Average | 8.8818E-16          | 1.9423E+01  | 1.0303E-13  | 9.4472E-03  | 7.7682E+00  | 9.8105E+00  | 4.1539E-10  | 9.7700E-15  | 1.8245E+00  | 1.0968E-01  | 1.1546E-14  | 8.8818E-16  |
| Best    | 8.8818E-16          | 1.8952E+01  | 4.3521E-14  | 3.3824E-04  | 7.0928E+00  | 2.3170E+00  | 6.4845E-11  | 4.4409E-15  | 1.1551E+00  | 6.6117E-04  | 8.8818E-16  | 8.8818E-16  |
| STD     | 0.0000E+00          | 4.0023E-01  | 5.3909E-14  | 8.0172E-03  | 6.7957E-01  | 5.7527E+00  | 3.2156E-10  | 1.0658E-14  | 1.0672E+00  | 2.1623E-01  | 1.2644E-14  | 0.0000E+00  |
| F11     |                     |             |             |             |             |             |             |             |             |             |             |             |
| Worst   | 0.0000E+00          | 5.8841E-01  | 2.0230E-02  | 3.1030E+01  | 1.5024E+01  | 4.5986E-01  | 5.9418E-02  | 3.9454E-02  | 3.2876E-01  | 6.7533E-01  | 3.0136E-01  | 0.0000E+00  |
| Average | 0.0000E+00          | 5.4089E-01  | 5.0574E-03  | 9.0836E+00  | 5.9464E+00  | 2.2969E-01  | 2.7528E-02  | 1.6716E-02  | 1.9871E-01  | 3.7989E-01  | 1.3220E-01  | 0.0000E+00  |
| Best    | 0.0000E+00          | 4.5020E-01  | 0.0000E+00  | 5.4626E-01  | 2.6364E+00  | 1.1258E-01  | 1.1102E-16  | 0.0000E+00  | 7.1478E-02  | 4.4130E-04  | 0.0000E+00  | 0.0000E+00  |
| STD     | 0.0000E+00          | 6.1730E-02  | 1.0115E-02  | 1.4657E+01  | 6.0586E+00  | 1.5614E-01  | 3.1985E-02  | 1.9918E-02  | 1.0506E-01  | 3.3104E-01  | 1.5560E-01  | 0.0000E+00  |
| F12     |                     |             |             |             |             |             |             |             |             |             |             |             |
| Worst   | 2.2090E-05          | 5.3071E+04  | 1.9912E-02  | 4.2285E-04  | 4.4872E+06  | 4.3171E+01  | 6.4279E-02  | 2.5172E-03  | 9.9366E+00  | 3.2393E-01  | 3.5385E-01  | 1.0142E+00  |
| Average | 7.3398E-06          | 1.3376E+04  | 7.2748E-03  | 1.3397E-04  | 1.1218E+06  | 2.4414E+01  | 5.6330E-02  | 7.8564E-04  | 4.5891E+00  | 2.2991E-01  | 1.9968E-01  | 4.3739E-01  |
| Best    | 6.8016E-08          | 2.2231E+01  | 4.8091E-05  | 3.6038E-06  | 1.0234E+01  | 1.3639E+01  | 4.1262E-02  | 3.8885E-10  | 1.2334E+00  | 1.5004E-01  | 1.3770E-01  | 2.5910E-03  |
| STD     | 8.7088E-06          | 2.6463E+04  | 9.4262E-03  | 1.9609E-04  | 2.2436E+06  | 1.3499E+01  | 1.0417E-02  | 1.1914E-03  | 3.7974E+00  | 7.6710E-02  | 1.0328E-01  | 4.0437E-01  |
| F13     |                     |             |             |             |             |             |             |             |             |             |             |             |
| Worst   | 4.2673E-05          | 3.7036E+04  | 7.7126E-01  | 2.1318E-02  | 8.4145E+05  | 3.1735E+01  | 6.0130E-01  | 1.1813E-01  | 3.0647E-01  | 6.8286E-01  | 7.3070E-01  | 9.8429E+00  |
| Average | 1.8432E-05          | 1.4949E+04  | 2.8896E-01  | 5.4671E-03  | 2.3951E+05  | 1.3111E+01  | 3.8014E-01  | 3.7320E-02  | 1.6538E-01  | 5.4638E-01  | 4.4940E-01  | 5.2416E+00  |
| Best    | 2.5705E-07          | 5.8035E+01  | 9.9259E-02  | 1.7087E-05  | 2.4995E+03  | 1.9905E+00  | 2.1468E-01  | 2.7350E-04  | 1.7032E-02  | 4.6047E-01  | 1.5378E-01  | 4.0715E-01  |
| STD     | 1.6556E-05          | 3.2255E+04  | 1.0568E-02  | 4.0346E+05  | 1.2893E+01  | 1.6531E-01  | 5.4378E-02  | 1.1949E-01  | 1.1949E-01  | 9.6117E-02  | 3.2217E-01  | 4.3678E+00  |
| (W/L/T) | (9/1/3)             | (0/13/0)    | (0/13/0)    | (0/13/0)    | (0/13/0)    | (0/13/0)    | (0/13/0)    | (0/13/0)    | (0/13/0)    | (0/13/0)    | (0/12/1)    | (1/9/3)     |
| Mean    | 1.3077E+00          | 1.0615E+01  | 4.0769E+00  | 7.2308E+00  | 9.9231E+00  | 7.6929E+00  | 5.6923E+00  | 2.9231E+00  | 8.4615E+00  | 8.6154E+00  | 5.4615E+00  | 3.3077E+00  |
| Ranking | 1                   | 12          | 4           | 7           | 11          | 10          | 6           | 2           | 8           | 9           | 5           | 3           |

Table 12: Results of the comparative methods on classical test functions (F1-F13), the dimension is fixed to 500.

| Fun No. | Comparative methods |             |             |             |             |             |             |             |             |             |             |             |
|---------|---------------------|-------------|-------------|-------------|-------------|-------------|-------------|-------------|-------------|-------------|-------------|-------------|
| Measure | AO                  | GOA         | EO          | PSO         | DA          | ALO         | GWO         | MPA         | SSA         | SCA         | WOA         | SMA         |
| F1      |                     |             |             |             |             |             |             |             |             |             |             |             |
| Worst   | 0.0000E+00          | 9.1900E+04  | 4.2300E-12  | 2.2800E+03  | 4.8100E+04  | 1.2500E+05  | 3.0300E-03  | 2.6200E-22  | 9.4500E+04  | 2.1100E+04  | 9.4900E-24  | 1.8453E-149 |
| Average | 0.0000E+00          | 8.8900E+04  | 1.5300E-12  | 1.6700E+03  | 3.7400E+04  | 9.0600E+04  | 1.6800E-03  | 1.3400E-22  | 7.6100E+04  | 1.5500E+04  | 2.6700E-24  | 3.6907E-150 |
| Best    | 0.0000E+00          | 8.1900E+04  | 1.3700E-13  | 1.2300E+03  | 2.7400E+04  | 5.9200E+04  | 7.6900E-04  | 4.7200E-24  | 5.8900E+04  | 1.0900E+04  | 1.4800E-37  | 0.0000E+00  |
| STD     | 0.0000E+00          | 4.7000E+03  | 1.9100E-12  | 4.5400E+02  | 8.7000E+03  | 3.0700E+04  | 9.8500E-04  | 1.0600E-22  | 1.4600E+04  | 5.1900E+03  | 4.5800E-24  | 8.2526E-150 |
| F2      |                     |             |             |             |             |             |             |             |             |             |             |             |
| Worst   | 2.6672E-215         | 1.7200E+137 | 5.0800E-06  | 1.6200E+161 | 1.2400E+03  | 2.6900E+247 | 2.9500E+00  | 1.9400E-10  | 1.3300E+171 | 2.3100E+02  | 3.9300E-21  | 5.8913E-92  |
| Average | 1.4218E-215         | 4.3100E+136 | 3.8000E-06  | 4.0500E+160 | 1.0400E+03  | 6.7200E+246 | 1.8200E+00  | 1.0600E-10  | 3.3200E+170 | 1.7800E+02  | 1.1800E-21  | 1.1783E-92  |
| Best    | 1.4735E-217         | 2.2500E+103 | 2.7300E-06  | 1.0400E+67  | 7.1600E+02  | 2.0600E+03  | 3.9600E-01  | 1.3800E-11  | 1.6900E+132 | 1.3500E+02  | 6.4100E-25  | 3.7965E-197 |
| STD     | 0.0000E+00          | 8.6100E+136 | 1.1200E-06  | 6.5500E+04  | 2.2500E+02  | 6.5500E+04  | 1.1400E+00  | 9.5200E-11  | 6.5500E+04  | 4.3900E+01  | 1.8700E-21  | 2.6347E-92  |
| F3      |                     |             |             |             |             |             |             |             |             |             |             |             |
| Worst   | 0.0000E+00          | 7.6400E+06  | 2.0100E+05  | 2.7100E+06  | 1.7000E+07  | 1.0500E+07  | 1.0500E+06  | 8.7700E+04  | 8.5100E+06  | 1.2300E+07  | 1.4400E+08  | 5.9228E-193 |
| Average | 0.0000E+00          | 6.0500E+06  | 1.1800E+05  | 1.5500E+06  | 1.1500E+07  | 8.1300E+06  | 8.8900E+05  | 4.8900E+04  | 5.6900E+06  | 8.5600E+06  | 8.5600E+07  | 1.2030E-193 |
| Best    | 0.0000E+00          | 3.3900E+06  | 3.6100E+04  | 7.8500E+05  | 5.9700E+06  | 4.8100E+06  | 7.3800E+05  | 1.5100E+04  | 2.7900E+06  | 6.2900E+06  | 3.3800E+07  | 0.0000E+00  |
| STD     | 0.0000E+00          | 1.8700E+06  | 9.3200E+04  | 8.7800E+05  | 4.6900E+06  | 2.3900E+06  | 1.4700E+05  | 3.9200E+04  | 2.3500E+06  | 2.6000E+06  | 5.7100E+07  | 0.0000E+00  |
| F4      |                     |             |             |             |             |             |             |             |             |             |             |             |
| Worst   | 6.3989E-217         | 9.5500E+01  | 9.8200E+01  | 6.3300E+01  | 9.9500E+01  | 8.8300E+01  | 9.0900E+01  | 1.2100E-05  | 9.7600E+01  | 9.9700E+01  | 9.9600E+01  | 2.3802E-82  |
| Average | 2.5832E-217         | 8.9700E+01  | 7.5500E+01  | 5.8300E+01  | 9.8600E+01  | 8.4100E+01  | 8.0600E+01  | 3.5700E-06  | 9.7100E+01  | 9.9600E+01  | 9.2400E+01  | 4.7605E-83  |
| Best    | 6.2842E-219         | 8.7000E+01  | 5.2500E+01  | 5.5300E+01  | 9.6800E+01  | 7.9300E+01  | 7.1200E+01  | 2.9600E-07  | 9.6400E+01  | 9.9500E+01  | 7.9900E+01  | 1.1066E-204 |
| STD     | 0.0000E+00          | 3.9100E+00  | 1.9400E+01  | 3.5100E+00  | 1.2300E+00  | 4.4100E+00  | 1.0100E+01  | 5.7000E-06  | 5.5500E-01  | 1.1500E-01  | 8.7600E+00  | 1.0645E-82  |
| F5      |                     |             |             |             |             |             |             |             |             |             |             |             |
| Worst   | 6.4568E-01          | 2.5900E+09  | 4.9900E+02  | 5.8700E+08  | 1.8100E+09  | 3.3700E+09  | 1.0700E+06  | 4.9900E+02  | 4.9200E+09  | 3.2100E+09  | 4.9800E+02  | 2.9883E+02  |
| Average | 1.6470E-01          | 2.4100E+09  | 4.9900E+02  | 5.5100E+08  | 1.1600E+09  | 2.2000E+09  | 6.5400E+05  | 4.9800E+02  | 4.3800E+09  | 2.5400E+09  | 4.9800E+02  | 2.0173E+02  |
| Best    | 8.1831E-03          | 2.2900E+09  | 4.9900E+02  | 4.5100E+08  | 6.9000E+08  | 1.7700E+09  | 1.3000E+05  | 4.9800E+02  | 3.9700E+09  | 1.7700E+09  | 4.9700E+02  | 1.5641E+01  |
| STD     | 2.6993E-01          | 1.2700E+08  | 2.5100E-02  | 6.6700E+07  | 5.3300E+08  | 7.8100E+08  | 3.9700E+05  | 8.9800E-02  | 4.0300E+08  | 6.1300E+08  | 4.2100E+01  | 1.3600E+02  |
| F6      |                     |             |             |             |             |             |             |             |             |             |             |             |
| Worst   | 6.1400E-03          | 8.0834E+05  | 1.1851E+02  | 2.3018E+05  | 3.5784E+05  | 1.0929E+06  | 1.6278E+02  | 1.0815E+02  | 1.0545E+06  | 2.6911E+05  | 1.0385E+02  | 6.2300E+01  |
| Average | 1.8268E-03          | 7.6086E+05  | 1.1766E+02  | 2.2730E+05  | 3.1464E+05  | 1.0002E+06  | 1.4463E+02  | 1.0732E+02  | 9.5250E+05  | 2.5202E+05  | 1.0107E+02  | 5.0294E+01  |
| Best    | 6.7168E-05          | 7.3346E+05  | 1.1669E+02  | 2.2237E+05  | 2.3105E+05  | 8.7263E+05  | 1.1964E+02  | 1.0565E+02  | 8.5874E+05  | 2.3662E+05  | 9.8640E+01  | 1.0348E+01  |
| STD     | 2.5734E-03          | 4.1287E+04  | 9.1754E-01  | 4.2884E+03  | 7.2403E+04  | 1.1421E+05  | 2.2367E+01  | 1.4438E+00  | 9.8146E+04  | 1.6312E+04  | 2.6227E+00  | 2.2375E+01  |
| F7      |                     |             |             |             |             |             |             |             |             |             |             |             |
| Worst   | 3.4682E-03          | 5.1100E+04  | 3.0500E-02  | 6.1800E+04  | 7.9200E+03  | 1.3900E+04  | 9.8500E-01  | 8.0900E-03  | 1.8700E+04  | 2.0700E+04  | 4.9200E-02  | 6.2744E-04  |
| Average | 9.8927E-04          | 4.7300E+04  | 1.8200E-02  | 5.8400E+04  | 4.0600E+03  | 1.0200E+04  | 7.1100E-01  | 4.4800E-03  | 1.1700E+04  | 1.7600E+04  | 3.3100E-02  | 5.0630E-04  |
| Best    | 2.2066E-04          | 4.2500E+04  | 9.0200E-03  | 5.2300E+04  | 1.2100E+03  | 5.9500E+03  | 5.2800E-01  | 2.4600E-03  | 8.6500E+03  | 1.5200E+04  | 1.3000E-02  | 4.0625E-04  |
| STD     | 1.3900E-03          | 3.5700E+03  | 1.0100E-02  | 4.3000E+03  | 2.8200E+03  | 4.1300E+03  | 2.1800E-01  | 2.4900E-03  | 4.7000E+03  | 2.7400E+03  | 1.5500E-02  | 7.9220E-05  |
| F8      |                     |             |             |             |             |             |             |             |             |             |             |             |
| Worst   | -1.3853E+04         | -3.3200E+04 | -3.8500E+04 | -9.5600E+03 | -1.5000E+04 | -9.0300E+04 | -1.0200E+04 | -5.1000E+04 | -2.6700E+04 | -1.2100E+04 | -1.2600E+05 | -1.1666E+05 |
| Average | -1.8631E+04         | -3.7000E+04 | -4.2600E+04 | -1.1900E+04 | -1.7000E+04 | -9.0300E+04 | -2.9100E+04 | -5.5300E+04 | -3.2500E+04 | -1.3300E+04 | -1.3900E+05 | -1.2362E+05 |
| Best    | -2.2142E+04         | -3.9500E+04 | -4.5800E+04 | -1.5600E+04 | -1.9000E+04 | -9.0300E+04 | -3.6300E+04 | -5.9600E+04 | -3.7300E+04 | -1.4500E+04 | -1.5000E+05 | -1.2564E+05 |
| STD     | 2.9872E+03          | 2.6900E+03  | 3.2600E+03  | 2.8500E+03  | 1.6400E+03  | 0.0000E+00  | 1.2600E+04  | 4.7200E+03  | 4.7100E+03  | 1.0400E+03  | 9.9700E+03  | 3.9005E+03  |
| F9      |                     |             |             |             |             |             |             |             |             |             |             |             |
| Worst   | 0.0000E+00          | 8.4800E+03  | 1.0200E+00  | 8.3500E+03  | 6.6500E+03  | 6.1800E+03  | 3.5800E+02  | 0.0000E+00  | 6.0000E+03  | 1.4800E+03  | 0.0000E+00  | 0.0000E+00  |
| Average | 0.0000E+00          | 8.1600E+03  | 2.5500E-01  | 7.8200E+03  | 5.9700E+03  | 5.7900E+03  | 2.7700E+02  | 0.0000E+00  | 5.9500E+03  | 1.2700E+03  | 0.0000E+00  | 0.0000E+00  |
| Best    | 0.0000E+00          | 8.0400E+03  | 5.0600E-10  | 7.2600E+03  | 5.2700E+03  | 5.2900E+03  | 1.2100E+02  | 0.0000E+00  | 5.8700E+03  | 1.1400E+03  | 0.0000E+00  | 0.0000E+00  |
| STD     | 0.0000E+00          | 2.1100E+02  | 5.0900E-01  | 5.3400E+02  | 5.8100E+02  | 3.7900E+02  | 1.0600E+02  | 0.0000E+00  | 5.4600E+01  | 1.4400E+02  | 0.0000E+00  | 0.0000E+00  |
| F10     |                     |             |             |             |             |             |             |             |             |             |             |             |
| Worst   | 8.8800E-16          | 2.0400E+01  | 1.5800E-03  | 1.8900E+01  | 1.9100E+01  | 1.9800E+01  | 2.5200E+00  | 3.7700E-09  | 2.0800E+01  | 2.0900E+01  | 3.9200E-09  | 8.8818E-16  |
| Average | 8.8800E-16          | 2.0100E+01  | 7.0900E-04  | 1.8600E+01  | 1.8500E+01  | 1.3500E+01  | 2.1400E+00  | 2.4200E-09  | 2.0500E+01  | 2.0900E+01  | 1.2100E-09  | 8.8818E-16  |
| Best    | 8.8800E-16          | 1.9800E+01  | 1.9100E-04  | 1.8300E+01  | 1.7300E+01  | 8.8800E-16  | 1.4800E+00  | 1.4100E-09  | 2.0200E+01  | 2.0900E+01  | 1.1100E-10  | 8.8818E-16  |
| STD     | 0.0000E+00          | 2.6100E-01  | 6.2700E-04  | 2.5200E-01  | 8.6500E-01  | 9.0800E+00  | 4.5700E-01  | 1.0100E-09  | 2.6000E-01  | 2.1700E-02  | 1.8200E-09  | 0.0000E+00  |
| F11     |                     |             |             |             |             |             |             |             |             |             |             |             |
| Worst   | 0.0000E+00          | 6.3700E+03  | 1.4600E-09  | 1.9700E+03  | 2.8000E+03  | 8.2800E+03  | 1.3400E+00  | 0.0000E+00  | 6.6500E+03  | 2.2400E+03  | 0.0000E+00  | 0.0000E+00  |
| Average | 0.0000E+00          | 5.7200E+03  | 7.4500E-10  | 1.8900E+03  | 2.0500E+03  | 6.4600E+03  | 1.1400E+00  | 0.0000E+00  | 6.5100E+03  | 1.6500E+03  | 0.0000E+00  | 0.0000E+00  |
| Best    | 0.0000E+00          | 5.2900E+03  | 2.6200E-10  | 1.8100E+03  | 1.4400E+03  | 5.5700E+03  | 9.1900E-01  | 0.0000E+00  | 6.1500E+03  | 7.9500E+02  | 0.0000E+00  | 0.0000E+00  |
| STD     | 0.0000E+00          | 4.8400E+02  | 5.1900E-10  | 6.6700E+01  | 5.6400E+02  | 1.2300E+03  | 1.7100E-01  | 0.0000E+00  | 2.4100E+02  | 6.2600E+02  | 0.0000E+00  | 0.0000E+00  |
| F12     |                     |             |             |             |             |             |             |             |             |             |             |             |
| Worst   | 2.2090E-05          | 6.3500E+03  | 7.0800E-09  | 2.0600E+03  | 3.2400E+03  | 6.2400E+03  | 1.2800E+00  | 0.0000E+00  | 6.1600E+03  | 3.3600E+03  | 1.1100E-16  | 1.0142E+00  |
| Average | 7.3398E-06          | 5.8700E+03  | 3.6600E-09  | 1.9300E+03  | 2.1300E+03  | 5.4900E+03  | 1.0100E+00  | 0.0000E+00  | 5.6500E+03  | 2.2300E+03  | 2.7800E-17  | 4.3739E-01  |
| Best    | 6.8016E-08          | 5.4400E+03  | 5.5000E-10  | 1.8300E+03  | 1.2300E+03  | 4.2900E+03  | 3.6700E-01  | 0.0000E+00  | 5.2500E+03  | 1.3000E+03  | 0.0000E+00  | 2.5910E-03  |
| STD     | 8.7088E-06          | 3.7500E+02  | 2.8000E-09  | 9.7300E+01  | 8.6500E+02  | 8.6100E+02  | 4.3100E-01  | 0.0000E+00  | 3.8300E+02  | 8.8600E+02  | 5.5500E-17  | 4.0437E-01  |
| F13     |                     |             |             |             |             |             |             |             |             |             |             |             |
| Worst   | 4.2673E-05          | 7.7972E+09  | 4.9839E+01  | 2.8311E+08  | 2.7634E+09  | 7.8310E+09  | 3.0577E+02  | 4.9837E+01  | 8.6217E+09  | 1.0576E+10  | 4.7792E+01  | 9.8429E+00  |
| Average | 1.8432E-05          | 7.1971E+09  | 4.9581E+01  | 2.6358E+08  | 1.5912E+09  | 7.2341E+09  | 2.0353E+02  | 4.9799E+01  | 7.8299E+09  | 8.8182E+09  | 3.9005E+01  | 5.2416E+00  |
| Best    | 2.5705E-07          | 6.5728E+09  | 4.9172E+01  | 2.4510E+08  | 1.1179E+09  | 6.6313E+09  | 1.0472E+02  | 4.9764E+01  | 7.2658E+09  | 6.5647E+09  | 3.0093E+01  | 4.0715E-01  |
| STD     | 1.6556E-05          | 6.0494E+08  | 2.9263E-01  | 1.5540E+07  | 7.8420E+08  | 5.7852E+08  | 8.3825E+01  | 3.7117E-02  | 6.3361E+08  | 1.7158E+09  | 8.0546E+00  | 4.3678E+00  |
| (W/L/T) | (9/3/1)             | (0/13/0)    | (0/13/0)    | (0/13/0)    | (0/13/0)    | (0/13/0)    | (0/13/0)    | (1/11/1)    | (0/13/0)    | (0/13/0)    | (1/11/1)    | (1/11/1)    |
| Mean    | 1.9231E+00          | 9.6923E+00  | 4.6154E+00  | 8.2308E+00  | 8.9231E+00  | 9.0769E+00  | 6.0769E+00  | 3.0769E+00  | 1.0077E+01  | 9.5385E+00  | 3.7692E+00  | 2.0000E+00  |
| Ranking | 1                   | 11          | 5           | 7           | 8           | 9           | 6           | 3           | 12          | 10          | 4           | 2           |

Table 13: Review of CEC2017 benchmark function problems.

| Type                        | No. | Description                                             | F <sub>i</sub> * |
|-----------------------------|-----|---------------------------------------------------------|------------------|
| Unimodal functions          | 1   | Shifted and Rotated Bent Cigar Function                 | 100              |
|                             | 3   | Shifted and Rotated Zakharov Function                   | 300              |
| Simple Multimodal Functions | 4   | Shifted and Rotated Rosenbrock's Function               | 400              |
|                             | 5   | Shifted and Rotated Rastrigin's Function                | 500              |
|                             | 6   | Shifted and Rotated Expanded Scaffer's F6 Function      | 600              |
|                             | 7   | Shifted and Rotated Lunacek Bi-Rastrigin Function       | 700              |
|                             | 8   | Shifted and Rotated Non-Continuous Rastrigin's Function | 800              |
|                             | 9   | Shifted and Rotated Levy Function                       | 900              |
|                             | 10  | Shifted and Rotated Schwefel's Function                 | 1000             |
| Hybrid functions            | 11  | Hybrid Function 1 (N=3)                                 | 1100             |
|                             | 12  | Hybrid Function 2 (N=3)                                 | 1200             |
|                             | 13  | Hybrid Function 3 (N=3)                                 | 1300             |
|                             | 14  | Hybrid Function 4 (N=4)                                 | 1400             |
|                             | 15  | Hybrid Function 5 (N=4)                                 | 1500             |
|                             | 16  | Hybrid Function 6 (N=4)                                 | 1600             |
|                             | 17  | Hybrid Function 6 (N=5)                                 | 1700             |
|                             | 18  | Hybrid Function 6 (N=5)                                 | 1800             |
|                             | 19  | Hybrid Function 6 (N=5)                                 | 1900             |
|                             | 20  | Hybrid Function 6 (N=6)                                 | 2000             |
| Composition Functions       | 21  | Composition Function 1 (N=3)                            | 2100             |
|                             | 22  | Composition Function 2 (N=3)                            | 2200             |
|                             | 23  | Composition Function 3 (N=4)                            | 2300             |
|                             | 24  | Composition Function 4 (N=4)                            | 2400             |
|                             | 25  | Composition Function 5 (N=5)                            | 2500             |
|                             | 26  | Composition Function 6 (N=5)                            | 2600             |
|                             | 27  | Composition Function 7 (N=6)                            | 2700             |
|                             | 28  | Composition Function 8 (N=6)                            | 2800             |
|                             | 29  | Composition Function 9 (N=3)                            | 2900             |
|                             | 30  | Composition Function 10 (N=3)                           | 3000             |

10. By inspecting these curves, one can see that the AO exhibits the fastest convergence for (F5, F9, F16, F20, F21, F24, F28, and F30) and a comparable convergence for (F1, F11, F14, F15, F18, F22, and F 27).

This observation states that AO can be considered as one of the reliable algorithms.

Table 14: Results of the comparative methods on CEC2017 test functions.

| Fun No. | Comparative methods |            |            |            |            |            |            |            |            |
|---------|---------------------|------------|------------|------------|------------|------------|------------|------------|------------|
| Measure | AO                  | GA         | PSO        | CS         | GWO        | SSA        | EO         | GSA        | CMA-ES     |
| F1      |                     |            |            |            |            |            |            |            |            |
| Average | 2.9600E+02          | 9.8000E+03 | 3.9600E+03 | 2.9600E+02 | 3.2500E+05 | 3.4000E+03 | 2.4700E+03 | 2.9600E+02 | 1.0000E+02 |
| STD     | 2.7500E+02          | 5.9400E+03 | 4.4600E+03 | 2.7500E+02 | 1.0700E+05 | 3.6700E+03 | 2.2100E+03 | 2.7500E+02 | 0.0000E+00 |
| F3      |                     |            |            |            |            |            |            |            |            |
| Average | 1.1420E+03          | 8.7200E+03 | 3.0000E+02 | 1.0800E+04 | 1.5400E+03 | 3.0000E+02 | 3.0000E+02 | 1.0800E+04 | 3.0000E+02 |
| STD     | 2.3500E+02          | 5.9000E+03 | 1.9000E-10 | 1.6000E+03 | 1.8900E+03 | 0.0000E+00 | 2.4000E-08 | 1.6200E+03 | 0.0000E+00 |
| F4      |                     |            |            |            |            |            |            |            |            |
| Average | 4.0600E+02          | 4.1100E+02 | 4.0600E+02 | 4.0700E+02 | 4.1000E+02 | 4.0600E+02 | 4.0400E+02 | 4.0700E+02 | 4.0000E+02 |
| STD     | 8.5600E+00          | 1.8500E+01 | 3.2800E+00 | 2.9200E+00 | 7.5500E+00 | 1.0100E+01 | 7.9100E-01 | 2.9200E+00 | 0.0000E+00 |
| F5      |                     |            |            |            |            |            |            |            |            |
| Average | 5.1100E+02          | 5.1600E+02 | 5.1300E+02 | 5.5700E+02 | 5.1400E+02 | 5.2200E+02 | 5.1100E+02 | 5.5700E+02 | 5.3000E+02 |
| STD     | 7.1540E+01          | 6.9300E+00 | 6.5400E+00 | 8.4100E+00 | 6.1000E+00 | 1.0500E+01 | 3.6700E+00 | 8.4000E+00 | 5.8300E+01 |
| F6      |                     |            |            |            |            |            |            |            |            |
| Average | 6.2376E+02          | 6.0000E+02 | 6.0000E+02 | 6.2200E+02 | 6.0100E+02 | 6.1000E+02 | 6.0000E+02 | 6.2200E+02 | 6.8200E+02 |
| STD     | 1.3928E+01          | 6.6800E-02 | 9.8000E-01 | 9.0200E+00 | 8.8000E-01 | 8.2600E+00 | 1.5000E-04 | 9.0200E+00 | 3.5400E+01 |
| F7      |                     |            |            |            |            |            |            |            |            |
| Average | 7.1500E+02          | 7.2800E+02 | 7.1900E+02 | 7.1500E+02 | 7.3000E+02 | 7.4100E+02 | 7.2100E+02 | 7.1500E+02 | 7.1300E+02 |
| STD     | 1.8520E+00          | 7.2900E+00 | 5.1000E+00 | 1.5600E+00 | 8.6000E+00 | 1.6600E+01 | 5.7400E+00 | 1.5500E+00 | 1.6300E+00 |
| F8      |                     |            |            |            |            |            |            |            |            |
| Average | 8.2000E+02          | 8.2100E+02 | 8.1100E+02 | 8.2100E+02 | 8.1400E+02 | 8.2300E+02 | 8.1000E+02 | 8.2100E+02 | 8.2900E+02 |
| STD     | 7.2560E+00          | 8.9600E+00 | 5.4700E+00 | 4.6900E+00 | 8.2600E+00 | 9.9500E+00 | 2.9200E+00 | 4.6900E+00 | 5.3000E+01 |
| F9      |                     |            |            |            |            |            |            |            |            |
| Average | 9.0000E+02          | 9.1000E+02 | 9.0000E+02 | 9.0000E+02 | 9.1100E+02 | 9.4400E+02 | 9.0000E+02 | 9.0000E+02 | 4.6700E+03 |
| STD     | 0.0000E+00          | 1.5200E+01 | 5.9000E-14 | 0.0000E+00 | 1.9500E+01 | 1.0500E+02 | 2.2700E-02 | 5.9000E-15 | 2.0600E+03 |
| F10     |                     |            |            |            |            |            |            |            |            |
| Average | 1.7060E+03          | 1.7200E+03 | 1.4700E+03 | 2.6900E+03 | 1.5300E+03 | 1.8600E+03 | 1.4200E+03 | 2.6900E+03 | 2.5900E+03 |
| STD     | 3.6200E+02          | 2.5200E+02 | 2.1500E+02 | 2.9800E+02 | 2.8700E+02 | 2.9500E+02 | 2.6200E+02 | 2.9800E+02 | 4.1400E+02 |
| F11     |                     |            |            |            |            |            |            |            |            |
| Average | 1.1250E+03          | 1.1300E+03 | 1.1100E+03 | 1.1300E+03 | 1.1400E+03 | 1.1800E+03 | 1.1100E+03 | 1.1300E+03 | 1.1100E+03 |
| STD     | 2.3150E+01          | 2.3800E+01 | 6.2800E+00 | 1.0500E+01 | 5.4100E+01 | 5.9800E+01 | 5.0200E+00 | 1.0500E+01 | 2.5400E+01 |
| F12     |                     |            |            |            |            |            |            |            |            |
| Average | 1.0031E+04          | 3.7300E+04 | 1.4500E+04 | 7.1000E+05 | 6.2500E+05 | 1.9800E+06 | 1.0300E+04 | 7.0300E+05 | 1.6300E+03 |
| STD     | 2.3200E+02          | 3.4800E+04 | 1.1300E+04 | 4.2000E+00 | 1.1300E+06 | 1.9100E+06 | 9.7900E+03 | 4.2100E+04 | 1.9800E+02 |
| F13     |                     |            |            |            |            |            |            |            |            |
| Average | 8.0190E+03          | 1.0800E+04 | 8.6000E+03 | 1.1100E+04 | 9.8400E+03 | 1.6100E+04 | 8.0200E+03 | 1.1100E+04 | 1.3200E+03 |
| STD     | 5.6234E+03          | 8.9300E+03 | 5.1200E+03 | 2.1100E+03 | 5.6300E+03 | 1.0500E+04 | 6.7200E+03 | 2.1100E+03 | 7.8300E+01 |
| F14     |                     |            |            |            |            |            |            |            |            |
| Average | 1.4490E+03          | 7.0500E+03 | 1.4800E+03 | 7.1500E+03 | 3.4000E+03 | 1.5100E+03 | 1.4600E+03 | 7.1500E+03 | 1.4500E+03 |
| STD     | 5.4000E+01          | 8.1600E+03 | 4.2500E+01 | 1.4900E+03 | 1.9500E+03 | 5.1100E+01 | 3.2500E+01 | 1.4900E+03 | 5.6000E+01 |
| F15     |                     |            |            |            |            |            |            |            |            |
| Average | 1.7100E+03          | 9.3000E+03 | 1.7100E+03 | 1.8000E+04 | 3.8100E+03 | 2.2400E+03 | 1.5900E+03 | 1.8000E+04 | 1.5100E+03 |
| STD     | 2.7600E+02          | 8.9800E+03 | 2.8300E+02 | 5.5000E+03 | 3.8600E+03 | 5.7100E+02 | 4.8000E+01 | 5.5000E+03 | 1.6400E+01 |
| F16     |                     |            |            |            |            |            |            |            |            |
| Average | 1.6240E+03          | 1.7900E+03 | 1.8600E+03 | 2.1500E+03 | 1.7300E+03 | 1.7300E+03 | 1.6500E+03 | 2.1500E+03 | 1.8200E+03 |
| STD     | 4.0000E+01          | 1.2900E+02 | 1.2800E+02 | 1.0600E+02 | 1.2400E+02 | 1.2700E+02 | 5.0900E+01 | 1.0600E+02 | 2.3000E+02 |
| F17     |                     |            |            |            |            |            |            |            |            |
| Average | 1.7420E+03          | 1.7500E+03 | 1.7600E+03 | 1.8600E+03 | 1.7600E+03 | 1.7700E+03 | 1.7300E+03 | 1.8600E+03 | 1.8300E+03 |
| STD     | 2.9000E+01          | 3.9800E+01 | 4.7500E+01 | 1.0800E+02 | 3.1300E+01 | 3.4200E+01 | 1.8100E+01 | 1.0800E+02 | 1.7600E+02 |
| F18     |                     |            |            |            |            |            |            |            |            |
| Average | 8.7120E+03          | 1.5700E+04 | 1.4600E+04 | 8.7200E+03 | 2.5800E+04 | 2.3400E+04 | 2.2500E+04 | 8.7200E+03 | 1.8300E+03 |
| STD     | 3.2510E+03          | 1.2800E+04 | 1.1900E+04 | 5.0600E+03 | 1.5800E+04 | 1.4000E+04 | 1.1400E+04 | 5.0600E+03 | 1.3500E+01 |
| F19     |                     |            |            |            |            |            |            |            |            |
| Average | 1.9440E+03          | 9.6900E+03 | 2.6000E+03 | 4.5000E+04 | 9.8700E+03 | 2.9200E+03 | 1.9500E+03 | 1.3700E+04 | 1.9200E+03 |
| STD     | 3.0000E+01          | 6.7700E+03 | 2.1900E+03 | 1.9000E+04 | 6.3700E+03 | 1.8700E+03 | 4.7100E+01 | 1.9200E+04 | 2.8700E+01 |
| F20     |                     |            |            |            |            |            |            |            |            |
| Average | 2.0180E+03          | 2.0600E+03 | 2.0900E+03 | 2.2700E+03 | 2.0800E+03 | 2.0900E+03 | 2.0200E+03 | 2.2700E+03 | 2.4900E+03 |
| STD     | 2.1000E+01          | 6.0000E+01 | 6.2300E+01 | 8.1700E+01 | 5.2000E+01 | 4.9300E+01 | 2.2300E+01 | 8.1700E+01 | 2.4300E+02 |
| F21     |                     |            |            |            |            |            |            |            |            |
| Average | 2.2050E+03          | 2.3000E+03 | 2.2800E+03 | 2.3600E+03 | 2.3200E+03 | 2.2500E+03 | 2.3100E+03 | 2.3600E+03 | 2.3200E+03 |
| STD     | 4.0000E+01          | 4.3800E+01 | 5.4000E+01 | 2.8200E+01 | 7.0000E+00 | 6.0400E+01 | 2.1000E+01 | 2.8200E+01 | 6.7800E+01 |
| F22     |                     |            |            |            |            |            |            |            |            |
| Average | 2.3050E+03          | 2.3000E+03 | 2.3100E+03 | 2.3000E+03 | 2.3100E+03 | 2.3000E+03 | 2.3000E+03 | 2.3000E+03 | 3.5300E+03 |
| STD     | 2.2000E+01          | 2.3800E+00 | 6.6100E+01 | 7.0000E-02 | 1.6800E+01 | 1.1800E+01 | 1.8400E+01 | 7.2000E-02 | 8.4800E+02 |
| F23     |                     |            |            |            |            |            |            |            |            |
| Average | 2.6200E+03          | 2.6300E+03 | 2.6200E+03 | 2.7400E+03 | 2.6200E+03 | 2.6200E+03 | 2.6200E+03 | 2.7400E+03 | 2.7300E+03 |
| STD     | 1.2000E+01          | 1.3400E+01 | 9.2300E+00 | 3.9100E+01 | 8.4700E+00 | 8.6900E+00 | 5.5300E+00 | 3.9100E+01 | 2.4300E+02 |
| F24     |                     |            |            |            |            |            |            |            |            |
| Average | 2.6860E+03          | 2.7600E+03 | 2.6900E+03 | 2.7400E+03 | 2.7400E+03 | 2.7300E+03 | 2.7400E+03 | 2.7400E+03 | 2.7000E+03 |
| STD     | 1.6000E+01          | 1.4900E+01 | 1.0800E+02 | 5.5500E+00 | 8.7300E+00 | 6.4400E+01 | 6.9000E+00 | 5.5200E+00 | 7.3400E+01 |
| F25     |                     |            |            |            |            |            |            |            |            |
| Average | 2.9190E+03          | 2.9500E+03 | 2.9200E+03 | 2.9400E+03 | 2.9400E+03 | 2.9200E+03 | 2.9300E+03 | 2.9400E+03 | 2.9300E+03 |
| STD     | 1.9100E+01          | 1.9300E+01 | 2.5000E+01 | 1.5300E+01 | 2.3600E+01 | 2.3900E+01 | 1.9800E+01 | 1.5400E+01 | 2.0900E+01 |
| F26     |                     |            |            |            |            |            |            |            |            |
| Average | 3.0060E+03          | 3.1100E+03 | 2.9500E+03 | 3.4400E+03 | 3.2200E+03 | 2.9000E+03 | 2.9700E+03 | 3.4400E+04 | 3.4600E+03 |
| STD     | 1.4500E+02          | 3.3500E+02 | 2.5000E+02 | 6.2900E+02 | 4.2700E+02 | 3.6600E+01 | 1.6500E+02 | 6.4000E+05 | 5.9900E+02 |
| F27     |                     |            |            |            |            |            |            |            |            |
| Average | 3.0900E+03          | 3.1200E+03 | 3.1200E+03 | 3.2600E+03 | 3.1000E+03 | 3.0900E+03 | 3.0910E+03 | 3.2600E+03 | 3.1400E+03 |
| STD     | 8.3700E+00          | 1.9200E+01 | 2.5000E+01 | 4.1700E+01 | 2.1800E+01 | 2.7800E+00 | 2.2400E+00 | 4.1700E+01 | 2.1400E+01 |
| F28     |                     |            |            |            |            |            |            |            |            |
| Average | 3.2110E+03          | 3.3200E+03 | 3.3200E+03 | 3.4600E+03 | 3.3900E+03 | 3.2100E+03 | 3.3000E+03 | 3.4600E+03 | 3.4000E+03 |
| STD     | 4.6840E+01          | 1.2600E+02 | 1.2200E+02 | 3.3800E+01 | 1.0200E+02 | 1.1300E+02 | 1.3400E+02 | 3.3800E+01 | 1.3100E+02 |
| F29     |                     |            |            |            |            |            |            |            |            |
| Average | 3.1900E+03          | 3.2500E+03 | 3.2000E+03 | 3.4500E+03 | 3.1900E+03 | 3.2100E+03 | 3.1700E+03 | 3.4500E+03 | 3.2100E+03 |
| STD     | 2.9000E+01          | 8.2000E+01 | 5.2300E+01 | 1.7100E+02 | 3.2900E+01 | 5.1700E+01 | 2.4700E+01 | 1.7100E+02 | 1.1000E+02 |
| F30     |                     |            |            |            |            |            |            |            |            |
| Average | 2.9014E+05          | 5.3700E+05 | 3.5100E+05 | 9.4000E+05 | 2.9800E+05 | 4.2100E+05 | 2.9700E+05 | 1.3000E+06 | 3.0500E+05 |
| STD     | 5.2314E+04          | 6.3700E+05 | 5.0500E+05 | 3.6000E+05 | 5.2800E+05 | 5.6800E+05 | 4.5900E+05 | 3.6400E+05 | 4.4500E+05 |
| (W/L/T) | (9 13 7)            | (0 27 2)   | (0 23 6)   | (0 24 5)   | (0 28 1)   | (3 21 5)   | (0 24 5)   | (0 24 5)   | (8 17 3)   |
| Mean    | 2.4138E+00          | 5.6207E+00 | 3.4828E+00 | 6.3448E+00 | 5.3793E+00 | 4.8276E+00 | 2.5517E+00 | 6.3793E+00 | 4.6552E+00 |
| Ranking | 1                   | 7          | 3          | 8          | 6          | 5          | 2          | 9          | 4          |



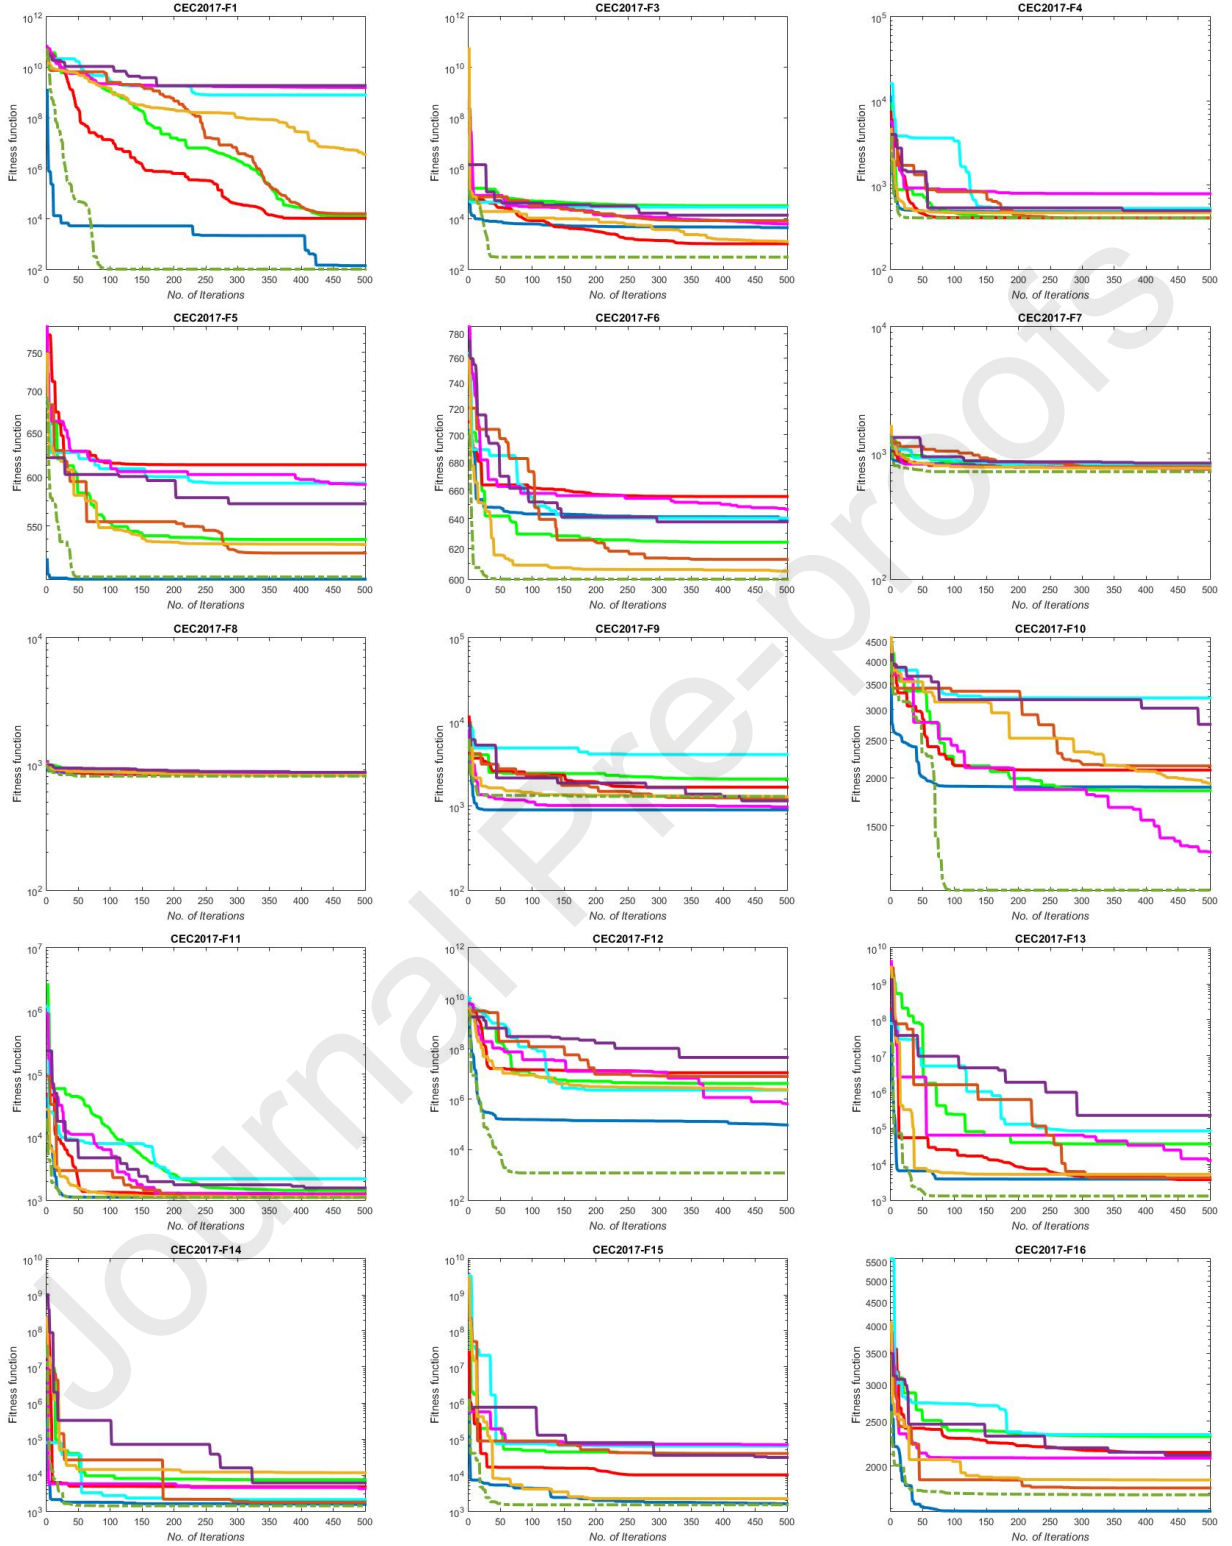



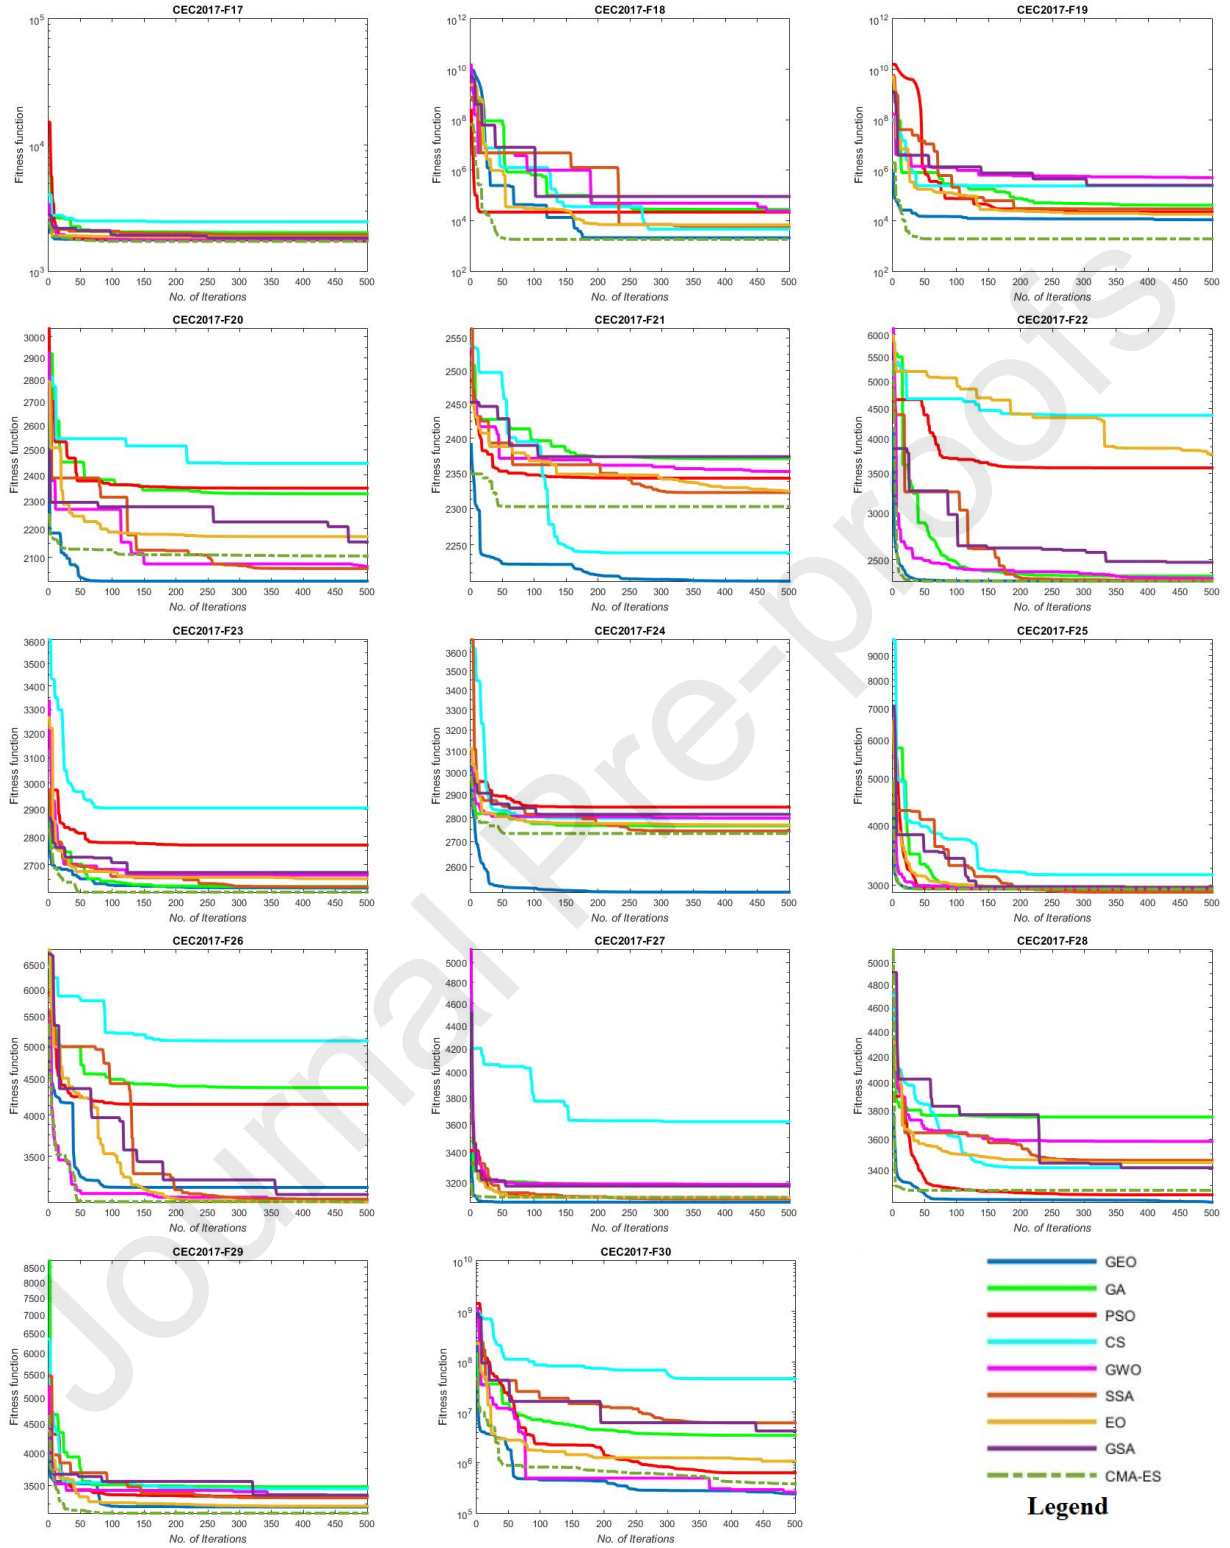

Figure 10: Convergence behavior of the comparative algorithms on CEC2017 test functions.

Table 15: Review of CEC2019 benchmark function problems.

| No. | Functions                                    | $F_i^* = F_i(x^*)$ | Dim | Search range    |
|-----|----------------------------------------------|--------------------|-----|-----------------|
| 1   | Storn's Chebyshev Polynomial Fitting Problem | 1                  | 9   | [-8192, 8192]   |
| 2   | Inverse Hilbert Matrix Problem               | 1                  | 16  | [-16384, 16384] |
| 3   | Lennard-Jones Minimum Energy Cluster         | 1                  | 18  | [-4, 4]         |
| 4   | Rastrigin's Function                         | 1                  | 10  | [-100, 100]     |
| 5   | Griewangk's Function                         | 1                  | 10  | [-100, 100]     |
| 6   | Weierstrass Function                         | 1                  | 10  | [-100, 100]     |
| 7   | Modified Schwefel's Function                 | 1                  | 10  | [-100, 100]     |
| 8   | Expanded Schaffer's F6 Function              | 1                  | 10  | [-100, 100]     |
| 9   | Happy Cat Function                           | 1                  | 10  | [-100, 100]     |
| 10  | Ackley Function                              | 1                  | 10  | [-100, 100]     |

#### 4.3. Results comparisons using CEC2019 test functions

This section details the AO analysis while testing with ten functions of recent CEC benchmarks (CEC2019); the specification of the functions has been listed in Table 15. The AO has been implemented with 500 iterations and 50 population sizes for 30 independent runs. Its results compared with GOA EO, PSO, DA, ALO, and GWO, MPA, SSA, SCA, WOA, and SMA. The comparison has performed through the worst, average, best, and STD values by the considered algorithms across the course of the functions, as reported in Table 16. Moreover, the Friedman mean rank values and final ranks have involved in the last lines of the table (see Table 16). The results confirm the proposed AO's superiority in dealing with these challenging test-bed functions, as it is classified as the best algorithm for half of these functions.

Meanwhile, the MPA success for three functions, the EO, and SMA for only one function out of this set. Sequentially, AO is located in the first position regarding the chain counterparts. The convergence curves of Figure 11 shows the efficiency of the AO in converging for high qualified solutions with significant convergence speed as exhibited in F1, F7, F8, and F10.

Table 16: Results of the comparative methods on CEC2019 test functions.

| Fun No. | Comparative methods |            |             |             |            |            |            |             |            |            |            |              |
|---------|---------------------|------------|-------------|-------------|------------|------------|------------|-------------|------------|------------|------------|--------------|
|         | AO                  | GOA        | EO          | PSO         | DA         | ALO        | GWO        | MPA         | SSA        | SCA        | WOA        | SMA          |
| F1      |                     |            |             |             |            |            |            |             |            |            |            |              |
| Worst   | 5.7185E+04          | 4.0133E+10 | 2.8491E+09  | 2.1499E+13  | 3.6220E+10 | 5.3112E+10 | 3.2839E+08 | 4.4140E+04  | 1.1307E+10 | 1.2002E+10 | 1.2404E+11 | 59119.21888  |
| Average | 4.8726E+04          | 1.3203E+10 | 9.3131E+08  | 8.0403E+12  | 2.1128E+10 | 2.4366E+10 | 1.0739E+08 | 3.7464E+04  | 7.3245E+09 | 4.6112E+09 | 5.7448E+10 | 49496.82449  |
| Best    | 3.9908E+04          | 2.9754E+09 | 3.9735E+04  | 8.1972E+11  | 1.2918E+10 | 4.5166E+09 | 5.1689E+05 | 3.2396E+04  | 2.4621E+09 | 1.3097E+09 | 1.5327E+09 | 43022.95047  |
| STD     | 6.4128E+03          | 1.5418E+10 | 1.3273E+09  | 8.6372E+12  | 9.2900E+09 | 2.2029E+10 | 1.5077E+08 | 4.7886E+03  | 3.4825E+09 | 4.2196E+09 | 4.7046E+10 | 7249.678206  |
| F2      |                     |            |             |             |            |            |            |             |            |            |            |              |
| Worst   | 1.7343E+01          | 1.7468E+01 | 1.7343E+01  | 1.5848E+04  | 6.0358E+02 | 1.7349E+01 | 1.7344E+01 | 1.7343E+01  | 1.7391E+01 | 1.7538E+01 | 1.7363E+01 | 17.37579915  |
| Average | 1.7343E+01          | 1.7397E+01 | 1.7343E+01  | 1.2323E+04  | 1.3515E+02 | 1.7345E+01 | 1.7344E+01 | 1.7343E+01  | 1.7355E+01 | 1.7468E+01 | 1.7354E+01 | 17.36710062  |
| Best    | 1.7343E+01          | 1.7367E+01 | 1.7343E+01  | 8.2815E+03  | 1.7343E+01 | 1.7343E+01 | 1.7344E+01 | 1.7343E+01  | 1.7343E+01 | 1.7414E+01 | 1.7346E+01 | 17.35597052  |
| STD     | 1.3292E-04          | 4.0848E-02 | 5.0243E-15  | 3.0180E+03  | 2.6186E+02 | 2.2146E-03 | 1.3962E-04 | 1.2596E-07  | 2.0765E-02 | 4.6095E-02 | 6.1916E-03 | 0.007884415  |
| F3      |                     |            |             |             |            |            |            |             |            |            |            |              |
| Worst   | 1.2702E+01          | 1.2702E+01 | 1.2702E+01  | 1.2702E+01  | 1.2705E+01 | 1.2702E+01 | 1.2702E+01 | 1.2702E+01  | 1.2702E+01 | 1.2703E+01 | 1.2702E+01 | 12.70432773  |
| Average | 1.2702E+01          | 1.2702E+01 | 1.2702E+01  | 1.2702E+01  | 1.2703E+01 | 1.2702E+01 | 1.2702E+01 | 1.2702E+01  | 1.2702E+01 | 1.2703E+01 | 1.2702E+01 | 12.70285328  |
| Best    | 1.2702E+01          | 1.2702E+01 | 1.2702E+01  | 1.2702E+01  | 1.2702E+01 | 1.2702E+01 | 1.2702E+01 | 1.2702E+01  | 1.2702E+01 | 1.2703E+01 | 1.2702E+01 | 12.70247222  |
| STD     | 1.8286E-06          | 8.1884E-12 | 1.5384E-15  | 0.0000E+00  | 1.1169E-03 | 8.8818E-16 | 1.7866E-06 | 0.0000E+00  | 1.7764E-15 | 8.1441E-05 | 7.4263E-07 | 0.000824434  |
| F4      |                     |            |             |             |            |            |            |             |            |            |            |              |
| Worst   | 7.7626E+01          | 5.4726E+01 | 2.4077E+01  | 2.3904E+01  | 3.2190E+03 | 1.1342E+02 | 1.6793E+02 | 1.2958E+01  | 4.8753E+01 | 3.6227E+03 | 8.6610E+02 | 40.86124872  |
| Average | 6.1750E+01          | 3.2867E+01 | 1.7864E+01  | 1.7327E+01  | 1.2762E+03 | 5.6115E+01 | 7.5948E+01 | 8.9948E+00  | 3.4226E+01 | 1.9761E+03 | 5.8922E+02 | 26.12215256  |
| Best    | 4.2306E+01          | 8.9569E+00 | 6.9995E+00  | 4.9752E+00  | 3.4288E+01 | 1.0945E+01 | 4.9114E+01 | 5.0030E+00  | 2.1889E+01 | 1.0981E+03 | 2.2660E+02 | 10.42762116  |
| STD     | 1.3914E+01          | 1.9711E+01 | 6.8265E+00  | 7.3781E+00  | 1.4697E+03 | 3.7118E+01 | 5.1553E+01 | 3.3786E+00  | 1.0776E+01 | 9.6264E+02 | 2.8278E+02 | 11.4476303   |
| F5      |                     |            |             |             |            |            |            |             |            |            |            |              |
| Worst   | 1.4154E+00          | 9.7766E+00 | 1.1442E+01  | 1.1279E+01  | 1.0841E+01 | 8.5764E+00 | 1.2052E+01 | 4.0291E+00  | 6.2782E+00 | 1.1812E+01 | 1.1329E+01 | 1.754317948  |
| Average | 1.3545E+00          | 8.4847E+00 | 1.0754E+01  | 9.9834E+00  | 9.6346E+00 | 5.2938E+00 | 1.1649E+01 | 2.3349E+00  | 5.4861E+00 | 1.1146E+01 | 9.6370E+00 | 1.374072236  |
| Best    | 1.1530E+00          | 7.6595E+00 | 9.8895E+00  | 8.8972E+00  | 8.5186E+00 | 2.9803E+00 | 1.1464E+01 | 1.2088E+00  | 4.5119E+00 | 9.8660E+00 | 8.2812E+00 | 1.136743818  |
| STD     | 9.3665E-02          | 8.7632E-01 | 6.6035E-01  | 9.3240E-01  | 8.8471E-01 | 2.3569E+00 | 2.3951E-01 | 1.2762E+00  | 8.5332E-01 | 7.5113E-01 | 1.1535E+00 | 0.234609845  |
| F6      |                     |            |             |             |            |            |            |             |            |            |            |              |
| Worst   | 1.0058E+01          | 9.7766E+00 | 1.1442E+01  | 1.1279E+01  | 1.0841E+01 | 1.2191E+01 | 1.2052E+01 | 1.4029E+01  | 6.2782E+00 | 1.1812E+01 | 1.1329E+01 | 5.044147869  |
| Average | 8.3144E+00          | 8.4847E+00 | 1.0754E+01  | 9.9834E+00  | 9.6346E+00 | 1.1480E+01 | 1.1649E+01 | 1.2335E+01  | 5.4861E+00 | 1.1146E+01 | 9.6370E+00 | 4.43199477   |
| Best    | 4.6493E+00          | 7.6595E+00 | 9.8895E+00  | 8.8972E+00  | 8.5186E+00 | 1.0921E+01 | 1.1464E+01 | 1.1209E+01  | 4.5119E+00 | 9.8660E+00 | 8.2812E+00 | 3.547038584  |
| STD     | 2.1161E+00          | 8.7632E-01 | 6.6035E-01  | 9.3240E-01  | 8.8471E-01 | 4.7370E-01 | 2.3951E-01 | 1.1276E+01  | 8.5332E-01 | 7.5113E-01 | 1.1535E+00 | 0.666906413  |
| F7      |                     |            |             |             |            |            |            |             |            |            |            |              |
| Worst   | 3.8973E+02          | 7.6818E+02 | 5.4218E+02  | 4.1544E+02  | 1.2605E+03 | 1.3979E+03 | 6.5949E+02 | 1.4602E+02  | 5.6388E+02 | 1.0631E+03 | 1.1302E+03 | 556.5354916  |
| Average | 2.7780E+02          | 5.0079E+02 | 2.0373E+02  | 2.0108E+02  | 9.4774E+02 | 6.5560E+02 | 3.5348E+02 | 4.7289E+01  | 4.6133E+02 | 8.5032E+02 | 8.0560E+02 | 228.1812071  |
| Best    | 2.0976E+02          | 2.4958E+02 | -2.2288E+02 | -3.4109E+00 | 4.9273E+02 | 1.8713E+02 | 1.2363E+02 | -8.8834E+01 | 2.8857E+02 | 4.7767E+02 | 4.6215E+02 | -95.13810593 |
| STD     | 7.0498E+01          | 2.1911E+02 | 2.8572E+02  | 1.7996E+02  | 3.0667E+02 | 4.4719E+02 | 2.2858E+02 | 9.7761E+01  | 1.1757E+02 | 2.2416E+02 | 2.5333E+02 | 283.8794351  |
| F8      |                     |            |             |             |            |            |            |             |            |            |            |              |
| Worst   | 6.0065E+00          | 6.1986E+00 | 5.6001E+00  | 5.6265E+00  | 6.4732E+00 | 6.1027E+00 | 6.8118E+00 | 4.8994E+00  | 6.7080E+00 | 6.6863E+00 | 6.6408E+00 | 5.531143673  |
| Average | 5.0660E+00          | 5.5874E+00 | 3.9066E+00  | 4.9495E+00  | 5.9517E+00 | 5.7015E+00 | 5.4830E+00 | 4.0886E+00  | 5.4825E+00 | 5.9026E+00 | 6.1017E+00 | 5.312594537  |
| Best    | 3.9924E+00          | 5.1592E+00 | 2.4154E+00  | 4.3550E+00  | 5.2004E+00 | 5.1209E+00 | 2.8996E+00 | 2.5565E+00  | 4.8619E+00 | 5.3787E+00 | 5.6658E+00 | 5.133001884  |
| STD     | 7.8631E-01          | 4.3007E-01 | 1.1569E+00  | 6.1698E-01  | 4.9292E-01 | 3.9215E-01 | 1.6897E+00 | 9.1352E-01  | 7.1055E-01 | 5.7395E-01 | 4.2379E-01 | 0.171064613  |
| F9      |                     |            |             |             |            |            |            |             |            |            |            |              |
| Worst   | 2.4328E+00          | 2.9754E+00 | 2.4823E+00  | 2.4437E+00  | 1.9550E+02 | 2.8278E+00 | 7.1355E+00 | 2.4978E+00  | 2.9267E+00 | 4.5935E+02 | 6.4013E+00 | 2.566742354  |
| Average | 2.3908E+00          | 2.6643E+00 | 2.4025E+00  | 2.4115E+00  | 5.6366E+01 | 2.6040E+00 | 4.9324E+00 | 2.4163E+00  | 2.7329E+00 | 2.0256E+02 | 5.3971E+00 | 2.496126373  |
| Best    | 2.3533E+00          | 2.5188E+00 | 2.3641E+00  | 2.3873E+00  | 2.7440E+00 | 2.4148E+00 | 3.2719E+00 | 2.3484E+00  | 2.3814E+00 | 4.5225E+01 | 3.9548E+00 | 2.455247496  |
| STD     | 3.1720E-02          | 1.8276E-01 | 4.8202E-02  | 3.3764E-02  | 8.0061E+01 | 1.7406E-01 | 1.5294E+00 | 5.9561E-02  | 2.1946E-01 | 1.5775E+02 | 9.3385E-01 | 0.042546944  |
| F10     |                     |            |             |             |            |            |            |             |            |            |            |              |
| Worst   | 2.0279E+01          | 2.0001E+01 | 2.0475E+01  | 2.0671E+01  | 2.0639E+01 | 2.0088E+01 | 2.0603E+01 | 2.1035E+01  | 2.0003E+01 | 2.0552E+01 | 2.0459E+01 | 20.27673685  |
| Average | 1.6292E+01          | 2.0000E+01 | 2.0410E+01  | 2.0422E+01  | 2.0436E+01 | 2.0017E+01 | 2.0546E+01 | 2.1007E+01  | 2.0000E+01 | 2.0478E+01 | 2.0299E+01 | 20.09974459  |
| Best    | 7.6041E-01          | 2.0000E+01 | 2.0323E+01  | 2.0122E+01  | 2.0288E+01 | 1.9999E+01 | 2.0482E+01 | 2.1000E+01  | 1.9998E+01 | 2.0417E+01 | 2.0208E+01 | 20.01121164  |
| STD     | 8.6827E+00          | 3.7182E-04 | 5.6102E-02  | 2.0165E-01  | 1.3960E-01 | 3.9305E-02 | 4.5221E-02 | 3.5626E-02  | 1.8765E-03 | 5.8884E-02 | 1.0182E-01 | 0.103332342  |
| (W L T) | (5 5 0)             | (0 10 0)   | (1 8 1)     | (0 9 1)     | (0 10 0)   | (0 9 1)    | (0 10 0)   | (3 6 1)     | (0 10 0)   | (0 10 0)   | (0 10 0)   | (1 9 0)      |
| Mean    | 2.7000E+00          | 6.4000E+00 | 4.6000E+00  | 6.0000E+00  | 9.8000E+00 | 6.6000E+00 | 8.2000E+00 | 4.1000E+00  | 5.6000E+00 | 1.0100E+01 | 8.7000E+00 | 4.8000E+00   |
| Ranking | 1                   | 7          | 3           | 6           | 11         | 8          | 9          | 2           | 5          | 12         | 10         | 4            |

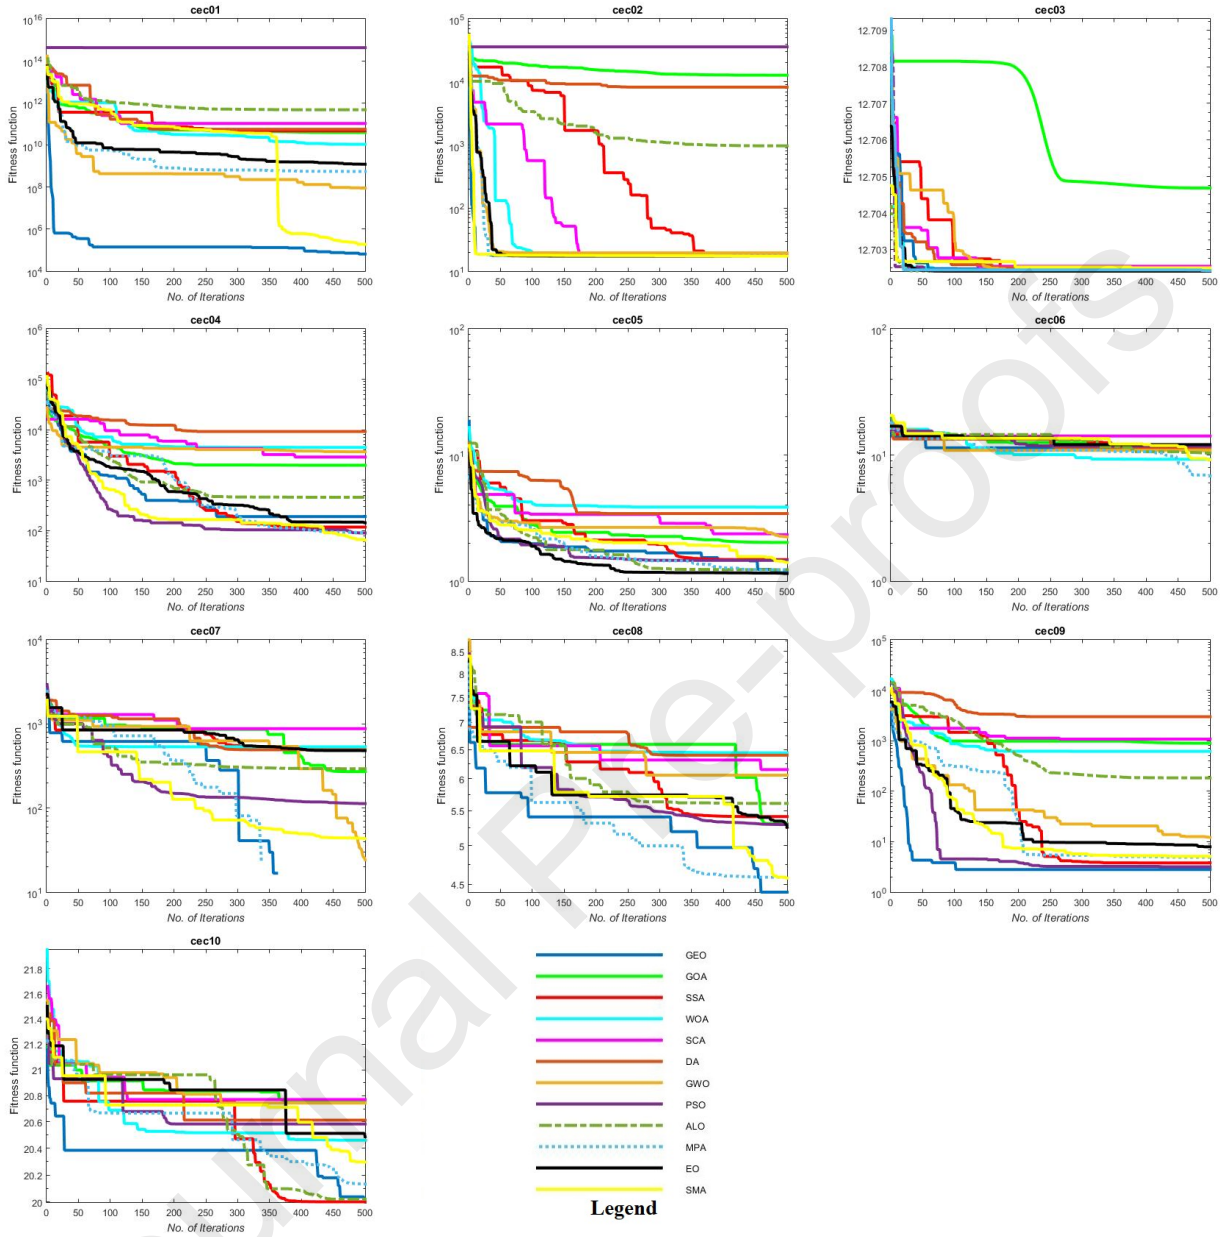

Figure 11: Convergence behavior of the comparative algorithms on CEC2019 test functions.

#### 4.4. Real-world applications

In this section, the proposed algorithm is evaluated in solving seven constrained real engineering problems, namely tension/compression spring design problem, pressure vessel design problem, welded beam design problem, 3-bar truss design problem, speed reducer problem, cantilever beam design problem, and multiple disc clutch brake problem. These problems contain several inequality constraints. The death penalty function is used in which the algorithm obtains significant values if it violates any of the constraints.

The parameter settings are set as the previous experiments.

#### 4.4.1. Tension/compression spring design problem

The goal of this problem is to minimize the weight of the tension/compression spring by selecting the best values of the following parameters wire diameter ( $d$ ), the number of active coils ( $N$ ), and mean coil diameter ( $D$ ). Figure 12 shows the problem style and the mathematical form is given in Equation (18).

The proposed AO is compared with the following optimization algorithms, GSA [26], OBSCA [63], CPSO [64], CC [65], RO [66], HS [67], CSCA [68], GA [69], WOA [21], MVO [10], PSO [64], ES [70]. The results are listed in Table 17 and showed that the AO obtained the best results than all other algorithms. Furthermore, Figure 13 illustrates the curves of the objective values, the trajectory of 1st solution, and the convergence of the AO during solving the problem.

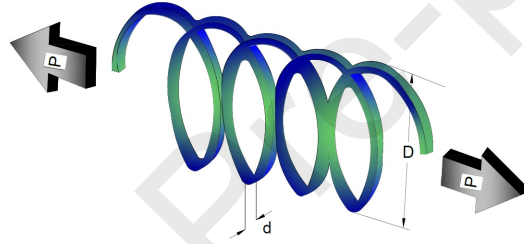

Figure 12: Tension/compression spring design problem.

$$\text{Consider } \vec{x} = [x_1 \ x_2 \ x_3] = [d \ D \ N],$$

$$\text{Minimize } f(\vec{x}) = (x_3 + 2)x_2x_1^2,$$

$$\text{Subject to } g_1(\vec{x}) = 1 - \frac{x_2^3x_3}{71785x_1^4} \leq 0,$$

$$g_2(\vec{x}) = \frac{4x_2^2 - x_1x_2}{12566(x_2x_1^3 - x_1^4)} + \frac{1}{5108x_1^2} \leq 0,$$

$$g_3(\vec{x}) = 1 - \frac{140.45x_1}{x_2^2x_3} \leq 0, \tag{18}$$

$$g_4(\vec{x}) = \frac{x_1 + x_2}{1.5} - 1 \leq 0,$$

$$\text{Variables range } 0.05 \leq x_1 \leq 2$$

$$0.25 \leq x_2 \leq 1.30$$

$$2.00 \leq x_3 \leq 15$$

Table 17: Results of the comparative algorithms for solving the tension/compression spring design problem.

| Algorithm  | Optimal values for variables |          |           | Optimal weight  | Ranking |
|------------|------------------------------|----------|-----------|-----------------|---------|
|            | $d$                          | $D$      | $N$       |                 |         |
| GSA [26]   | 0.050276                     | 0.323680 | 13.525410 | 0.0127022       | 10      |
| OBSCA [63] | 0.05230                      | 0.31728  | 12.54854  | 0.012625        | 2       |
| CPSO [64]  | 0.051728                     | 0.357644 | 11.244543 | 0.0126747       | 5       |
| CC [65]    | 70.050000                    | 0.315900 | 14.250000 | 0.0128334       | 13      |
| RO [66]    | 0.051370                     | 0.349096 | 11.76279  | 0.0126788       | 8       |
| HS [67]    | 0.051154                     | 0.349871 | 12.076432 | 0.0126706       | 4       |
| CSCA [68]  | 0.051609                     | 0.354714 | 11.410831 | 0.0126702       | 3       |
| GA [69]    | 0.051480                     | 0.351661 | 11.632201 | 0.01270478      | 11      |
| WOA [21]   | 0.051207                     | 0.345215 | 12.004032 | 0.0126763       | 7       |
| MVO [10]   | 0.05251                      | 0.37602  | 10.33513  | 0.012790        | 12      |
| PSO [64]   | 0.051728                     | 0.357644 | 11.244543 | 0.0126747       | 5       |
| ES [70]    | 0.051643                     | 0.355360 | 11.397926 | 0.012698        | 9       |
| AO         | 0.0502439                    | 0.35262  | 10.5425   | <b>0.011165</b> | 1       |

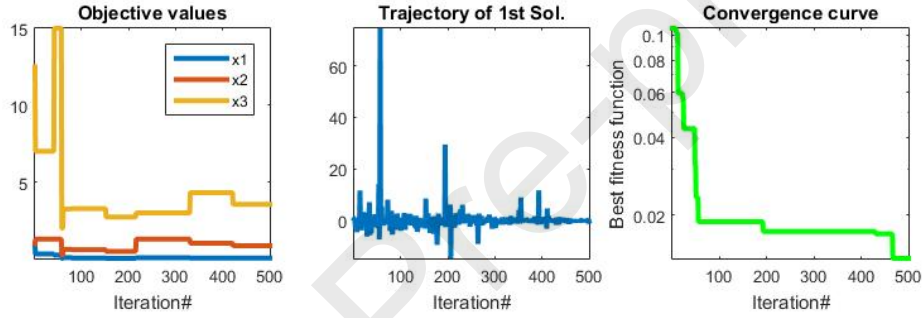

Figure 13: Qualitative results for the tension/compression spring design problem.

#### 4.4.2. Pressure vessel design problem

This problem tries to minimize the total cost of the cylindrical pressure vessel to match the pressure requirements. 14 exhibits the style of this problem. Four variables in this problem need to be minimized (i.e., the thickness of the shell ( $T_s$ ), the inner radius ( $R$ ), the thickness of the head ( $T_h$ ), and the length of the cylindrical section( $L$ )). There are also four constraints, as follows:

$$\text{Consider } \vec{x} = [x_1 \ x_2 \ x_3 \ x_4] = [T_s \ T_h \ R \ L],$$

$$\text{Minimize } 0.6224x_1x_3x_4 + 1.7781x_2x_3^2 + 3.1661x_1^2x_4 + 19.84x_1^2x_3,$$

$$\text{Subject to } g_1(\vec{x}) = -x_1 + 0.0193x_3 \leq 0,$$

$$g_2(\vec{x}) = -x_2 + 0.00954x_3 \leq 0,$$

$$g_3(\vec{x}) = -\pi x_3^2x_4 - \frac{4}{3}\pi x_3^3 + 1296000 \leq 0,$$

$$g_4(\vec{x}) = x_4 - 240 \leq 0,$$

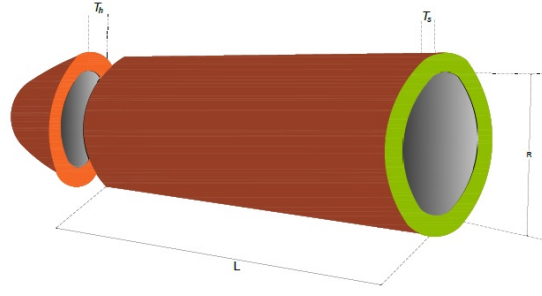

Figure 14: Pressure vessel design problem

Table 18: Results of the comparative algorithms for solving the pressure vessel design problem.

| Algorithm         | Optimal values for variables |          |            |            | Optimal cost     | Ranking |
|-------------------|------------------------------|----------|------------|------------|------------------|---------|
|                   | $T_s$                        | $T_h$    | $R$        | $L$        |                  |         |
| Branch-bound [71] | 1.125                        | 0.625    | 48.97      | 106.72     | 7982.5           | 15      |
| HS [67]           | 1.125000                     | 0.625000 | 58.29015   | 43.69268   | 7197.730         | 14      |
| MVO [10]          | 0.8125                       | 0.4375   | 42.090738  | 176.73869  | 6060.8066        | 12      |
| WOA [21]          | 0.812500                     | 0.437500 | 42.0982699 | 176.638998 | 6059.7410        | 9       |
| ACO [72]          | 0.812500                     | 0.437500 | 42.098353  | 176.637751 | 6059.7258        | 7       |
| ES [70]           | 0.8125                       | 0.4375   | 42.098087  | 176.640518 | 6059.74560       | 10      |
| HPSO [73]         | 0.8125                       | 0.4375   | 42.0984    | 176.6366   | 6059.7143        | 5       |
| CSS [74]          | 0.8125                       | 0.4375   | 42.1036    | 176.5727   | 6059.0888        | 4       |
| CSCA [68]         | 0.8125                       | 0.4375   | 42.098411  | 176.63769  | 6059.7340        | 8       |
| PSO-SCA [75]      | 0.8125                       | 0.4375   | 42.098446  | 176.6366   | 6059.71433       | 6       |
| GWO [76]          | 0.8125                       | 0.4345   | 42.0892    | 176.7587   | 6051.5639        | 3       |
| GA [69]           | 0.81250                      | 0.43750  | 42.097398  | 176.65405  | 6059.94634       | 11      |
| CPSO [64]         | 0.8125                       | 0.4375   | 42.091266  | 176.7465   | 6061.0777        | 13      |
| GSA [9]           | 1.125                        | 0.625    | 55.9886598 | 84.4542025 | 8538.8359        | 6       |
| SMA [62]          | 0.7931                       | 0.3932   | 40.6711    | 196.2178   | 5994.1857        | 2       |
| AO                | 1.0540                       | 0.182806 | 59.6219    | 38.8050    | <b>5949.2258</b> | 1       |

$$\text{Variables range } 0 \leq x_1 \leq 99,$$

$$0 \leq x_2 \leq 99,$$

$$10 \leq x_3 \leq 200,$$

$$10 \leq x_4 \leq 200$$

(19)

The AO is compared with branch-bound [71], HS [67], MVO [10], WOA [21], ACO [72], ES [70], HPSO [73], CSS [74], CSCA [68], PSO-SCA [75], GWO [76], GA [69], CPSO [64], GSA [9], SMA [62]. From the results in Table 18 we can see that, the AO was ranked first and reached the minimum total cost in solving pressure vessel design problem. In addition, Figure 15 shows the curves of the objective values, the trajectory of 1st solution, and the convergence of the AO during solving the problem.



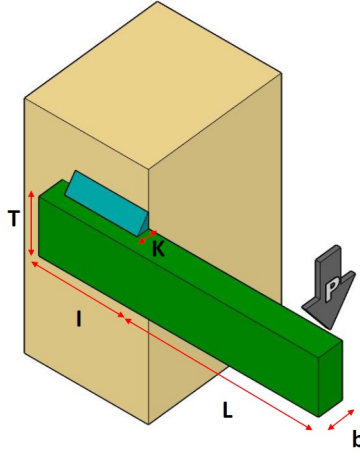

Figure 16: Welded beam design problem.

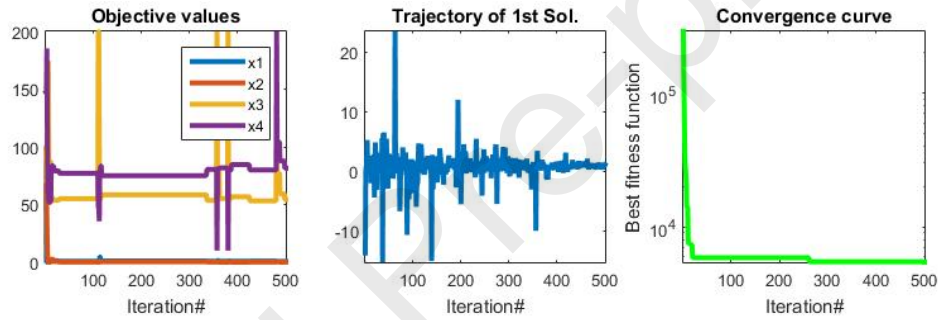

Figure 15: Qualitative results for the pressure vessel design problem

#### 4.4.3. Welded beam design problem

This problem aims to minimize the economic cost of the welded beam design. The design of this problem is shown in Figure 16. Four variables and seven constraints need to be optimized. These variables are the thickness of the weld ( $h$ ), the thickness of the bar ( $bb$ ), length of the attached part of the bar ( $l$ ), and the height of the bar ( $tt$ ). The mathematical form is listed in Equation (20).

Table 19 listed the results of the AO and the compared algorithms namely OBSCA [63], GSA [26], RO [66], CSCA [68], GA [77], DAVID [78], SIMPLEX [78], APPROX [78], HS [79], SSA [22], CPSO [64], WOA [21], MVO [10], MPA [24], SMA [62]. From this table we can noticed that, the AO outperformed all other algorithms and obtained the minimum value of the total cost. Figure 17 shows the curves of the AO during solving the problem.



$$\text{Consider } \vec{x} = [x_1 \ x_2 \ x_3 \ x_4] = [h \ l \ tt \ bb],$$

$$\text{Minimize } f(\vec{x}) = 1.10471x_1^2x_2 + 0.04811x_3x_4(14.0 + x_2),$$

$$\text{Subject to } g_1(\vec{x}) = \tau(\vec{x}) - \tau_{max} \leq 0,$$

$$g_2(\vec{x}) = \sigma(\vec{x}) - \sigma_{max} \leq 0,$$

$$g_3(\vec{x}) = \delta(\vec{x}) - \delta_{max} \leq 0,$$

$$g_4(\vec{x}) = x_1 - x_4 \leq 0,$$

$$g_5(\vec{x}) = P - P_c(\vec{x}) \leq 0,$$

$$g_6(\vec{x}) = 0.125 - x_1 \leq 0,$$

$$g_7(\vec{x}) = 1.10471x_1^2 + 0.04811x_3x_4(14.0 + x_2) - 5.0 \leq 0$$

$$\text{Variables range } 0.1 \leq x_1 \leq 2,$$

$$0.1 \leq x_2 \leq 10,$$

$$0.1 \leq x_3 \leq 10,$$

$$0.1 \leq x_4 \leq 2$$

(20)

$$\text{where } \tau(\vec{x}) = \sqrt{(\tau')^2 + 2\tau'\tau''\frac{x_2}{2R} + (\tau'')^2},$$

$$\tau' = \frac{p}{\sqrt{2x_1x_2}}, \quad \tau'' = \frac{MR}{J},$$

$$M = P(L + \frac{x_2}{2}),$$

$$R = \sqrt{\frac{x_2^2}{4} + (\frac{x_1 + x_3}{2})^2},$$

$$J = 2 \left\{ \sqrt{2x_1x_2} \left[ \frac{x_2^2}{4} + (\frac{x_1 + x_3}{2})^2 \right] \right\},$$

$$\sigma(\vec{x}) = \frac{6PL}{x_4x_3^2}, \quad \delta(\vec{x}) = \frac{6PL^3}{Ex_3^2x_4}$$

$$P_c(\vec{x}) = \frac{4.013E\sqrt{\frac{x_2^2x_4^6}{36}}}{L^2} \left(1 - \frac{x_3}{2L}\sqrt{\frac{E}{4G}}\right),$$

$$P = 6000 \text{ lb}, L = 14 \text{ in.}, \quad \delta_{max} = 0.25 \text{ in.},$$

$$E = 30 \times 10^6 \text{ psi}, \quad G = 12 \times 10^6 \text{ psi},$$

$$\tau_{max} = 13600 \text{ psi}, \quad \sigma_{max} = 30000 \text{ psi}$$

Table 19: Results of the comparative algorithms for solving the welded beam design problem.

| Algorithm    | Optimal values for variables |          |          |          | Optimal cost  | Raanking |
|--------------|------------------------------|----------|----------|----------|---------------|----------|
|              | h                            | l        | t        | b        |               |          |
| OBSCA [63]   | 0.230824                     | 3.069152 | 8.988479 | 0.208795 | 1.722315      | 3        |
| GSA [26]     | 0.182129                     | 3.856979 | 10.000   | 0.202376 | 1.87995       | 11       |
| RO [66]      | 0.203687                     | 3.528467 | 9.004233 | 0.207241 | 1.735344      | 10       |
| CSCA [68]    | 0.203137                     | 3.542998 | 9.033498 | 0.206179 | 1.733461      | 9        |
| GA [77]      | 0.2489                       | 6.1730   | 8.1789   | 0.2533   | 2.4300        | 15       |
| DAVID [78]   | 0.2434                       | 6.2552   | 8.2915   | 0.2444   | 2.3841        | 14       |
| SIMPLEX [78] | 0.2792                       | 5.6256   | 7.7512   | 0.2796   | 2.5307        | 16       |
| APPROX [78]  | 0.2444                       | 6.2189   | 8.2915   | 0.2444   | 2.3815        | 13       |
| HS [79]      | 0.2442                       | 6.2231   | 8.2915   | 0.2400   | 2.3807        | 12       |
| SSA [22]     | 0.2057                       | 3.4714   | 9.0366   | 0.2057   | 1.72491       | 5        |
| CPSO [64]    | 0.202369                     | 3.544214 | 9.04821  | 0.205723 | 1.72802       | 7        |
| WOA [21]     | 0.205396                     | 3.484293 | 9.037426 | 0.206276 | 1.730499      | 8        |
| MVO [10]     | 0.205463                     | 3.473193 | 9.044502 | 0.205695 | 1.72645       | 6        |
| MPA [24]     | 0.205728                     | 3.470509 | 9.036624 | 0.205730 | 1.724853      | 4        |
| SMA [62]     | 0.2054                       | 3.2589   | 9.0384   | 0.2058   | 1.69604       | 2        |
| AO           | 0.1631                       | 3.3652   | 9.0202   | 0.2067   | <b>1.6566</b> | 1        |

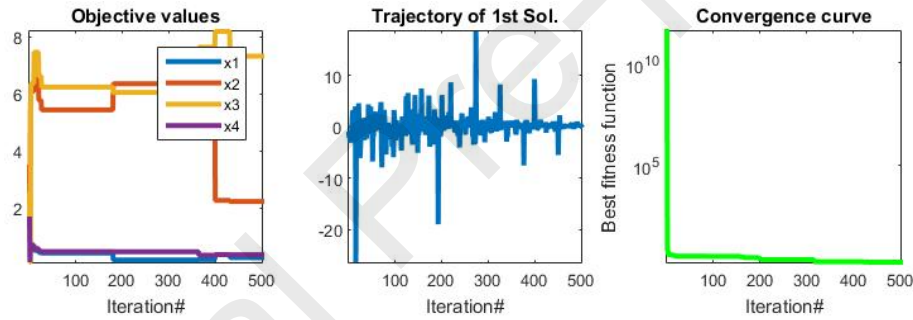

Figure 17: Qualitative results for the welded beam design problem.

#### 4.4.4. 3-bar truss design problem

The 3-bar truss design is a problem in the field of civil engineering. It tries to manipulate two parameters in order to achieve the minimum weight in designing a truss. Figure 18 shows the design of this problem and its mathematical form is given in Equation (21).

The AO is compared with Ray and Sain [80], AAA [81], SSA [22], MBA [82], DEDS [83], GOA [26], PSO-DE [75], CS [20]. The comparison results are listed in Table 20 and showed the superiority of the AO in solving this problem. Figure 19 shows the curves of the AO during solving the problem.

Table 20: Results of the comparative algorithms for solving the 3-bar truss design problem.

| Algorithm         | Optimal values for variables |               | Optimal      | Ranking |
|-------------------|------------------------------|---------------|--------------|---------|
|                   | $x_1$                        | $x_2$         | weight       |         |
| Ray and Sain [80] | 0.795                        | 0.395         | 264.3        | 9       |
| AAA [81]          | 0.7887354                    | 0.408078      | 263.895880   | 6       |
| SSA [22]          | 0.78866541                   | 0.408275784   | 263.89584    | 2       |
| MBA [82]          | 0.7885650                    | 0.4085597     | 263.89585    | 5       |
| DEDS [83]         | 0.78867513                   | 0.40824828    | 263.89584    | 2       |
| GOA [26]          | 0.78889755557                | 0.40761957011 | 263.89588149 | 7       |
| PSO-DE [75]       | 0.7886751                    | 0.4082482     | 263.89584    | 2       |
| CS [20]           | 0.78867                      | 0.40902       | 263.9716     | 8       |
| AO                | 0.7926                       | 0.3966        | 263.8684     | 1       |

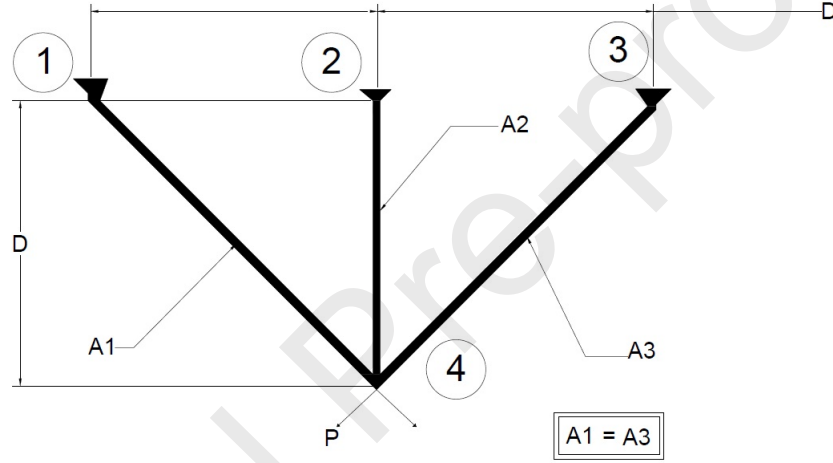

Figure 18: 3-bar truss design problem.

Consider  $\vec{x} = [x_1 \ x_2] = [A_1 \ A_2]$ ,

Minimize  $f(\vec{x}) = (2\sqrt{2x_1} + x_2) * l$ ,

Subject to  $g_1(\vec{x}) = \frac{\sqrt{2x_1} + x_2}{\sqrt{2x_1^2 + 2x_1x_2}} P - \sigma \leq 0$ ,

$g_2(\vec{x}) = \frac{x_2}{\sqrt{2x_1^2 + 2x_1x_2}} P - \sigma \leq 0$ , (21)

$g_3(\vec{x}) = \frac{1}{\sqrt{2x_2} + x_1} P - \sigma \leq 0$ ,

Variables range  $0 \leq x_1, x_2 \leq 1$ ,

where  $l = 100 \text{ cm}$ ,  $P = 2 \text{ KN/cm}^2$ ,  $\sigma = 2 \text{ KN/cm}^2$

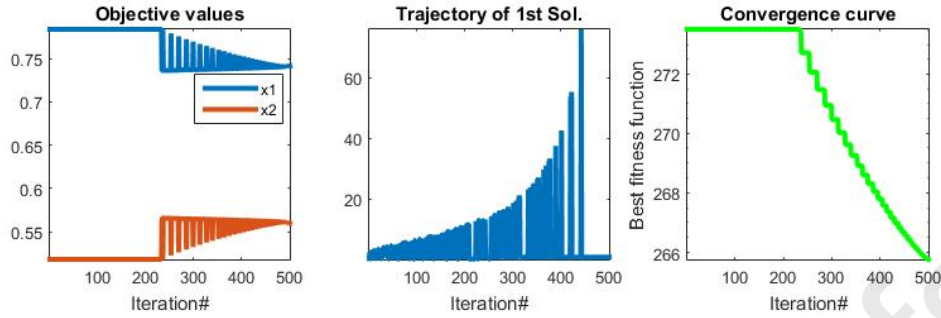

Figure 19: Qualitative results for the 3-bar truss design problem.

#### 4.4.5. Speed reducer problem

This problem tries to minimize the speed reducer's total weights by optimizing seven variables regarding the limitations of the gear teeth' curvature stress, transverse deflections of the shafts, and stresses in the shafts, and surface stress. Figure 20 shows the design of this problem, and its mathematical form is given in Equation (22).

The AO is compared with GA [84], SES [85], PSO [86], GSA [9], hHHO-SCA [87], MDA [88], SCA [38], HS [89], FA [90], and SBSM [91]. The results of the AO and the compared methods are listed in Table 21. From this table, the AO is ranked first and outperformed all methods in solving this problem whereas, the SBSM is ranked second followed by FA, MDA, and SES, respectively. Figure 21 shows the curves of the AO during solving the problem.

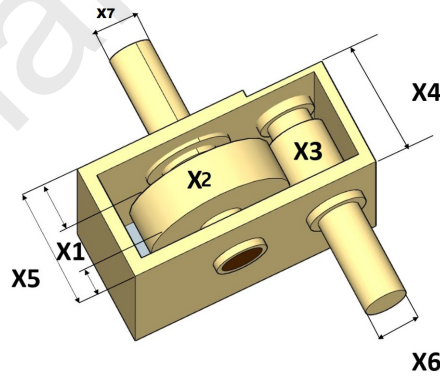

Figure 20: Speed reducer problem.

Table 21: Results of the comparative algorithms for solving the speed reducer design problem.

| Algorithm     | Optimal values for variables |          |         |          |          |          |          | Optimal weight | Ranking |
|---------------|------------------------------|----------|---------|----------|----------|----------|----------|----------------|---------|
|               | $x_1$                        | $x_2$    | $x_3$   | $x_4$    | $x_5$    | $x_6$    | $x_7$    |                |         |
| GA [84]       | 3.510253                     | 0.7      | 17      | 8.35     | 7.8      | 3.362201 | 5.287723 | 3067.561       | 10      |
| SES [85]      | 3.506163                     | 0.700831 | 17      | 7.460181 | 7.962143 | 3.362900 | 5.308949 | 3025.005127    | 5       |
| PSO [86]      | 3.5001                       | 0.7000   | 17.0002 | 7.5177   | 7.7832   | 3.3508   | 5.2867   | 3145.922       | 11      |
| GSA [9]       | 3.600000                     | 0.7      | 17      | 8.3      | 7.8      | 3.369658 | 5.289224 | 3051.120       | 9       |
| hHHO-SCA [87] | 3.506119                     | 0.7      | 17      | 7.3      | 7.99141  | 3.452569 | 5.286749 | 3029.873076    | 7       |
| MDA [88]      | 3.5                          | 0.7      | 17      | 7.3      | 7.670396 | 3.542421 | 5.245814 | 3019.583365    | 4       |
| SCA [38]      | 3.508755                     | 0.7      | 17      | 7.3      | 7.8      | 3.461020 | 5.289213 | 3030.563       | 8       |
| HS [89]       | 3.520124                     | 0.7      | 17      | 8.37     | 7.8      | 3.366970 | 5.288719 | 3029.002       | 6       |
| FA [90]       | 3.507495                     | 0.7001   | 17      | 7.719674 | 8.080854 | 3.351512 | 5.287051 | 3010.137492    | 3       |
| SBSM [91]     | 3.506122                     | 0.700006 | 17      | 7.549126 | 7.859330 | 3.365576 | 5.289773 | 3008.08        | 2       |
| AO            | 3.5021                       | 0.7000   | 17.0000 | 7.3099   | 7.7476   | 3.3641   | 5.2994   | 3007.7328      | 1       |

Minimize  $f(\vec{x}) = 0.7854x_1x_2^2(3.3333x_3^2 + 14.9334x_3 - 43.0934) - 1.508x_1(x_6^2 + x_7^2) + 7.4777(x_6^3 + x_7^3)$

subject to

$$\begin{aligned}
s.t. g_1(\vec{x}) &= \frac{27}{x_1x_2^2x_3} - 1 \leq 0 \\
g_2(\vec{x}) &= \frac{397.5}{x_1x_2^2x_3^2} - 1 \leq 0 \\
g_3(\vec{x}) &= \frac{1.93x_4^3}{x_2x_3x_6^4} - 1 \leq 0 \\
g_4(\vec{x}) &= \frac{1.93x_5^3}{x_2x_3x_7^4} - 1 \leq 0 \\
g_5(\vec{x}) &= \frac{\sqrt{(\frac{745x_4}{x_2x_3})^2 + 16.9 \times 10^6}}{110.0x_6^3} - 1 \leq 0 \\
g_6(\vec{x}) &= \frac{\sqrt{(\frac{745x_4}{x_2x_3})^2 + 157.5 \times 10^6}}{85.0x_6^3} - 1 \leq 0 \\
g_7(\vec{x}) &= \frac{x_2x_3}{40} - 1 \leq 0 \\
g_8(\vec{x}) &= \frac{5x_2}{x_1} - 1 \leq 0 \\
g_9(\vec{x}) &= \frac{x_1}{12x_2} - 1 \leq 0 \\
g_{10}(\vec{x}) &= \frac{1.5x_6 + 1.9}{x_4} - 1 \leq 0 \\
g_{11}(\vec{x}) &= \frac{1.1x_7 + 1.9}{x_5} - 1 \leq 0
\end{aligned}$$

where

$$2.6 \leq x_1 \leq 3.6, 0.7 \leq x_2 \leq 0.8, 17 \leq x_3 \leq 28, 7.3 \leq x_4 \leq 8.3, 7.8 \leq x_5 \leq 8.3, 2.9 \leq x_6 \leq 3.9, 5.0 \leq x_7 \leq 5.5 \quad (22)$$

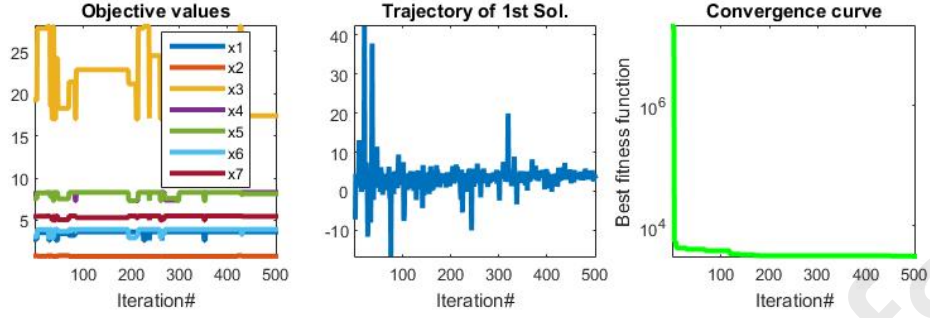

Figure 21: Qualitative results for the speed reducer design problem.

#### 4.4.6. Cantilever beam design problem

This problem is a type of concrete engineering problems. It works to minimize the total weight of a cantilever beam by optimizing the hollow square cross-section parameters. Figure 22 shows the design of this problem and its mathematical form is given in Equation (23).

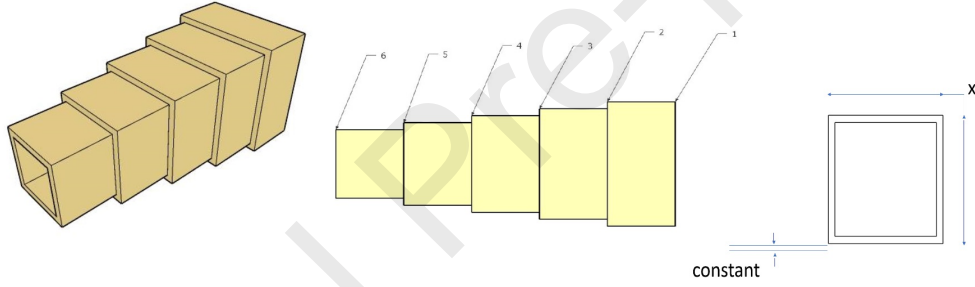

Figure 22: Cantilever beam design problem.

Consider  $x = [x_1 \ x_2 \ x_3 \ x_4 \ x_5]$

Minimise  $f(\vec{x}) = 0.6224(x_1 + x_2 + x_3 + x_4 + x_5)$ ,

subject to

$$g(\vec{x}) = \frac{60}{x_1^3} + \frac{27}{x_2^3} + \frac{19}{x_3^3} + \frac{7}{x_4^3} + \frac{1}{x_5^3} - 1 \leq 0 \quad (23)$$

Variable range

$$0.01 \leq x_1, x_2, x_3, x_4, x_5 \leq 100$$

To evaluate the performance of the proposed AO in solving this problem, it was compared with GCA-I [92], ALO [93], GCA-II [92], CS [20], MMA [92], SOS [94], SMA [62], and MFO [23]. The results of the AO and the compared methods are listed in Table 22. From this table, the AO showed a good performance

Table 22: Results of the comparative algorithms for solving the cantilever beam design problem.

| Algorithm   | Optimal values for variables |          |          |          |          | Optimal weight | Ranking |
|-------------|------------------------------|----------|----------|----------|----------|----------------|---------|
|             | $x_1$                        | $x_2$    | $x_3$    | $x_4$    | $x_5$    |                |         |
| GCA.I [92]  | 6.0100                       | 5.30400  | 4.4900   | 3.4980   | 2.1500   | 1.3400         | 7       |
| ALO [93]    | 6.01812                      | 5.31142  | 4.48836  | 3.49751  | 2.158329 | 1.33995        | 3       |
| GCA.II [92] | 6.0100                       | 5.3000   | 4.4900   | 3.4900   | 2.1500   | 1.3400         | 7       |
| CS [20]     | 6.0089                       | 5.3049   | 4.5023   | 3.5077   | 2.1504   | 1.3399         | 2       |
| MMA [92]    | 6.0100                       | 5.3000   | 4.4900   | 3.4900   | 2.1500   | 1.3400         | 7       |
| SOS [94]    | 6.01878                      | 5.30344  | 4.49587  | 3.49896  | 2.15564  | 1.33996        | 5       |
| SMA [62]    | 6.017757                     | 5.310892 | 4.493758 | 3.501106 | 2.150159 | 1.33996        | 4       |
| MFO [23]    | 5.9830                       | 5.3167   | 4.4973   | 3.5136   | 2.1616   | 1.33998        | 6       |
| AO          | 5.8881                       | 5.5451   | 4.3798   | 3.5973   | 2.1026   | 1.3390         | 1       |

in solving the cantilever beam design problem, and it came in the first rank with little difference from CS followed by ALO and SMA, respectively. Figure 21 shows the curves of the AO during solving the problem.

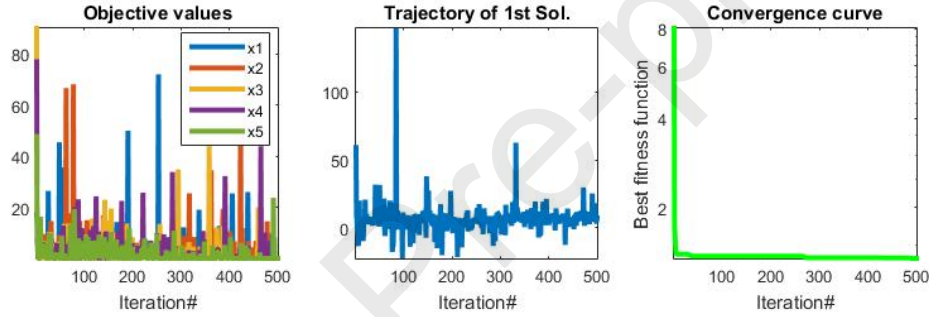

Figure 23: Qualitative results for the cantilever beam design problem.

#### 4.4.7. Multiple disc clutch brake problem

This problem works to minimize the total weight of a multiple disc clutch brake by optimizing five variables: the thickness of discs, outer radius, number of friction surfaces, inner radius, and actuating force. There are eight constraints for this problem based on the conditions of geometry and operating requirements. The feasible domain contains about 70% of the solution space. Figure 24 illustrates the design of this problem and Equation (24) represents its mathematical model.

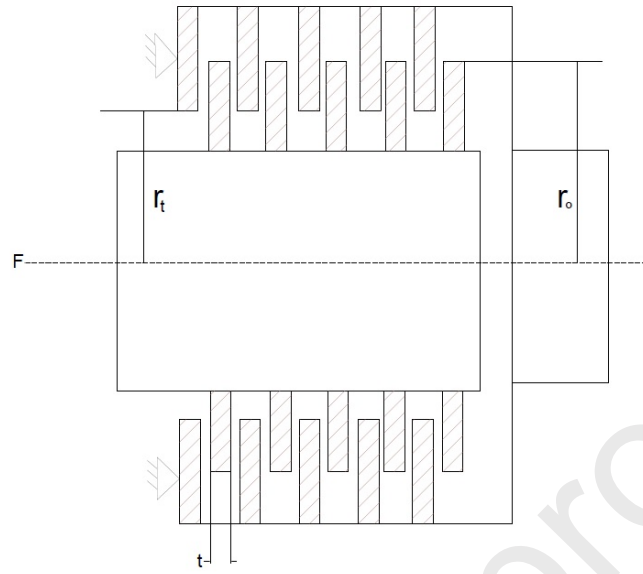

Figure 24: Multiple disc clutch brake problem.



$$\begin{aligned}
f(x) &= \Pi(r_o^2 - r_i^2)t(Z+1)\rho \\
\text{subject to } g_1(x) &= r_o - r_i - \Delta r \geq 0 \\
g_2(x) &= l_{max} - (Z+1)(t+\delta) \geq 0 \\
g_3(x) &= P_{max} - P_{rz} \geq 0 \\
g_4(x) &= P_{max} \nu_{sr \max} - P_{rz} \nu_{sr} \geq 0 \\
g_5(x) &= \nu_{sr \max} - \nu_{sr} \geq 0 \\
g_6 &= T_{max} - T \geq 0 \\
g_7(x) &= M_h - sM_s \geq 0 \\
g_8(x) &= T \geq 0 \\
\text{where } M_h &= \frac{2}{3}\mu FZ \frac{r_o^3 - r_i^2}{r_o^2 - r_i^3}, P_{rz} = \frac{F}{\Pi(r_o^2 - r_i^2)}, \\
\nu_{rz} &= \frac{2\Pi(r_o^3 - r_i^3)}{90(r_o^2 - r_i^2)}, T = \frac{I_z \Pi n}{30(M_h + M_f)} \\
\Delta r &= 20 \text{ mm}, I_z = 55 \text{ kgmm}^2, P_{max} = 1 \text{ MPa}, F_{max} = 1000 \text{ N}, \\
T_{max} &= 15 \text{ s}, \mu = 0.5, s = 1.5, M_s = 40 \text{ Nm}, \\
M_f &= 3 \text{ Nm}, n = 250 \text{ rpm}, \\
\nu_{sr \max} &= 10 \text{ m/s}, l_{max} = 30 \text{ mm}, r_{i \min} = 60, \\
r_{i \max} &= 80, r_{o \min} = 90, \\
r_{o \max} &= 110, t_{\min} = 1.5, t_{max} = 3, F_{\min} = 600, \\
F_{max} &= 1000, Z_{\min} = 2, Z_{max} = 9
\end{aligned} \tag{24}$$

The proposed AO is compared with TLBO [95], MFO [96], NSGA-II [97], MVO [98], WCA [99], and  
490 CMVO [98]. The comparison results are listed in Table 23 and showed the superiority of the AO in achieving  
the minimum total weights for this problem. Figure 25 illustrates the curves of the AO during solving the  
problem.

Table 23: Results of the comparative algorithms for solving the multiple disc clutch brake problem.

| Algorithm    | Optimal values for variables |         |       |          |        | Optimal weight | Ranking |
|--------------|------------------------------|---------|-------|----------|--------|----------------|---------|
|              | $x_1$                        | $x_2$   | $x_3$ | $x_4$    | $x_5$  |                |         |
| TLBO [95]    | 70                           | 90      | 1     | 810      | 3      | 0.313657       | 6       |
| MFO [96]     | 70                           | 90      | 1     | 910      | 3      | 0.313656       | 2       |
| NSGA-II [97] | 70                           | 90      | 1.5   | 1000     | 3      | 0.470400       | 7       |
| MVO [98]     | 70                           | 90      | 1     | 910      | 3      | 0.313656       | 2       |
| WCA [99]     | 70                           | 90      | 1     | 910      | 3      | 0.313656       | 2       |
| CMVO [98]    | 70                           | 90      | 1     | 910      | 3      | 0.313656       | 2       |
| AO           | 78.4228                      | 98.5674 | 1     | 846.8894 | 2.5294 | 0.30835        | 1       |

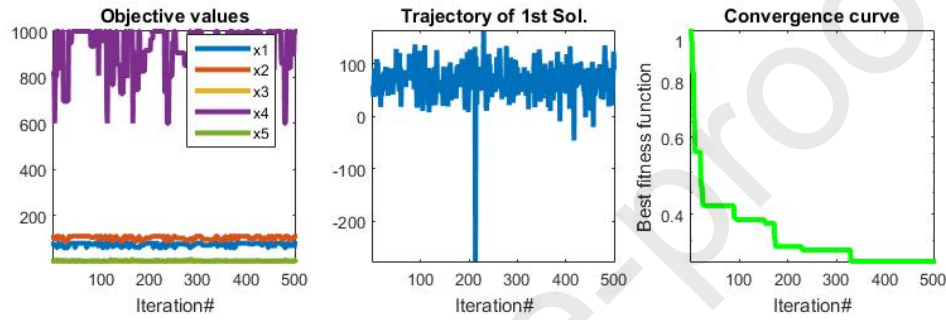

Figure 25: Qualitative results for the multiple disc clutch brake problem.

## 5. Conclusion and potential future works

In this paper, a new alternative meta-heuristic technique, named Aquila Optimizer (AO), has been developed. This algorithm simulates the behaviors of Aquila in nature. In the AO, the optimization procedures are represented in four methods; selecting the search space by high soar with the vertical stoop, exploring within a diverge search space by contour flight with short glide attack, exploiting within a converge search space by low flight with slow descent attack, and swooping by walk and grab prey.

To validate the developed AO's ability to find the optimal solution, a set of different optimization problems were used. These problems include 23 classical benchmark functions, 29 functions from the CEC2017 benchmark, ten functions from the CEC2019 benchmark, and seven engineering problems. From the statistical results of benchmarks, it has been observed that the AO provided results either better than other well-known MH techniques or, at least, nearly equivalently. Moreover, from the empirical investigation of engineering problems, it can evaluate the developed AO's applicability to tackling real-world applications.

According to the previous discussion that illustrated the developed AO's superiority, it can open a wide range of future works. This including apply AO to various applications such as PV parameter estimation, neural network, image processing applications, text and data mining applications, big data applications,

signal denoising, recourse management application, network applications, industry and engineering applications, other benchmark test functions, smart home applications, feature selection, image segmentation, task scheduling, and other. It can also be extended to real-world applications dependent on binary, discrete, and multiple objectives optimization. Moreover, AO's performance can be improved by combining it with levy flight, disruption, mutation, other stochastic components, whether the local search or global search methods and other evolutionary operators. Moreover, a discrete version of the AO can be proposed.

## References

- [1] V. Hajipour, A. Kheirkhah, M. Tavana, N. Absi, Novel pareto-based meta-heuristics for solving multi-objective multi-item capacitated lot-sizing problems, *The International Journal of Advanced Manufacturing Technology* 80 (1) (2015) 31–45.
- [2] V. Hajipour, E. Mehdizadeh, R. Tavakkoli-Moghaddam, A novel pareto-based multi-objective vibration damping optimization algorithm to solve multi-objective optimization problems, *Scientia Iranica. Transaction E, Industrial Engineering* 21 (6) (2014) 2368.
- [3] G. Wu, Across neighborhood search for numerical optimization, *Information Sciences* 329 (2016) 597–618.
- [4] F. A. Hashim, E. H. Houssein, M. S. Mabrouk, W. Al-Atabany, S. Mirjalili, Henry gas solubility optimization: A novel physics-based algorithm, *Future Generation Computer Systems* 101 (2019) 646–667.
- [5] R. Eberhart, J. Kennedy, A new optimizer using particle swarm theory, in: *MHS'95. Proceedings of the Sixth International Symposium on Micro Machine and Human Science*, Ieee, 1995, pp. 39–43.
- [6] M. Dorigo, V. Maniezzo, A. Colorni, Ant system: optimization by a colony of cooperating agents, *IEEE Transactions on Systems, Man, and Cybernetics, Part B (Cybernetics)* 26 (1) (1996) 29–41.
- [7] D. Karaboga, B. Basturk, A powerful and efficient algorithm for numerical function optimization: artificial bee colony (abc) algorithm, *Journal of global optimization* 39 (3) (2007) 459–471.
- [8] J. H. Holland, Genetic algorithms, *Scientific american* 267 (1) (1992) 66–73.
- [9] E. Rashedi, H. Nezamabadi-Pour, S. Saryazdi, Gsa: a gravitational search algorithm, *Information sciences* 179 (13) (2009) 2232–2248.
- [10] S. Mirjalili, S. M. Mirjalili, A. Hatamlou, Multi-verse optimizer: a nature-inspired algorithm for global optimization, *Neural Computing and Applications* 27 (2) (2016) 495–513.
- [11] M. Kumar, A. J. Kulkarni, S. C. Satapathy, Socio evolution & learning optimization algorithm: A socio-inspired optimization methodology, *Future Generation Computer Systems* 81 (2018) 252–272.
- [12] L. Abualigah, A. Diabat, Z. W. Geem, A comprehensive survey of the harmony search algorithm in clustering applications, *Applied Sciences* 10 (11) (2020) 3827.
- [13] S. Salcedo-Sanz, Modern meta-heuristics based on nonlinear physics processes: A review of models and design procedures, *Physics Reports* 655 (2016) 1–70.
- [14] L. Abualigah, Group search optimizer: a nature-inspired meta-heuristic optimization algorithm with its results, variants, and applications, *Neural Computing and Applications* (2020) 1–24.
- [15] L. Shang, Z. Zhou, X. Liu, Particle swarm optimization-based feature selection in sentiment classification, *Soft Computing* 20 (10) (2016) 3821–3834.

- [16] A. Elsheikh, M. Abd Elaziz, Review on applications of particle swarm optimization in solar energy systems, *International Journal of Environmental Science and Technology* 16 (2) (2019) 1159–1170.
- [17] M. Dorigo, M. Birattari, T. Stutzle, Ant colony optimization, *IEEE computational intelligence magazine* 1 (4) (2006) 28–39.
- [18] L. Abualigah, A. Diabat, Advances in sine cosine algorithm: A comprehensive survey, *Artificial Intelligence Review* 1–42.
- [19] X.-S. Yang, Firefly algorithms for multimodal optimization, in: *International symposium on stochastic algorithms*, Springer, 2009, pp. 169–178.
- [20] A. H. Gandomi, X.-S. Yang, A. H. Alavi, Cuckoo search algorithm: a metaheuristic approach to solve structural optimization problems, *Engineering with computers* 29 (1) (2013) 17–35.
- [21] S. Mirjalili, A. Lewis, The whale optimization algorithm, *Advances in engineering software* 95 (2016) 51–67.
- [22] S. Mirjalili, A. H. Gandomi, S. Z. Mirjalili, S. Saremi, H. Faris, S. M. Mirjalili, Salp swarm algorithm: A bio-inspired optimizer for engineering design problems, *Advances in Engineering Software* 114 (2017) 163–191.
- [23] S. Mirjalili, Moth-flame optimization algorithm: A novel nature-inspired heuristic paradigm, *Knowledge-based systems* 89 (2015) 228–249.
- [24] A. Faramarzi, M. Heidarinejad, S. Mirjalili, A. H. Gandomi, Marine predators algorithm: A nature-inspired metaheuristic, *Expert Systems with Applications* (2020) 113377.
- [25] M. Yazdani, F. Jolai, Lion optimization algorithm (loa): a nature-inspired metaheuristic algorithm, *Journal of computational design and engineering* 3 (1) (2016) 24–36.
- [26] S. Saremi, S. Mirjalili, A. Lewis, Grasshopper optimisation algorithm: theory and application, *Advances in Engineering Software* 105 (2017) 30–47.
- [27] G. Dhiman, V. Kumar, Emperor penguin optimizer: A bio-inspired algorithm for engineering problems, *Knowledge-Based Systems* 159 (2018) 20–50.
- [28] M. Jain, V. Singh, A. Rani, A novel nature-inspired algorithm for optimization: Squirrel search algorithm, *Swarm and evolutionary computation* 44 (2019) 148–175.
- [29] C. Bharathi, D. Rekha, V. Vijayakumar, Genetic algorithm based demand side management for smart grid, *Wireless Personal Communications* 93 (2) (2017) 481–502.
- [30] R. Storn, K. Price, Differential evolution—a simple and efficient heuristic for global optimization over continuous spaces, *Journal of global optimization* 11 (4) (1997) 341–359.
- [31] D. Simon, Biogeography-based optimization, *IEEE transactions on evolutionary computation* 12 (6) (2008) 702–713.
- [32] D. Tang, S. Dong, Y. Jiang, H. Li, Y. Huang, Itgo: Invasive tumor growth optimization algorithm, *Applied Soft Computing* 36 (2015) 670–698.
- [33] O. K. Erol, I. Eksin, A new optimization method: big bang–big crunch, *Advances in Engineering Software* 37 (2) (2006) 106–111.
- [34] R. A. Formato, Central force optimization, *Prog Electromagn Res* 77 (2007) 425–491.
- [35] R. V. Rao, V. J. Savsani, D. Vakharia, Teaching–learning-based optimization: an optimization method for continuous non-linear large scale problems, *Information sciences* 183 (1) (2012) 1–15.
- [36] R. V. Rao, V. Patel, An improved teaching-learning-based optimization algorithm for solving unconstrained optimization problems, *Scientia Iranica* 20 (3) (2013) 710–720.
- [37] N. L. Ho, T.-P. Dao, N. Le Chau, S.-C. Huang, Multi-objective optimization design of a compliant microgripper based on

hybrid teaching learning-based optimization algorithm, *Microsystem Technologies* 25 (5) (2019) 2067–2083.

[38] S. Mirjalili, Sca: a sine cosine algorithm for solving optimization problems, *Knowledge-based systems* 96 (2016) 120–133.

[39] R. Moghdani, K. Salimifard, Volleyball premier league algorithm, *Applied Soft Computing* 64 (2018) 161–185.

[40] A. Mohammadi-Balani, M. D. Nayeri, A. Azar, M. Taghizadeh-Yazdi, Golden eagle optimizer: A nature-inspired meta-heuristic algorithm, *Computers & Industrial Engineering* 152 (2021) 107050.

[41] A. Cheraghalipour, M. Hajiaghahi-Keshteli, M. M. Paydar, Tree growth algorithm (tga): A novel approach for solving optimization problems, *Engineering Applications of Artificial Intelligence* 72 (2018) 393–414.

[42] L. Abualigah, A. Diabat, S. Mirjalili, M. Abd Elaziz, A. H. Gandomi, The arithmetic optimization algorithm, *Computer methods in applied mechanics and engineering* 376 (2021) 113609.

[43] A. Kaveh, A. Dadras, A novel meta-heuristic optimization algorithm: thermal exchange optimization, *Advances in Engineering Software* 110 (2017) 69–84.

[44] H. Abedinpourshotorban, S. M. Shamsuddin, Z. Beheshti, D. N. Jawawi, Electromagnetic field optimization: A physics-inspired metaheuristic optimization algorithm, *Swarm and Evolutionary Computation* 26 (2016) 8–22.

[45] Q. Zhang, R. Wang, J. Yang, K. Ding, Y. Li, J. Hu, Collective decision optimization algorithm: A new heuristic optimization method, *Neurocomputing* 221 (2017) 123–137.

[46] L. Abualigah, Multi-verse optimizer algorithm: a comprehensive survey of its results, variants, and applications, *Neural Computing and Applications* (2020) 1–21.

[47] L. Abualigah, M. Shehab, M. Alshinwan, H. Alabool, Salp swarm algorithm: a comprehensive survey, *Neural Computing and Applications* (2019) 1–21.

[48] L. Abualigah, M. Shehab, M. Alshinwan, S. Mirjalili, M. Abd Elaziz, Ant lion optimizer: A comprehensive survey of its variants and applications, *ARCHIVES OF COMPUTATIONAL METHODS IN ENGINEERING*.

[49] M. Shehab, L. Abualigah, H. Al Hamad, H. Alabool, M. Alshinwan, A. M. Khasawneh, Moth-flame optimization algorithm: variants and applications, *Neural Computing and Applications* (2019) 1–26.

[50] K. Steenhof, M. N. Kochert, T. L. McDonald, Interactive effects of prey and weather on golden eagle reproduction, *Journal of Animal Ecology* (1997) 350–362.

[51] D. R. Hatch, Golden eagle hunting tactics, *Blue Jay* 26 (2).

[52] S. K. Carnie, Food habits of nesting golden eagles in the coast ranges of california, *The Condor* 56 (1) (1954) 3–12.

[53] R. Meinertzhagen, How do larger raptorial birds hunt their prey, *Ibis* 4 (3) (1940) 530–535.

[54] D. Dekker, Hunting behavior of golden eagles, *aquila-chrysaetos*, migrating in southwestern alberta (1985).

[55] J. Watson, *The golden eagle*, Bloomsbury Publishing, 2010.

[56] L. Abualigah, A. Diabat, A comprehensive survey of the grasshopper optimization algorithm: results, variants, and applications, *Neural Computing and Applications* (2020) 1–24.

[57] A. Faramarzi, M. Heidarinejad, B. Stephens, S. Mirjalili, Equilibrium optimizer: A novel optimization algorithm, *Knowledge-Based Systems* 191 (2020) 105190.

[58] L. M. Abualigah, A. T. Khader, E. S. Hanandeh, A new feature selection method to improve the document clustering using particle swarm optimization algorithm, *Journal of Computational Science* 25 (2018) 456–466.

[59] S. Mirjalili, Dragonfly algorithm: a new meta-heuristic optimization technique for solving single-objective, discrete, and multi-objective problems, *Neural Computing and Applications* 27 (4) (2016) 1053–1073.

[60] L. Abualigah, M. Shehab, M. Alshinwan, H. Alabool, H. Y. Abuaddous, A. M. Khasawneh, M. Al Diabat, Ts-gwo: Iot

tasks scheduling in cloud computing using grey wolf optimizer, in: *Swarm Intelligence for Cloud Computing*, Chapman and Hall/CRC, 2020, pp. 127–152.

[61] M. A. Al-Qaness, A. A. Ewees, H. Fan, L. Abualigah, M. Abd Elaziz, Marine predators algorithm for forecasting confirmed cases of covid-19 in italy, usa, iran and korea, *International Journal of Environmental Research and Public Health* 17 (10) (2020) 3520.

[62] J. Zhao, Z.-M. Gao, W. Sun, The improved slime mould algorithm with levy flight, in: *Journal of Physics: Conference Series*, Vol. 1617, IOP Publishing, 2020, p. 012033.

[63] M. A. Elaziz, D. Oliva, S. Xiong, An improved opposition-based sine cosine algorithm for global optimization, *Expert Systems with Applications* 90 (2017) 484–500.

[64] Q. He, L. Wang, An effective co-evolutionary particle swarm optimization for constrained engineering design problems, *Engineering applications of artificial intelligence* 20 (1) (2007) 89–99.

[65] J. S. Arora, *Introduction to optimum design*, Elsevier, 2004.

[66] A. Kaveh, M. Khayatazad, A new meta-heuristic method: ray optimization, *Computers & structures* 112 (2012) 283–294.

[67] M. Mahdavi, M. Fesanghary, E. Damangir, An improved harmony search algorithm for solving optimization problems, *Applied mathematics and computation* 188 (2) (2007) 1567–1579.

[68] F.-z. Huang, L. Wang, Q. He, An effective co-evolutionary differential evolution for constrained optimization, *Applied Mathematics and computation* 186 (1) (2007) 340–356.

[69] C. A. C. Coello, Use of a self-adaptive penalty approach for engineering optimization problems, *Computers in Industry* 41 (2) (2000) 113–127.

[70] E. Mezura-Montes, C. A. C. Coello, An empirical study about the usefulness of evolution strategies to solve constrained optimization problems, *International Journal of General Systems* 37 (4) (2008) 443–473.

[71] E. Sandgren, Nonlinear integer and discrete programming in mechanical design optimization, *Journal of Mechanical Design* 112 (2) (1990) 223–229.

[72] A. Kaveh, S. Talatahari, An improved ant colony optimization for constrained engineering design problems, *Engineering Computations* 27 (1) (2010) 155–182.

[73] Q. He, L. Wang, A hybrid particle swarm optimization with a feasibility-based rule for constrained optimization, *Applied mathematics and computation* 186 (2) (2007) 1407–1422.

[74] A. Kaveh, S. Talatahari, A novel heuristic optimization method: charged system search, *Acta Mechanica* 213 (3-4) (2010) 267–289.

[75] H. Liu, Z. Cai, Y. Wang, Hybridizing particle swarm optimization with differential evolution for constrained numerical and engineering optimization, *Applied Soft Computing* 10 (2) (2010) 629–640.

[76] S. Mirjalili, S. M. Mirjalili, A. Lewis, Grey wolf optimizer, *Advances in engineering software* 69 (2014) 46–61.

[77] K. Deb, Optimal design of a welded beam via genetic algorithms, *AIAA journal* 29 (11) (1991) 2013–2015.

[78] K. Ragsdell, D. Phillips, Optimal design of a class of welded structures using geometric programming.

[79] K. S. Lee, Z. W. Geem, A new meta-heuristic algorithm for continuous engineering optimization: harmony search theory and practice, *Computer methods in applied mechanics and engineering* 194 (36-38) (2005) 3902–3933.

[80] T. Ray, P. Saini, Engineering design optimization using a swarm with an intelligent information sharing among individuals, *Engineering Optimization* 33 (6) (2001) 735–748.

[81] A. E. YILDIRIM, A. KARCI, Application of three bar truss problem among engineering design optimization problems

using artificial atom algorithm, in: 2018 International Conference on Artificial Intelligence and Data Processing (IDAP), IEEE, 2018, pp. 1–5.

[82] A. Sadollah, A. Bahreininejad, H. Eskandar, M. Hamdi, Mine blast algorithm: A new population based algorithm for solving constrained engineering optimization problems, *Applied Soft Computing* 13 (5) (2013) 2592–2612.

[83] M. Zhang, W. Luo, X. Wang, Differential evolution with dynamic stochastic selection for constrained optimization, *Information Sciences* 178 (15) (2008) 3043–3074.

[84] H. SARUHAN, İ. UYGUR, Design optimization of mechanical systems using genetic algorithms, *Sakarya Üniversitesi Fen Bilimleri Enstitüsü Dergisi* 7 (2) (2003) 77–84.

[85] E. Mezura-Montes, C. C. Coello, R. Landa-Becerra, Engineering optimization using simple evolutionary algorithm, in: *Proceedings. 15th IEEE International Conference on Tools with Artificial Intelligence*, IEEE, 2003, pp. 149–156.

[86] S. Stephen, D. Christu, Dalvi, Design optimization of weight of speed reducer problem through matlab and simulation using ansys, *International Journal of Mechanical Engineering and Technology (IJMET)* 9.

[87] V. K. Kamboj, A. Nandi, A. Bhadoria, S. Sehgal, An intensify harris hawks optimizer for numerical and engineering optimization problems, *Applied Soft Computing* 89 (2020) 106018.

[88] S. Lu, H. M. Kim, A regularized inexact penalty decomposition algorithm for multidisciplinary design optimization problems with complementarity constraints, *Journal of Mechanical Design* 132 (4).

[89] Z. W. Geem, J. H. Kim, G. V. Loganathan, A new heuristic optimization algorithm: harmony search, *simulation* 76 (2) (2001) 60–68.

[90] A. Baykasoğlu, F. B. Ozsoydan, Adaptive firefly algorithm with chaos for mechanical design optimization problems, *Applied soft computing* 36 (2015) 152–164.

[91] S. Akhtar, K. Tai, T. Ray, A socio-behavioural simulation model for engineering design optimization, *Engineering Optimization* 34 (4) (2002) 341–354.

[92] H. Chickermane, H. Gea, Structural optimization using a new local approximation method, *International journal for numerical methods in engineering* 39 (5) (1996) 829–846.

[93] S. Mirjalili, The ant lion optimizer, *Advances in engineering software* 83 (2015) 80–98.

[94] M.-Y. Cheng, D. Prayogo, Symbiotic organisms search: a new metaheuristic optimization algorithm, *Computers & Structures* 139 (2014) 98–112.

[95] R. V. Rao, V. J. Savsani, D. Vakharia, Teaching–learning-based optimization: a novel method for constrained mechanical design optimization problems, *Computer-Aided Design* 43 (3) (2011) 303–315.

[96] R. Bhesdadiya, I. N. Trivedi, P. Jangir, N. Jangir, Moth-flame optimizer method for solving constrained engineering optimization problems, in: *Advances in Computer and Computational Sciences*, Springer, 2018, pp. 61–68.

[97] K. Deb, A. Srinivasan, Innovization: Discovery of innovative design principles through multiobjective evolutionary optimization, in: *Multiobjective problem solving from nature*, Springer, 2008, pp. 243–262.

[98] G. I. Sayed, A. Darwish, A. E. Hassanien, A new chaotic multi-verse optimization algorithm for solving engineering optimization problems, *Journal of Experimental & Theoretical Artificial Intelligence* 30 (2) (2018) 293–317.

[99] H. Eskandar, A. Sadollah, A. Bahreininejad, M. Hamdi, Water cycle algorithm—a novel metaheuristic optimization method for solving constrained engineering optimization problems, *Computers & Structures* 110 (2012) 151–166.
